# Supplementary material for: Diethylzinc-promoted carboxylation of aryl/alkenyl boronic acids with CO2
Source: Royal Society of Chemistry journal article supplement (doi:10.1039/d3ob01552a), 2023-01-01

## Supporting Information

# Diethylzinc-Promoted Carboxylation of Aryl/Alkenyl Boronic Acids with CO<sub>2</sub>

Tingyu Tang,<sup>a</sup> Shibiao Tang,<sup>a</sup> Bin Li,<sup>a</sup> and Baiquan Wang<sup>\*,a,b</sup>

<sup>a</sup>State Key Laboratory of Elemento-Organic Chemistry, College of Chemistry, Nankai University, Tianjin 300071, People's Republic of China

<sup>b</sup>State Key Laboratory of Organometallic Chemistry, Shanghai Institute of Organic Chemistry, Chinese Academy of Sciences, Shanghai 200032, People's Republic of China

### Contents

|                                                                                           |        |
|-------------------------------------------------------------------------------------------|--------|
| Table of Contents                                                                         | S1     |
| 1. Optimization Studies                                                                   | S2-S4  |
| 2. Mechanism Research                                                                     | S4-S6  |
| 3. References                                                                             | S6     |
| 4. Copies of <sup>1</sup> H, <sup>13</sup> C and <sup>19</sup> F NMR Spectra for Compound | S7-S86 |

## 1. Optimization Studies

General procedure: An oven-dried 50 mL schlenk tube containing a stirring bar was charged with 4-methoxyphenylboronic acid (60.8 mg, 0.4 mmol, 1.0 equiv.). The schlenk tube was evacuated and back-filled under CO<sub>2</sub> flow for three times. Then, anhydrous solvent (2.0 mL) and ZnEt<sub>2</sub> solution (2 M in toluene) was added under CO<sub>2</sub> flow, and the resulting mixture was stirred at 100 °C for 16 h. The mixture was then allowed to cool to room temperature, carefully quenched with 1 M HCl and stirred for 5 minutes. The reaction mixture was extracted five times with EtOAc and the combined organic phases were washed with brine, dried over anhydrous Na<sub>2</sub>SO<sub>4</sub> and filtered. The solvent was then removed under reduced pressure. The crude products were purified by flash chromatography (AcOH/EA/PE = 0/1/10 to 0.01/1/1).

**Table S1** Optimization of additive<sup>a</sup>

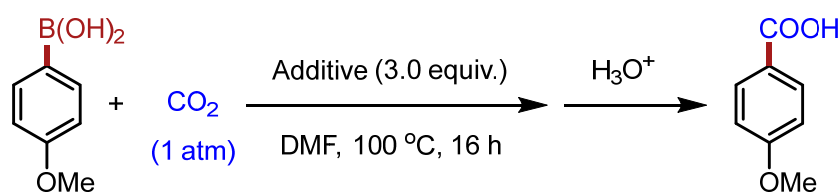

| Entry | Additive                          | Solvent    | T [°C]     | Yield [%] |
|-------|-----------------------------------|------------|------------|-----------|
| 1     | <b>ZnEt<sub>2</sub> (3.0 eq.)</b> | <b>DMF</b> | <b>100</b> | <b>94</b> |
| 2     | ZnEt <sub>2</sub> (0.0 eq.)       | DMF        | 100        | 0         |
| 3     | ZnMe <sub>2</sub> (3.0 eq.)       | DMF        | 100        | 72        |
| 4     | KHMDS                             | DMF        | 100        | 0         |
| 5     | KO <sup>t</sup> Bu                | DMF        | 100        | 0         |
| 6     | Cs <sub>2</sub> CO <sub>3</sub>   | DMF        | 100        | 0         |
| 7     | CsF                               | DMF        | 100        | 0         |

<sup>a</sup> Reaction performed on 0.40 mmol scale. Isolated yields are given.

**Table S2** Optimization of solvent <sup>a</sup>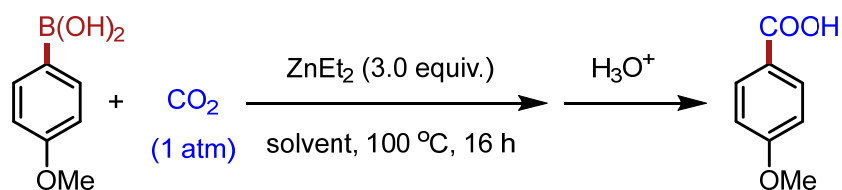

| Entry | Additive                          | Solvent     | T [°C]     | Yield [%] |
|-------|-----------------------------------|-------------|------------|-----------|
| 1     | <b>ZnEt<sub>2</sub> (3.0 eq.)</b> | <b>DMF</b>  | <b>100</b> | <b>94</b> |
| 2     | ZnEt <sub>2</sub> (3.0 eq.)       | THF         | 100        | 46        |
| 3     | ZnEt <sub>2</sub> (3.0 eq.)       | 1,4-dioxane | 100        | 66        |
| 4     | ZnEt <sub>2</sub> (3.0 eq.)       | DMA         | 100        | 77        |
| 5     | <b>ZnEt<sub>2</sub> (3.0 eq.)</b> | <b>DMSO</b> | <b>100</b> | <b>94</b> |

<sup>a</sup> Reaction performed on 0.40 mmol scale. Isolated yields are given.

**Table S3** Optimization of temperature <sup>a</sup>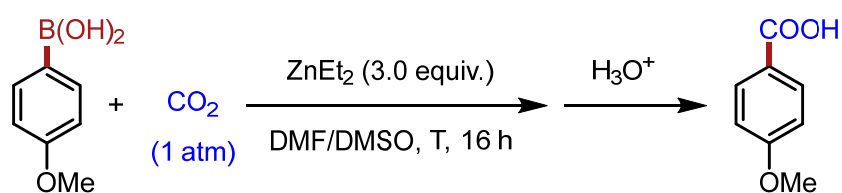

| Entry | Additive                          | Solvent     | T [°C]     | Yield [%] |
|-------|-----------------------------------|-------------|------------|-----------|
| 1     | <b>ZnEt<sub>2</sub> (3.0 eq.)</b> | <b>DMF</b>  | <b>100</b> | <b>94</b> |
| 2     | ZnEt <sub>2</sub> (3.0 eq.)       | DMF         | 70         | 84        |
| 3     | ZnEt <sub>2</sub> (3.0 eq.)       | DMF         | 50         | 60        |
| 4     | ZnEt <sub>2</sub> (3.0 eq.)       | DMF         | 25         | 16        |
| 5     | <b>ZnEt<sub>2</sub> (3.0 eq.)</b> | <b>DMSO</b> | <b>100</b> | <b>94</b> |
| 6     | ZnEt <sub>2</sub> (3.0 eq.)       | DMSO        | 70         | 76        |

<sup>a</sup> Reaction performed on 0.40 mmol scale. Isolated yields are given.

**Table S4** Optimization of the amount of diethylzinc <sup>a</sup>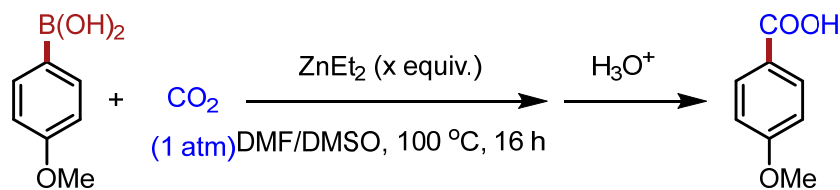

| Entry | Additive                          | Solvent     | T [°C]     | Yield [%] |
|-------|-----------------------------------|-------------|------------|-----------|
| 1     | ZnEt <sub>2</sub> (3.0 eq.)       | DMF         | 100        | 94        |
| 2     | ZnEt <sub>2</sub> (2.0 eq.)       | DMF         | 100        | 84        |
| 3     | ZnEt <sub>2</sub> (1.5 eq.)       | DMF         | 100        | 80        |
| 4     | ZnEt <sub>2</sub> (1.0 eq.)       | DMF         | 100        | 73        |
| 5     | ZnEt <sub>2</sub> (3.0 eq.)       | DMSO        | 100        | 94        |
| 6     | ZnEt <sub>2</sub> (2.0 eq.)       | DMSO        | 100        | 94        |
| 7     | <b>ZnEt<sub>2</sub> (1.5 eq.)</b> | <b>DMSO</b> | <b>100</b> | <b>94</b> |
| 8     | ZnEt <sub>2</sub> (1.2 eq.)       | DMSO        | 100        | 74        |
| 9     | ZnEt <sub>2</sub> (1.0 eq.)       | DMSO        | 100        | 62        |

<sup>a</sup> Reaction performed on 0.40 mmol scale. Isolated yields are given.

## 2. Mechanism Research

### Quenching experiment in the absence of CO<sub>2</sub>

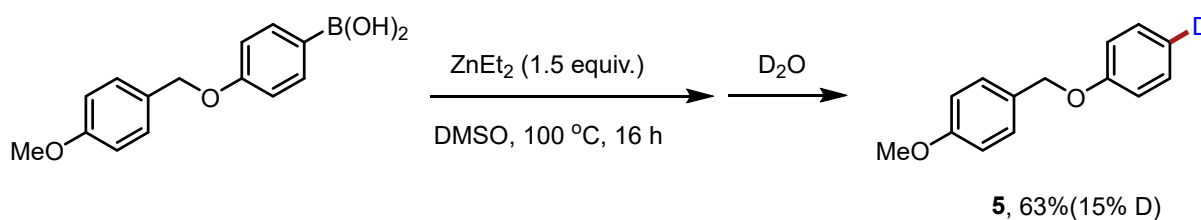

A 50 mL Schlenk tube was charged with (4-((4-methoxybenzyl)oxy)phenyl)boronic acid (**1e**, 103.2 mg, 0.4 mmol), and the tube was evacuated and refilled with Ar (3 times). DMSO (2.0 mL) and ZnEt<sub>2</sub> (2 M in toluene, 0.6 mmol, 1.5 equiv.) were then added, and the resulting mixture was stirred vigorously for 16 h at 100 °C. The reaction was quenched with D<sub>2</sub>O (4.0 mL), and the resulting mixture was stirred for 1 h. The organic layer was extracted with EtOAc (3 × 10 mL). The combined organic layer was passed through a pad of Na<sub>2</sub>SO<sub>4</sub>, then all volatiles

were removed under reduced pressure. The residue was purified by column chromatography to afford 1-((4-methoxybenzyl)oxy)benzene-4-*d* (**5**) as a white solid (54.2 mg, 63%).

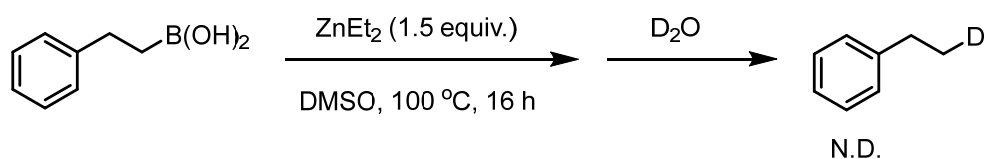

A 50 mL Schlenk tube was charged with phenethylboronic acid (60.0 mg, 0.4 mmol), and evacuated and refilled with Ar (3 times). DMSO (2.0 mL) and  $\text{ZnEt}_2$  (2 M in toluene, 0.6 mmol, 1.5 equiv.) were then added, and the resulting mixture was stirred vigorously for 16 h at  $100\text{ }^\circ\text{C}$ . The reaction was quenched with  $\text{D}_2\text{O}$  (4.0 mL), and the resulting mixture was stirred for 1 h. The organic layer was extracted with EtOAc ( $3 \times 10\text{ mL}$ ) and the combined organic layer was passed through a pad of  $\text{Na}_2\text{SO}_4$ . Then, organic layer was detected by GC-MS.

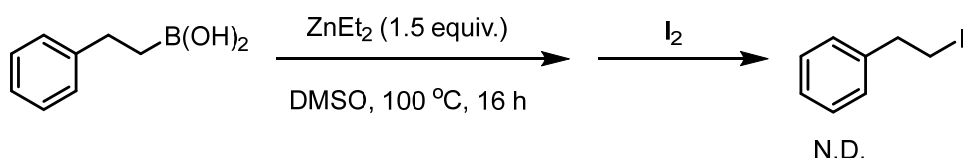

A 50 mL Schlenk tube was charged with phenethylboronic acid (60.0 mg, 0.4 mmol), and evacuated and refilled with Ar (3 times). DMSO (2.0 mL) and  $\text{ZnEt}_2$  (2 M in toluene, 0.6 mmol, 1.5 equiv.) were then added, and the resulting mixture was stirred vigorously for 16 h at  $100\text{ }^\circ\text{C}$ . The reaction was quenched with  $\text{I}_2$  (1.2 mmol, 3.0 equiv. in DMSO), and the resulting mixture was stirred for 1 h. Then, 30 mL saturated  $\text{NaS}_2\text{O}_3$  aqueous solution was added and stirred for 30 min. The organic layer was extracted with EtOAc ( $3 \times 10\text{ mL}$ ) and the combined organic layer was passed through a pad of  $\text{Na}_2\text{SO}_4$ . Then, organic layer was detected by GC-MS.

### Preparation of $\text{PhZnEt}$ solution<sup>1</sup>

A dry and nitrogen flushed 100 mL three-necked flask, equipped with a magnetic stirrer, a thermometer, a nitrogen inlet, and a septum, was charged with zinc chloride (817.8 mg, 6 mmol, 1 equiv.) and THF (6 mL). After exothermic dissolution of zinc chloride in THF, phenylmagnesium bromide (6.3 mL, 1 M, 6.3 mmol, 1.05 equiv.) was added dropwise at room temperature. Stirring was continued for 15 min, then, ethylmagnesium chloride (3.1 mL, 2 M, 6.3 mmol, 1.05 equiv.) was added dropwise at room temperature. After completion of the addition, the reaction mixture was stirred for 15 min.

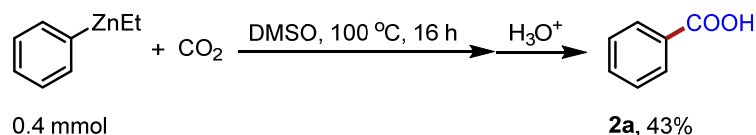

An oven-dried 50 mL Schlenk tube containing a stirring bar was evacuated and back-filled under CO<sub>2</sub> flow (this procedure was repeated three times). Then, anhydrous DMSO (1.0 mL) and PhZnEt (0.4 mmol, 1.0 equiv, 0.4 M in THF) was added under CO<sub>2</sub> flow, and the resulting mixture was stirred at 100 °C for 16 h. Then, the mixture was carefully quenched with 1 M HCl and stirred for 5 minutes. The reaction mixture was extracted five times with EtOAc and the combined organic phases were washed with brine, dried over anhydrous Na<sub>2</sub>SO<sub>4</sub> and filtered. The solvent was then removed under reduced pressure. The crude products were purified by flash chromatography affording benzoic acid (**2a**) in 43% yield.

## References

- (1) Cahiez, G.; Foulgoc, L.; Moyeux, A. Iron-Catalyzed Oxidative Heterocoupling between Aliphatic and Aromatic Organozinc Reagents: A Novel Pathway for Functionalized Aryl-Alkyl Cross-Coupling Reactions. *Angew. Chem. Int. Ed.* **2009**, *48*, 2969-2972.

# Copies of $^1\text{H}$ , $^{13}\text{C}$ and $^{19}\text{F}$ NMR Spectra for Compounds

$^1\text{H}$  NMR (400 MHz,  $\text{DMSO-}d_6$ ) spectrum of **2a**

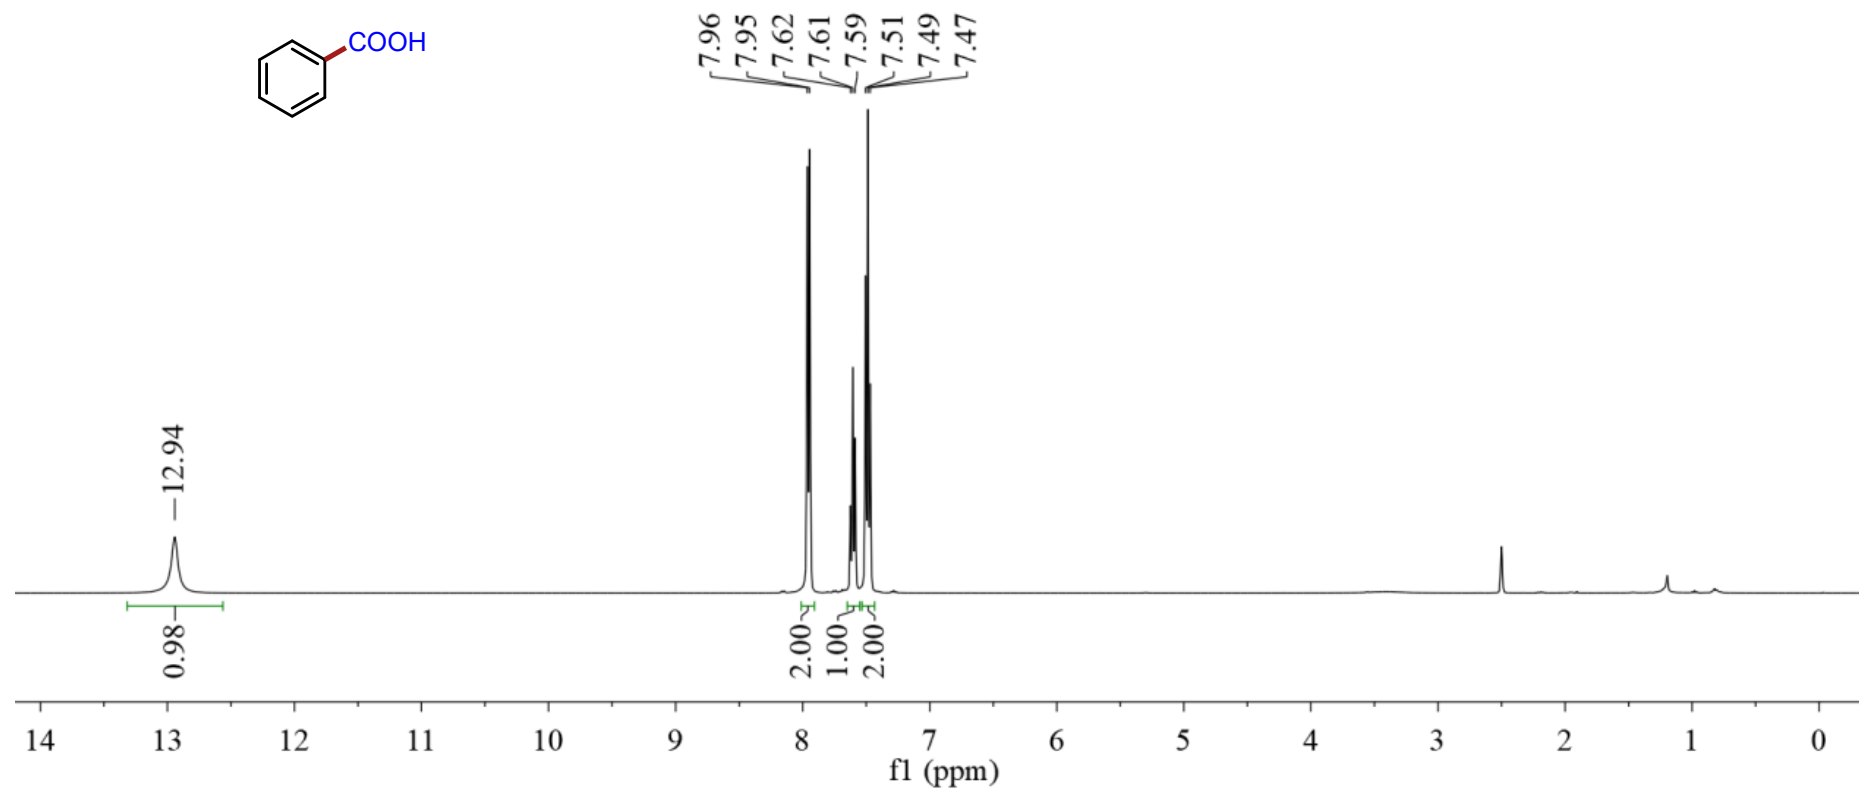

$^{13}\text{C}$  NMR (101 MHz,  $\text{DMSO-}d_6$ ) spectrum of **2a**

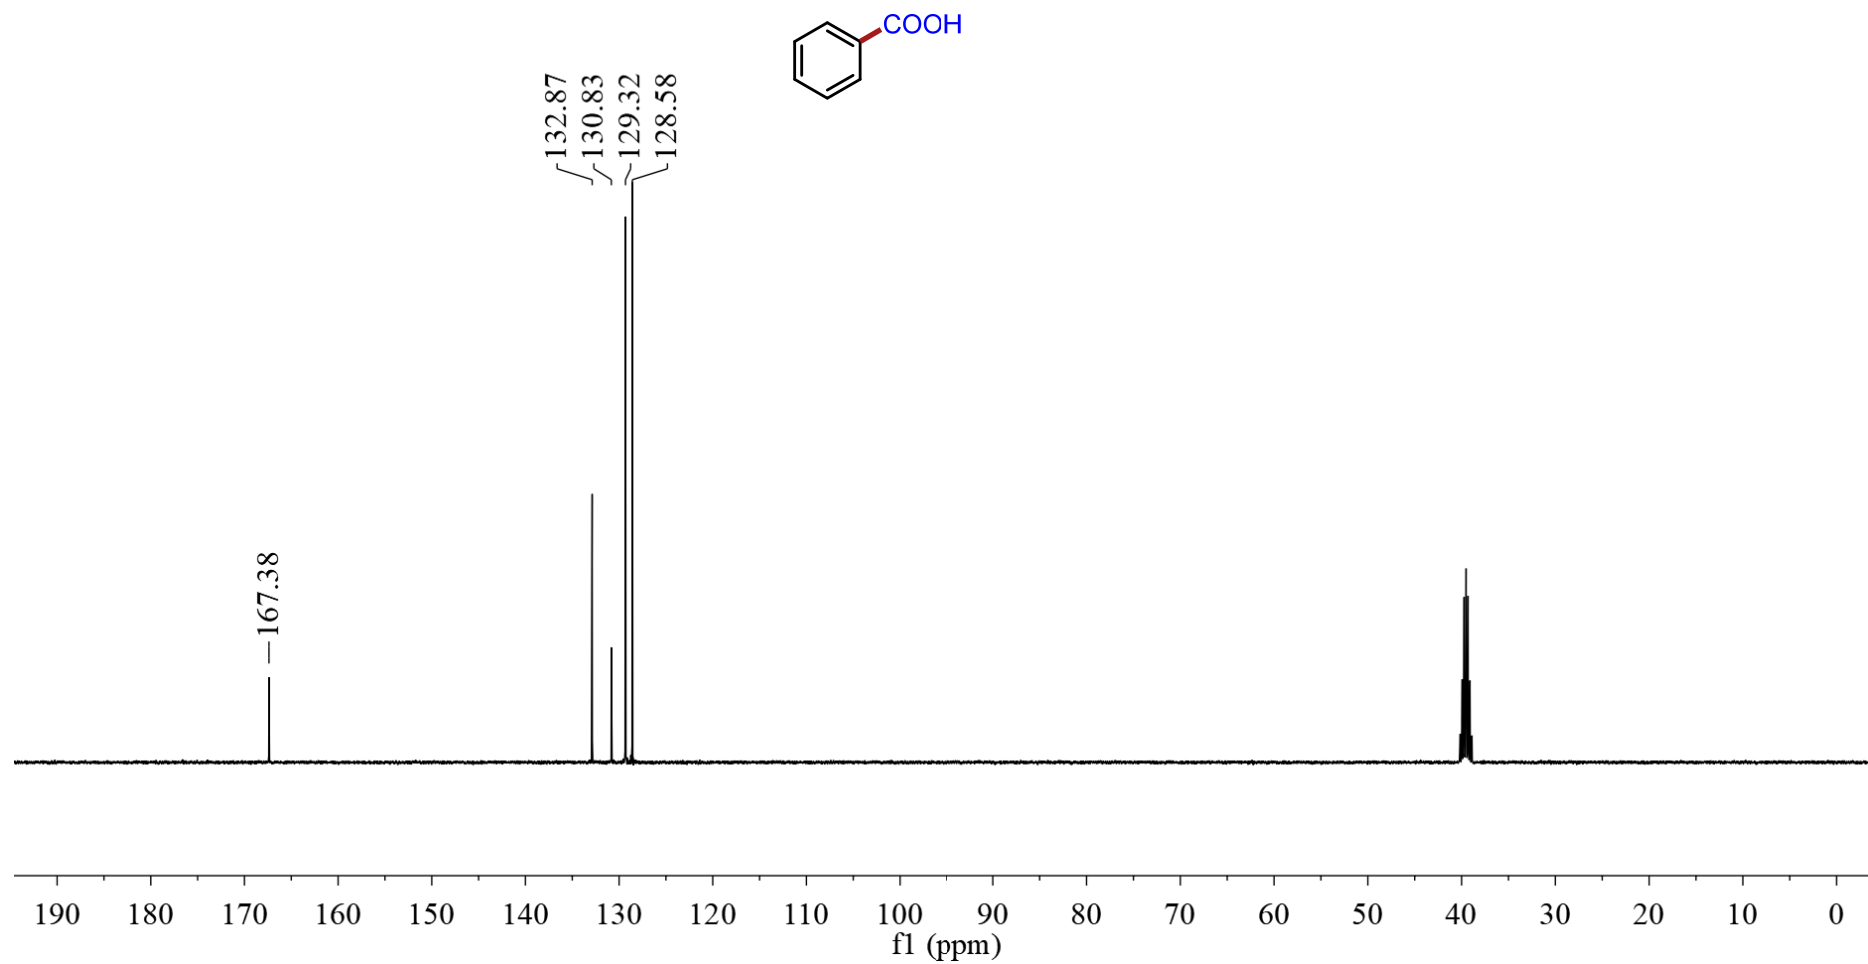



$^1\text{H}$  NMR (400 MHz,  $\text{DMSO-}d_6$ ) spectrum of **2b**

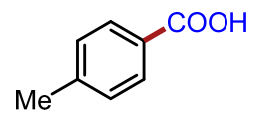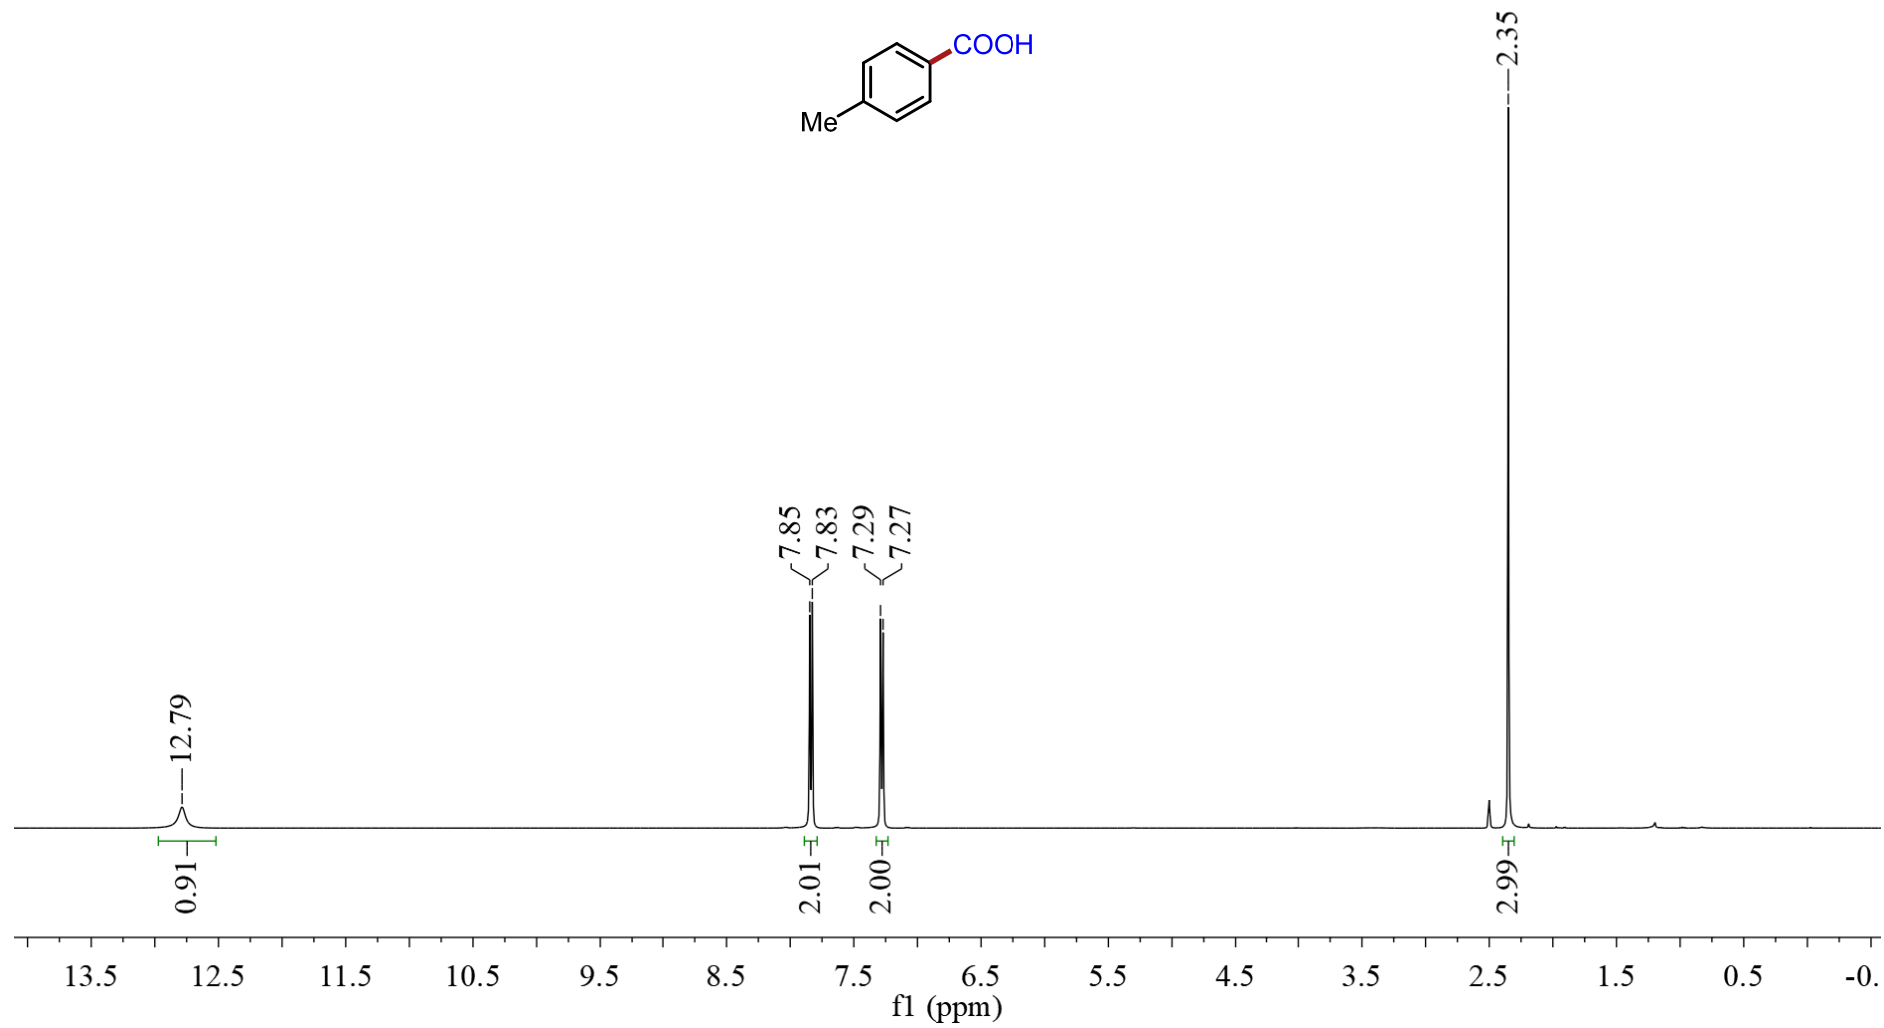

$^{13}\text{C}$  NMR (101 MHz,  $\text{DMSO-}d_6$ ) spectrum of **2b**

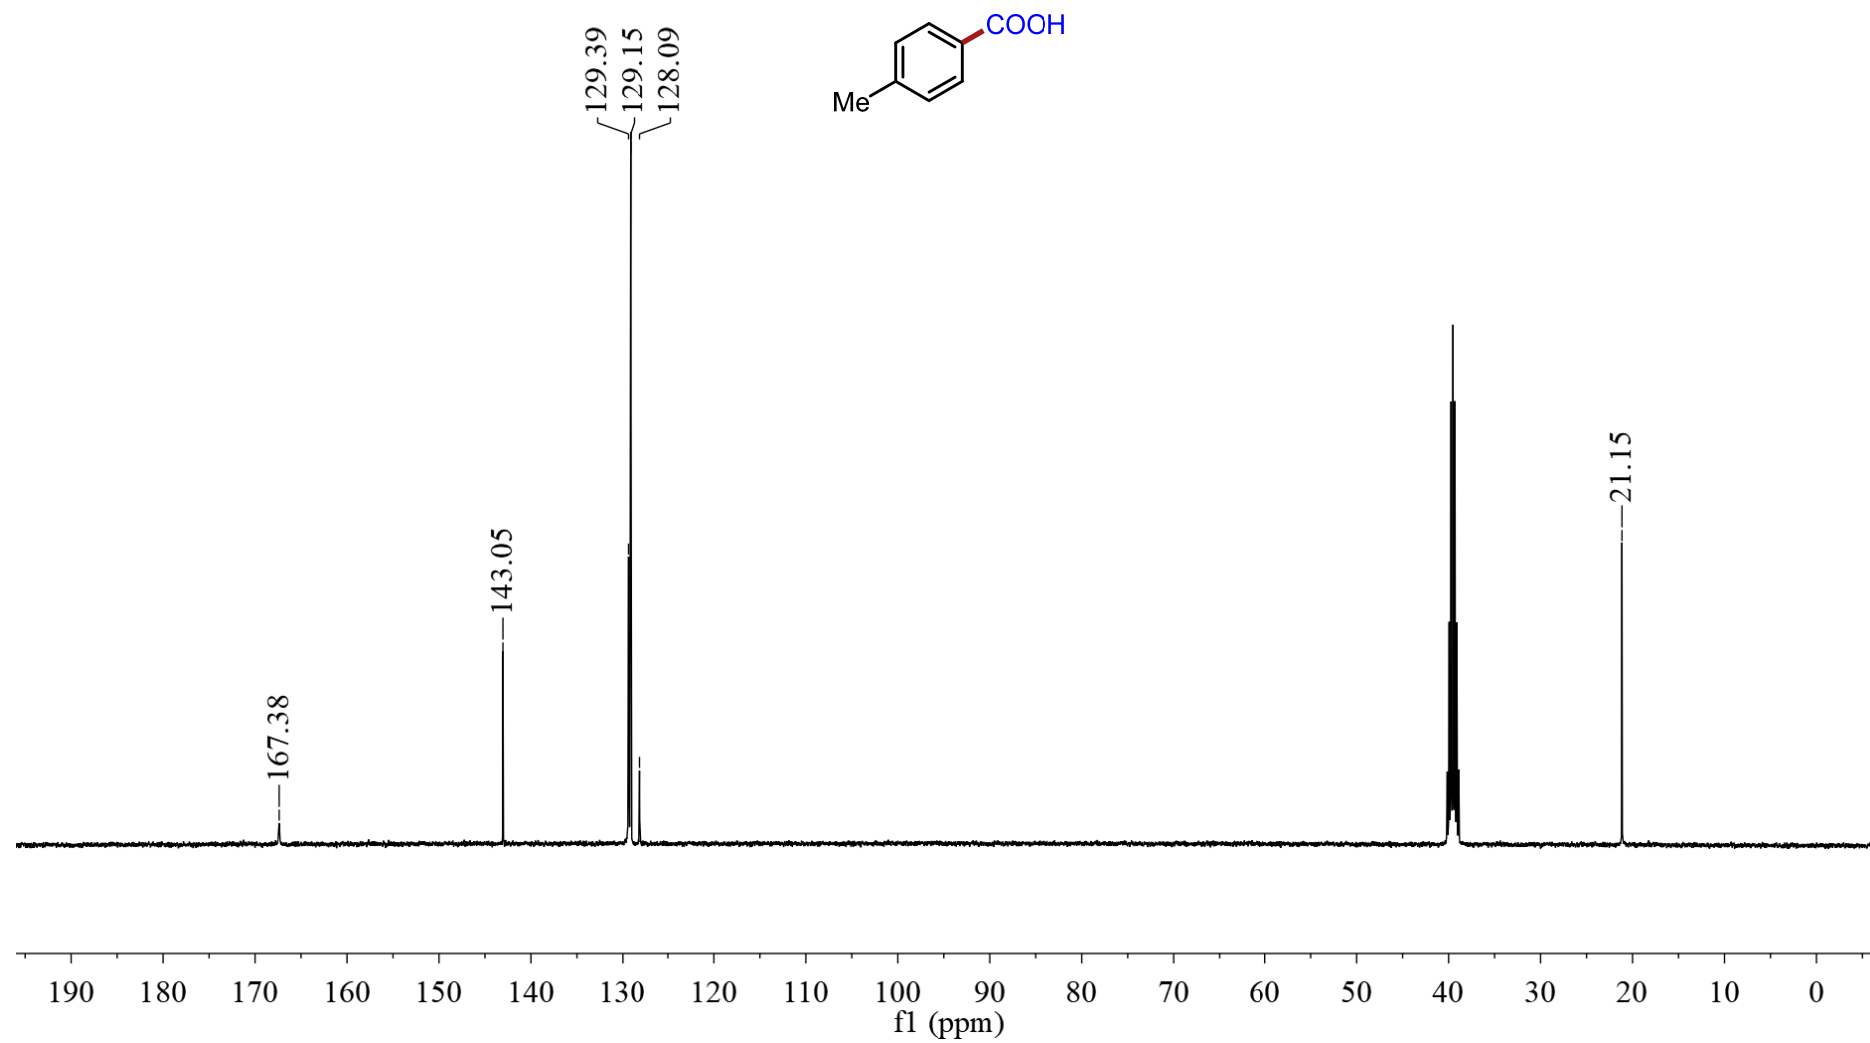

$^1\text{H}$  NMR (400 MHz,  $\text{DMSO-}d_6$ ) spectrum of **2c**

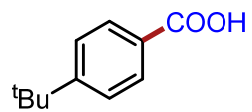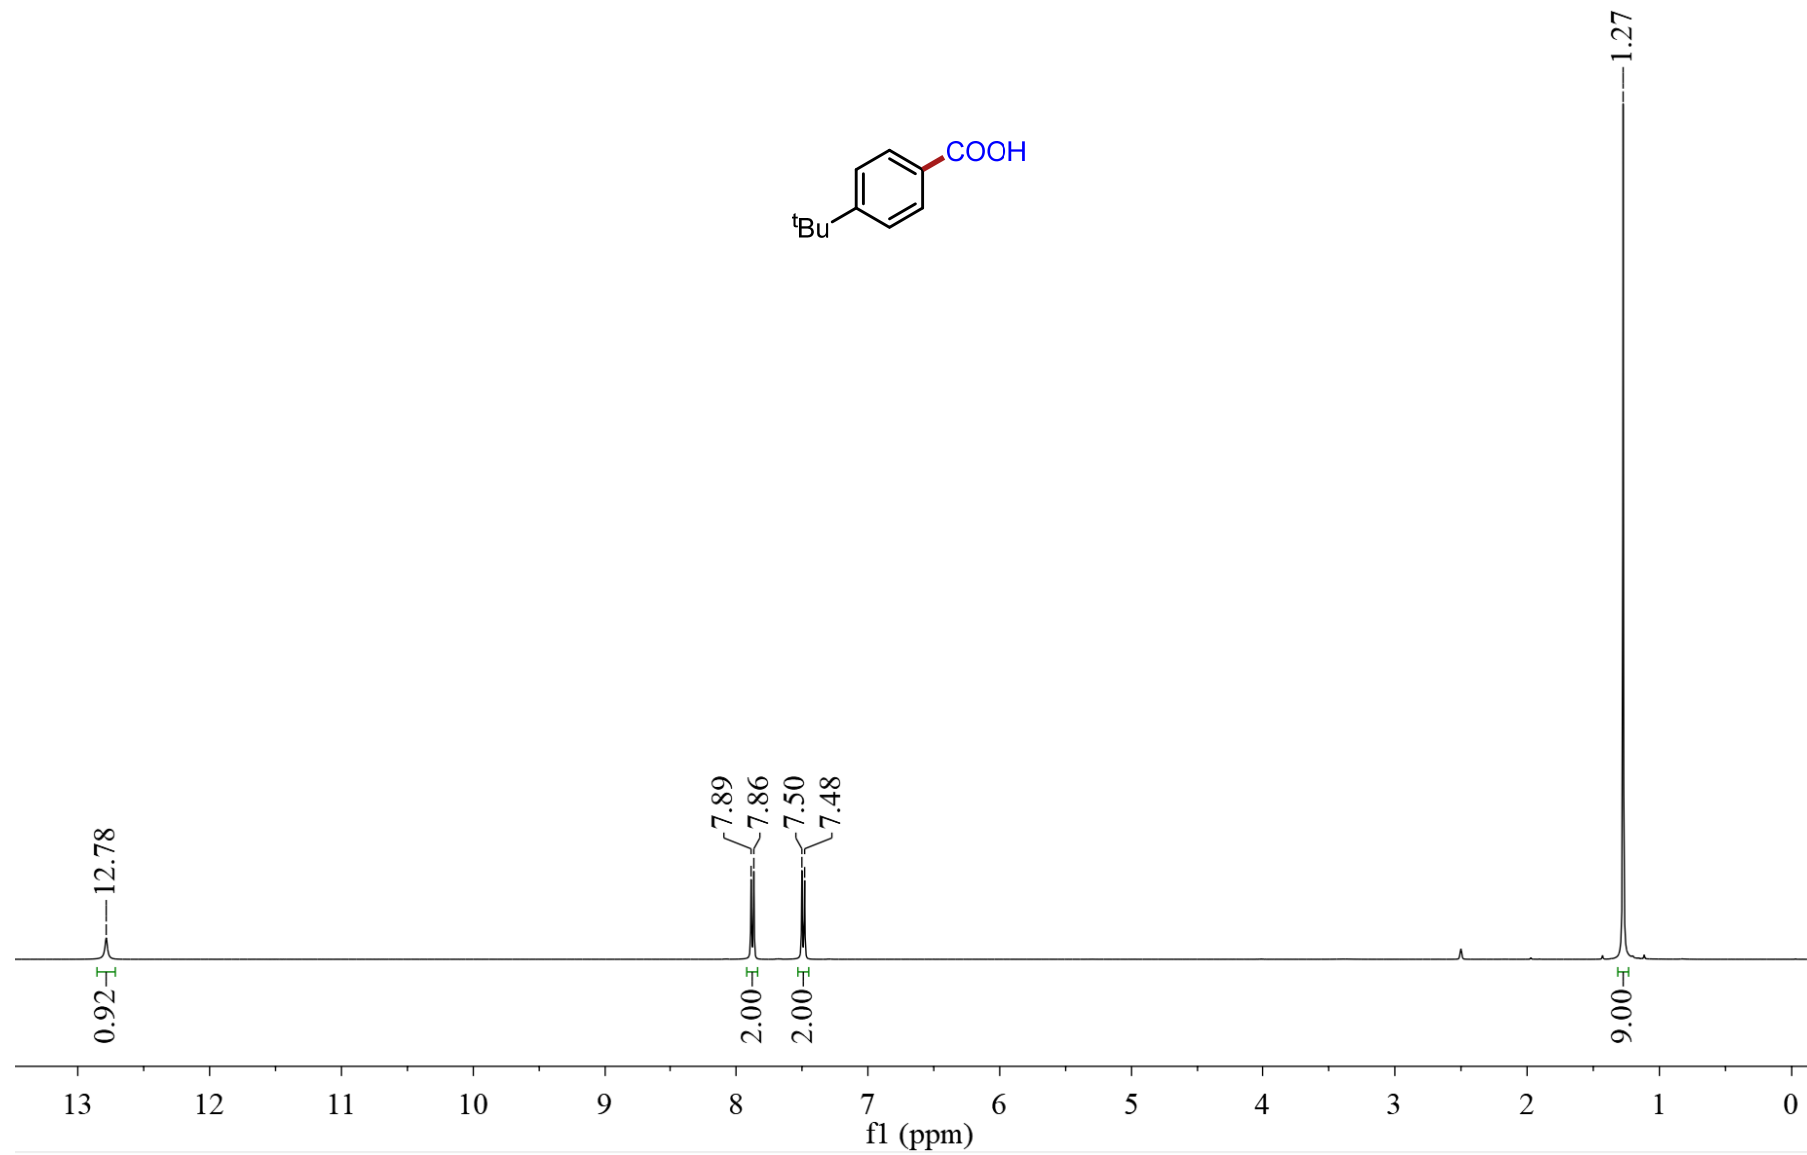

$^{13}\text{C}$  NMR (101 MHz,  $\text{DMSO-}d_6$ ) spectrum of **2c**

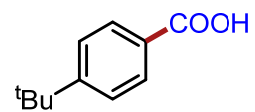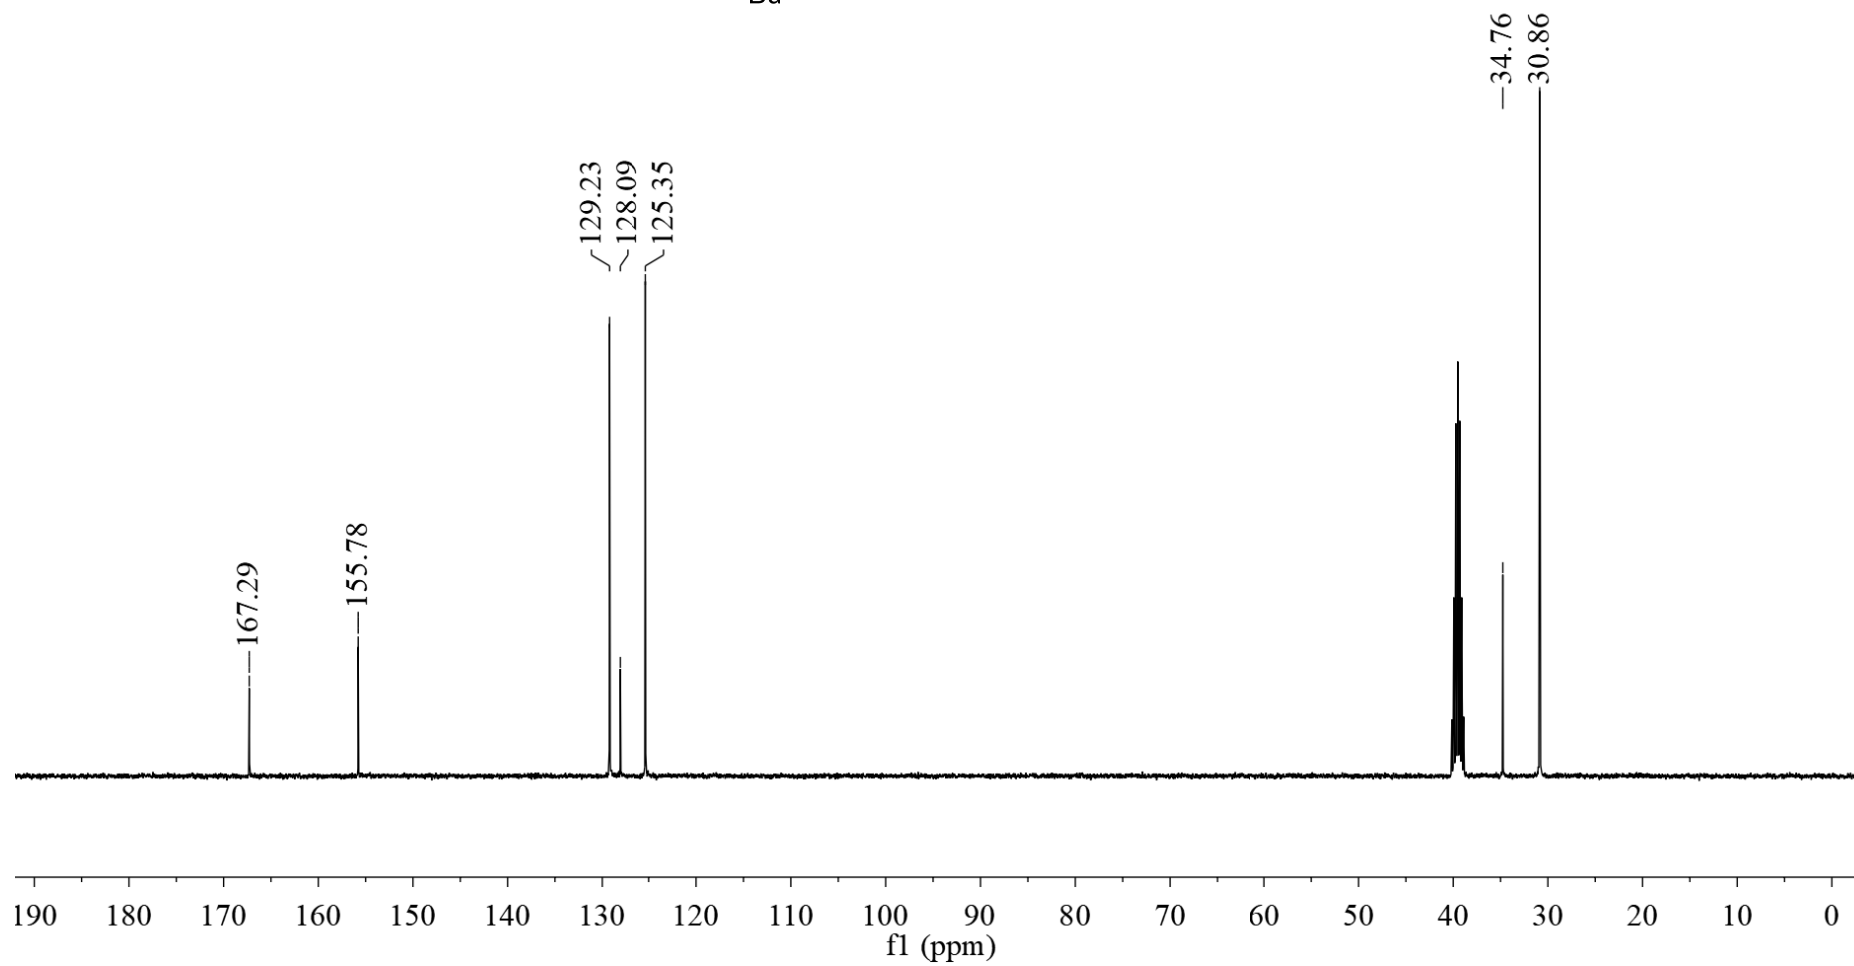

$^1\text{H}$  NMR (400 MHz,  $\text{DMSO-}d_6$ ) spectrum of **2d**

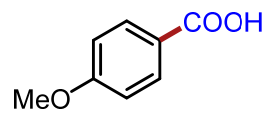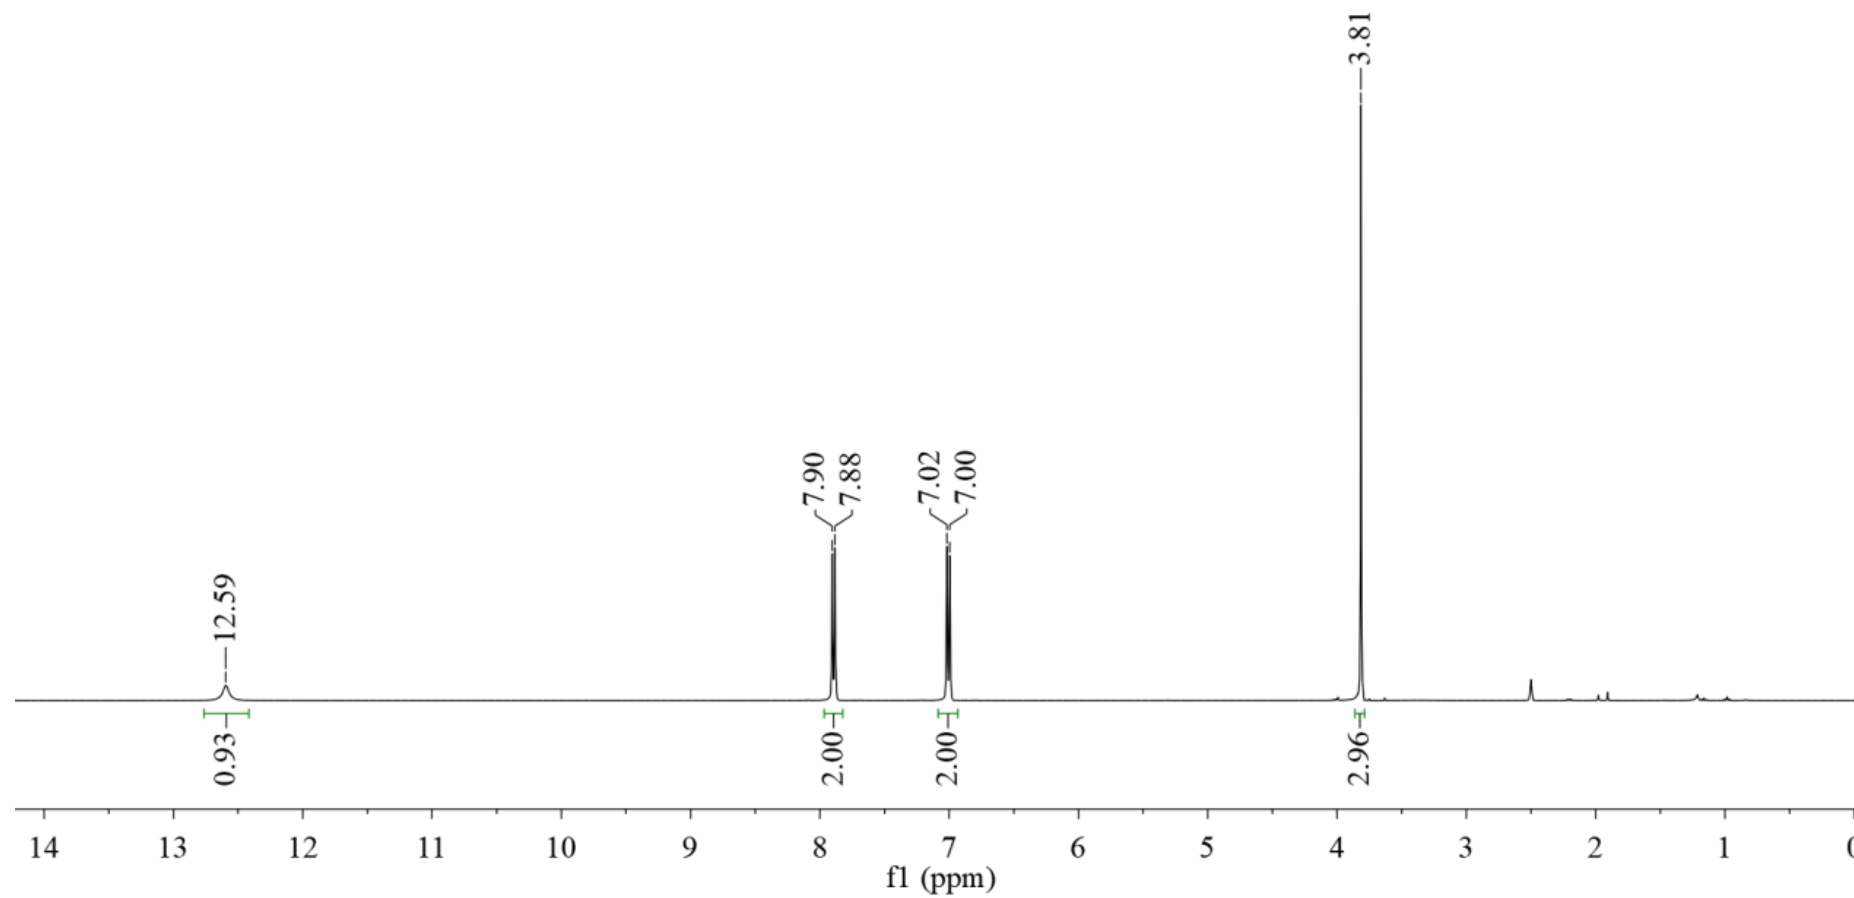

$^{13}\text{C}$  NMR (101 MHz,  $\text{DMSO-}d_6$ ) spectrum of **2d**

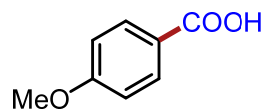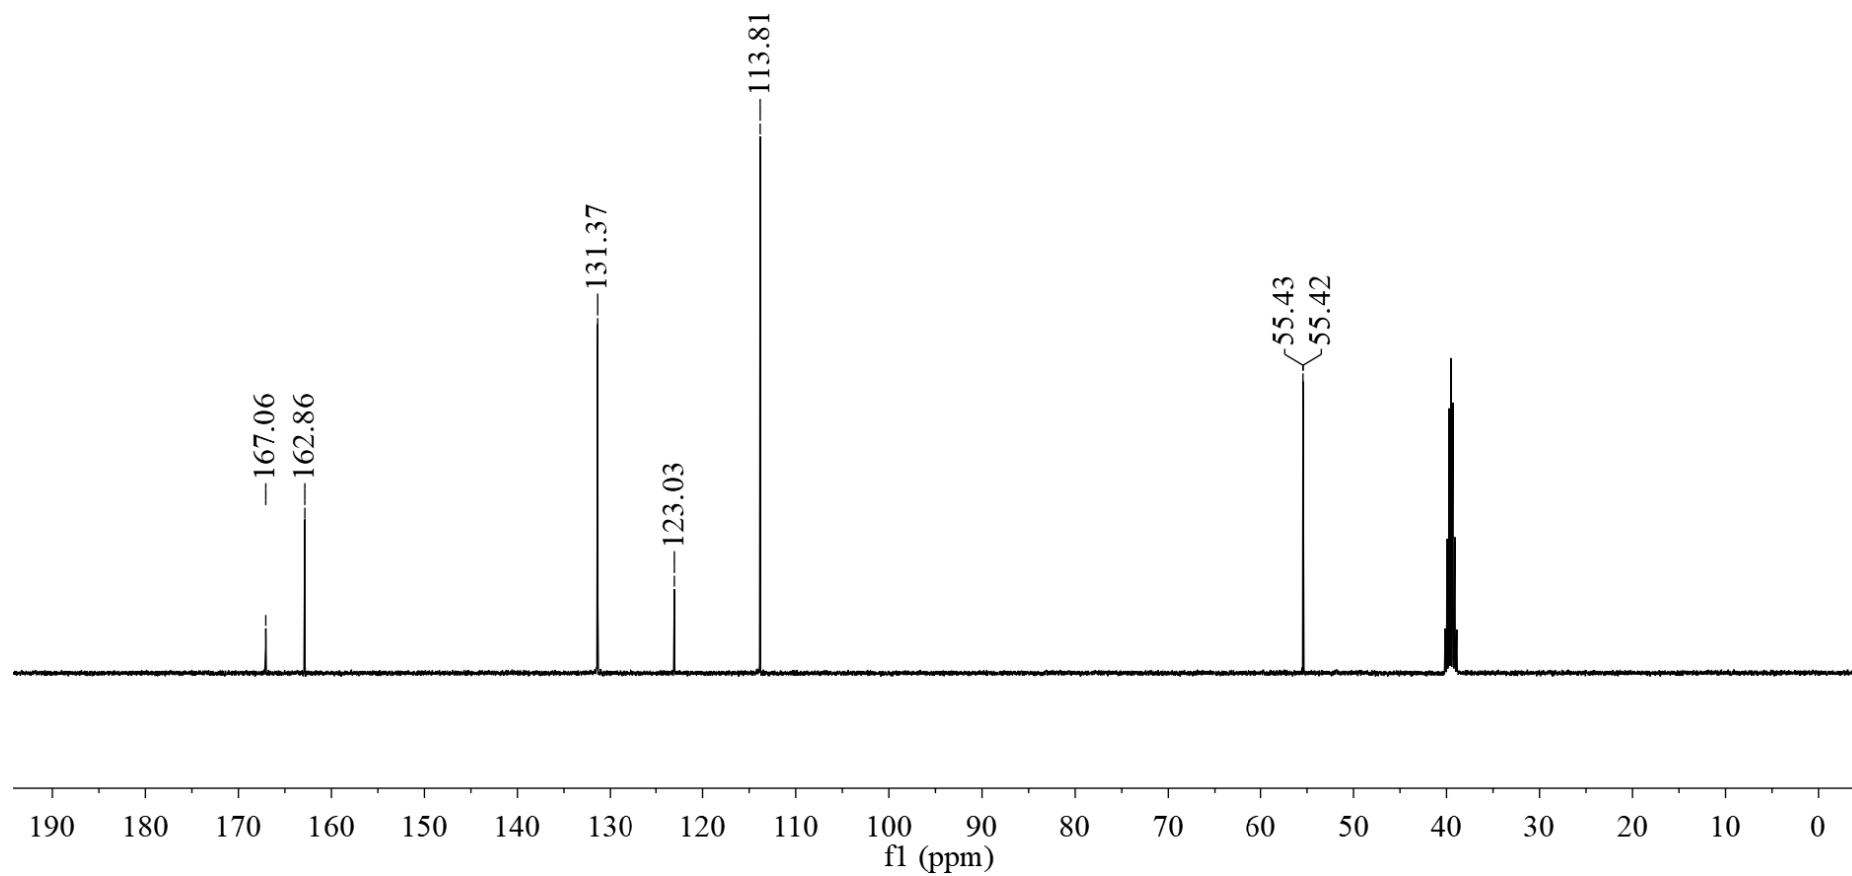

$^1\text{H}$  NMR (400 MHz,  $\text{DMSO-}d_6$ ) spectrum of **2e**

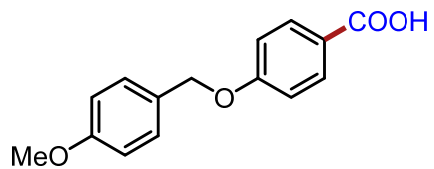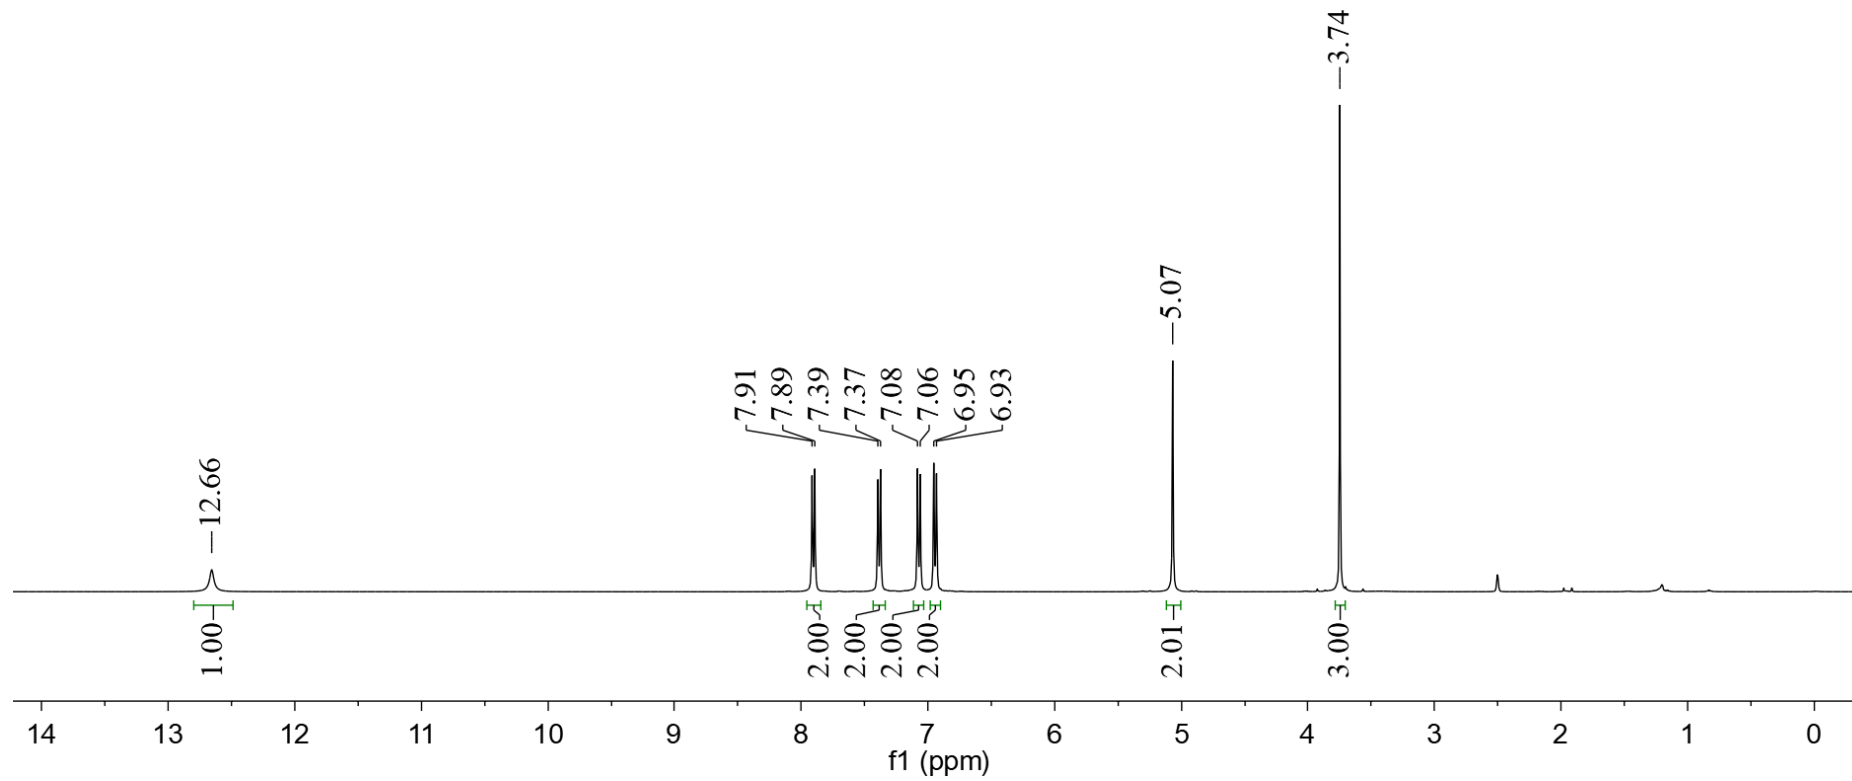

$^{13}\text{C}$  NMR (101 MHz,  $\text{DMSO-}d_6$ ) spectrum of **2e**

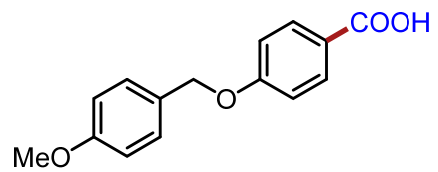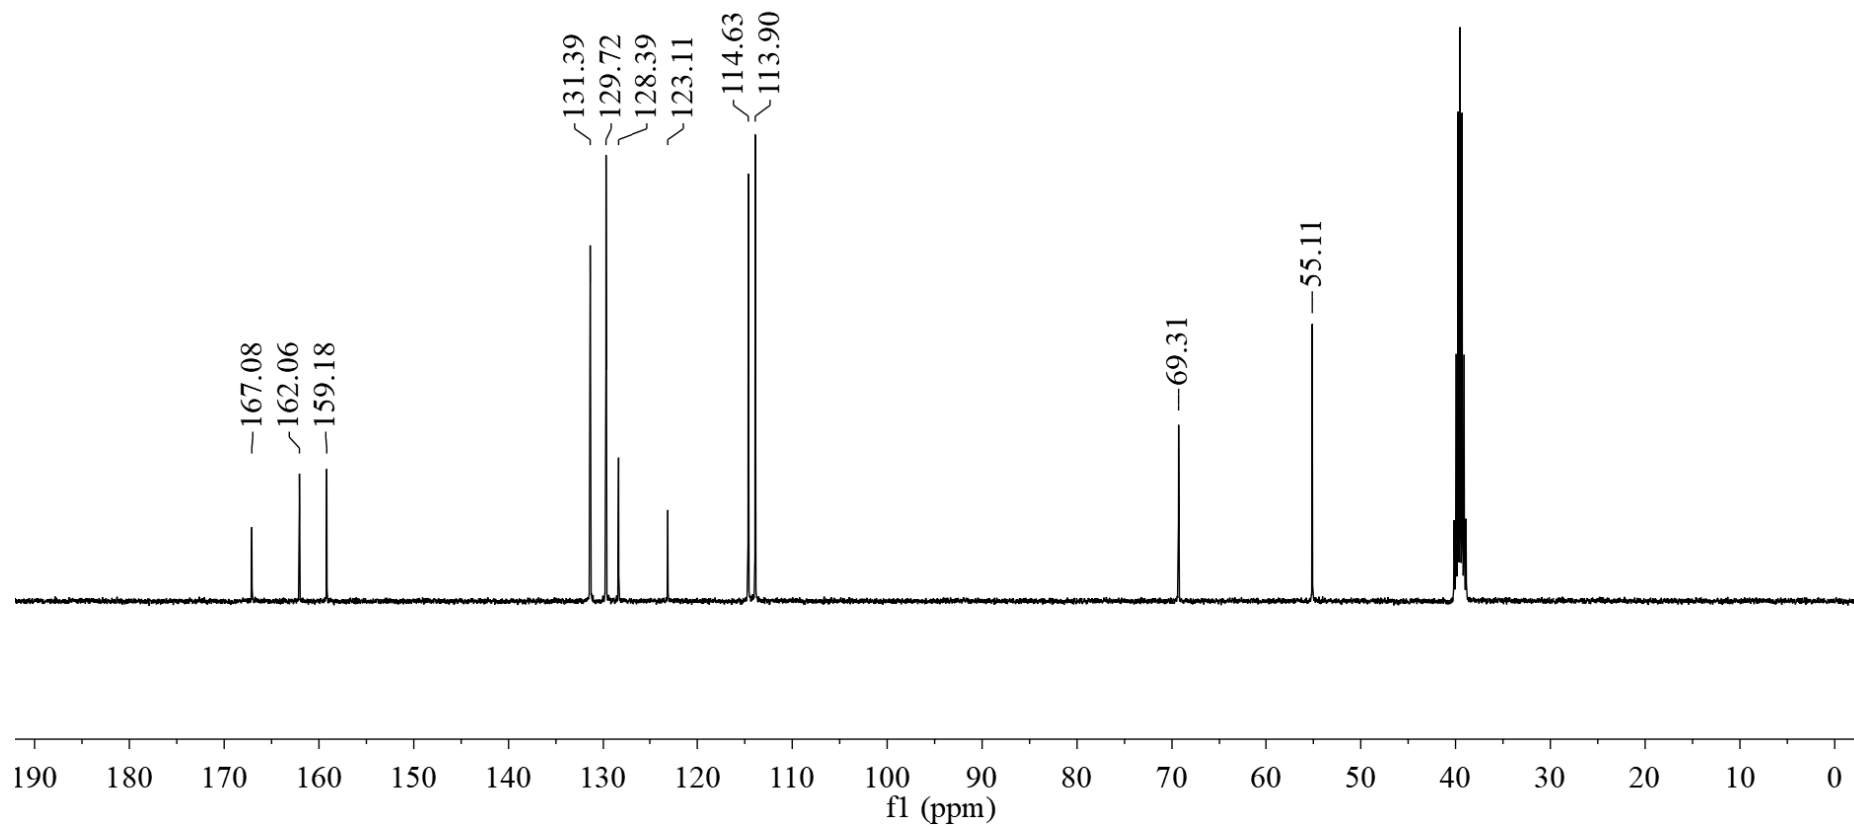



$^1\text{H}$  NMR (400 MHz,  $\text{DMSO-}d_6$ ) spectrum of **2f**

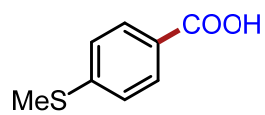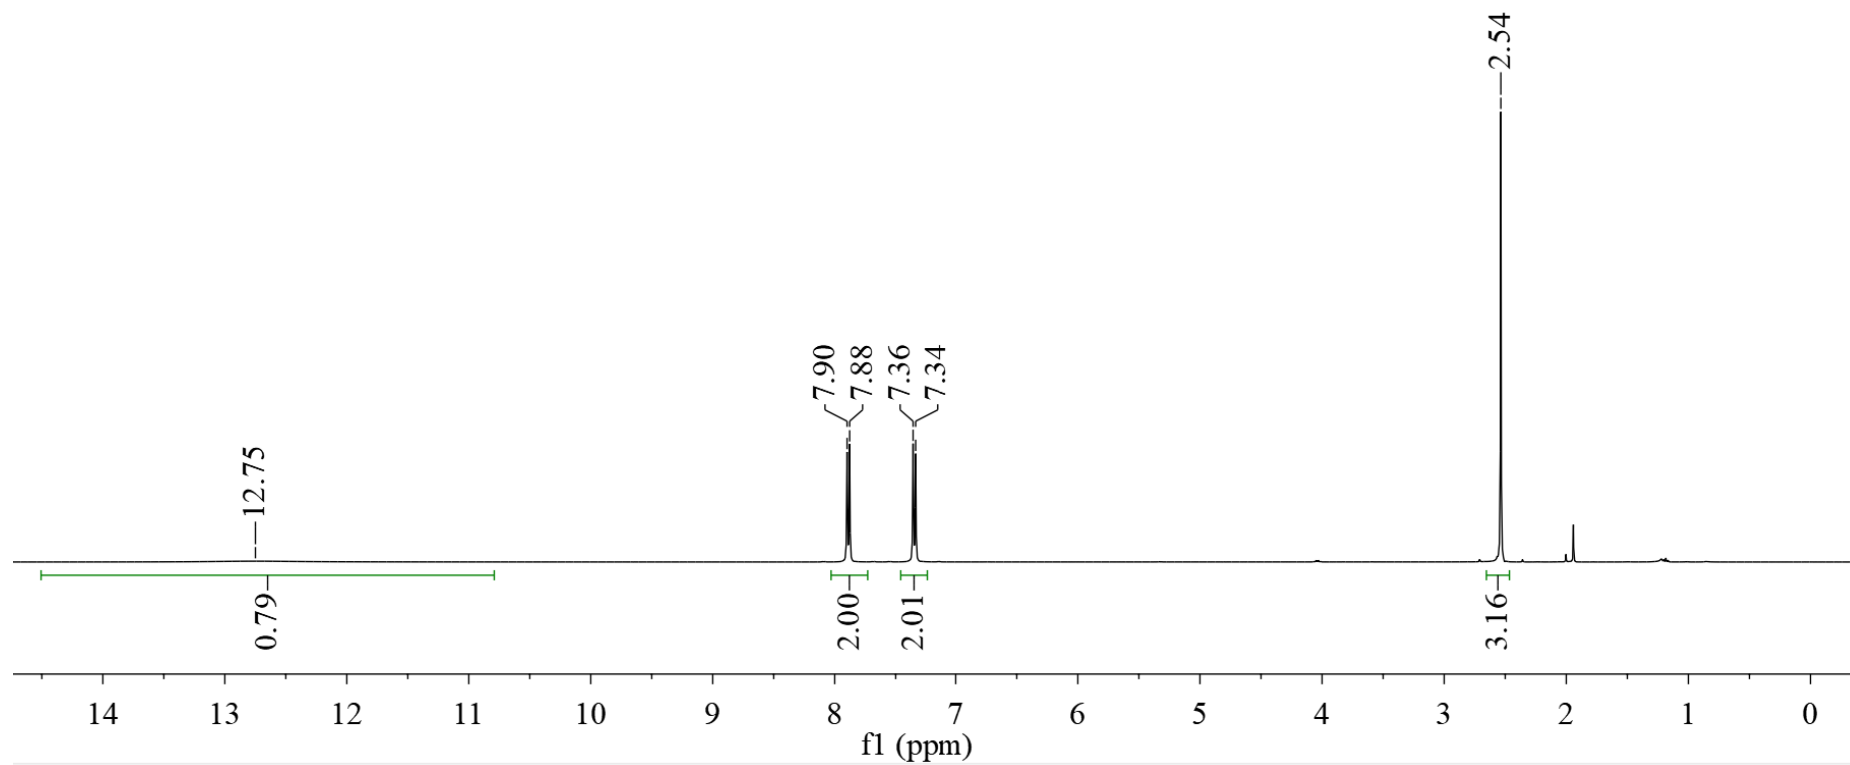

$^{13}\text{C}$  NMR (101 MHz,  $\text{DMSO-}d_6$ ) spectrum of **2f**

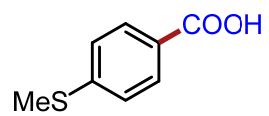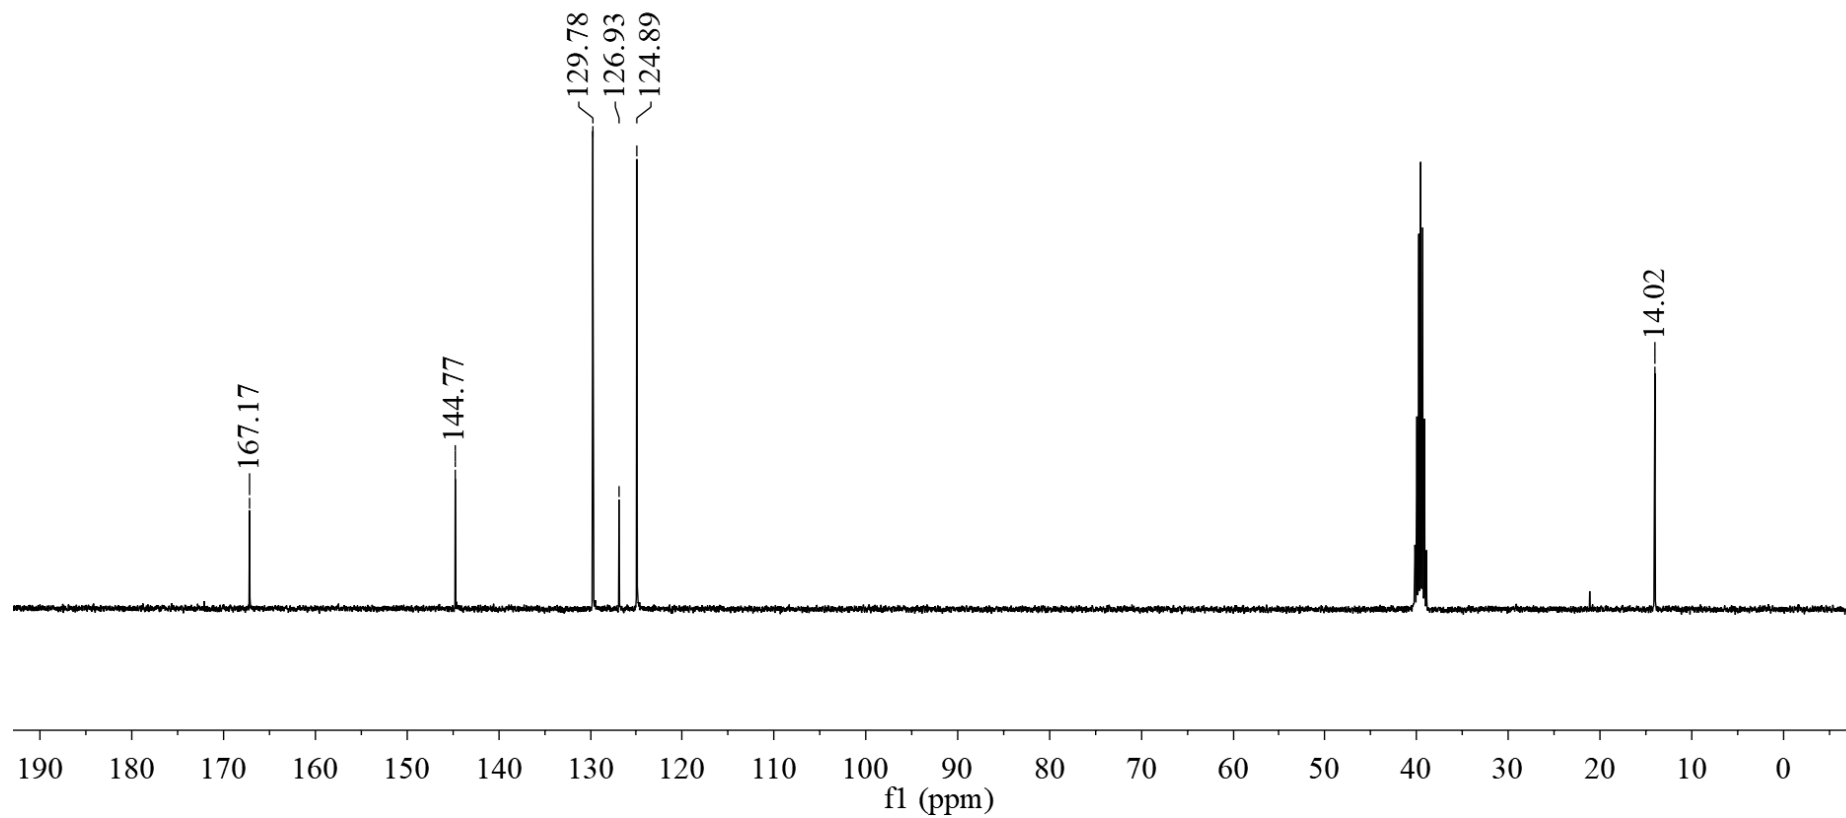

$^1\text{H}$  NMR (400 MHz,  $\text{DMSO-}d_6$ ) spectrum of **2g**

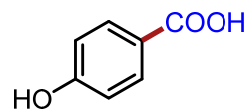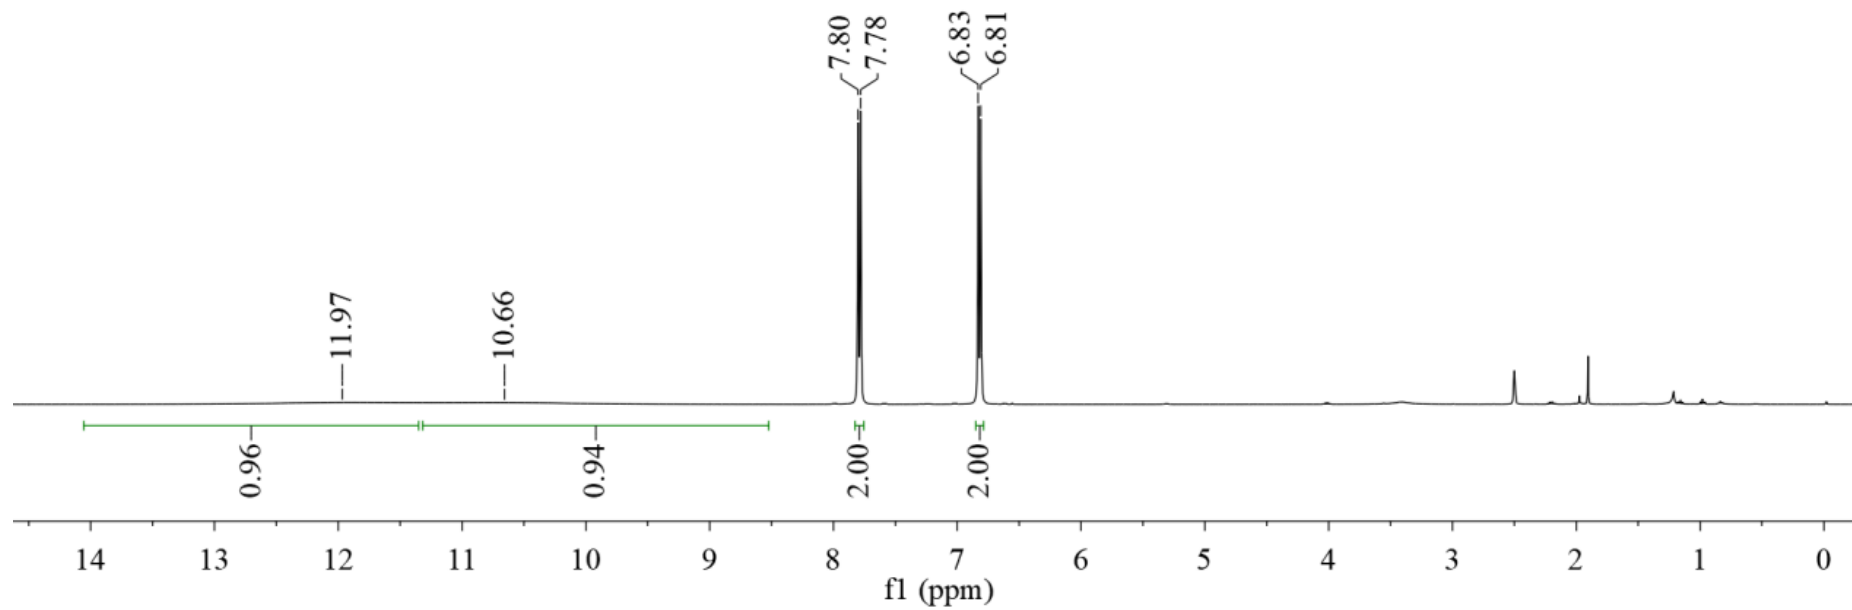

$^{13}\text{C}$  NMR (101 MHz,  $\text{DMSO-}d_6$ ) spectrum of **2g**

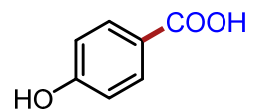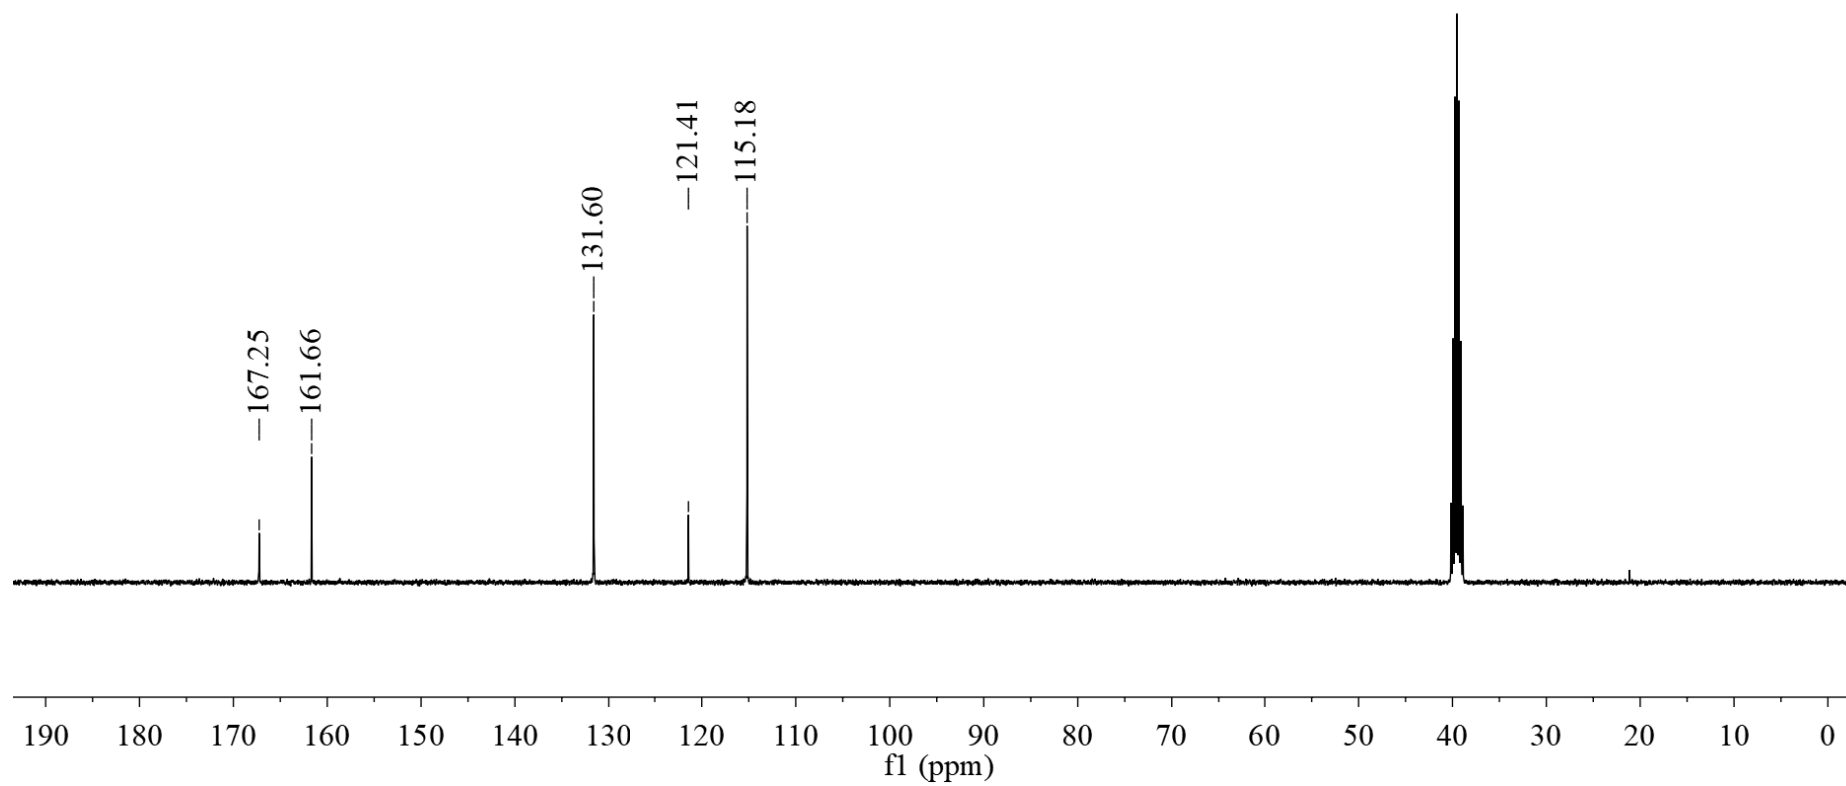

$^1\text{H}$  NMR (400 MHz,  $\text{DMSO-}d_6$ ) spectrum of **2h**

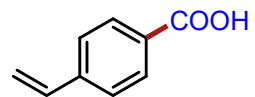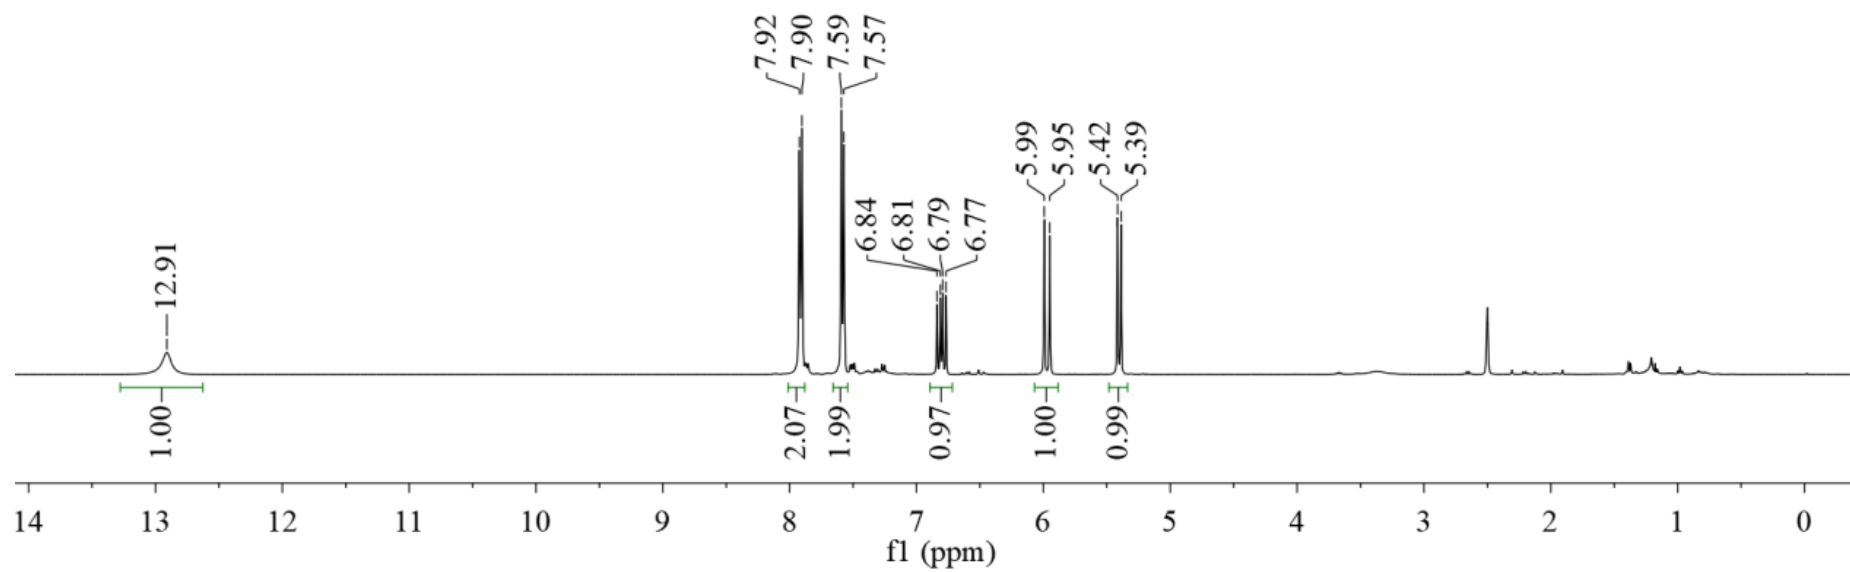

$^{13}\text{C}$  NMR (101 MHz,  $\text{DMSO-}d_6$ ) spectrum of **2h**

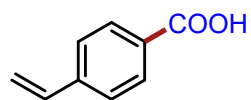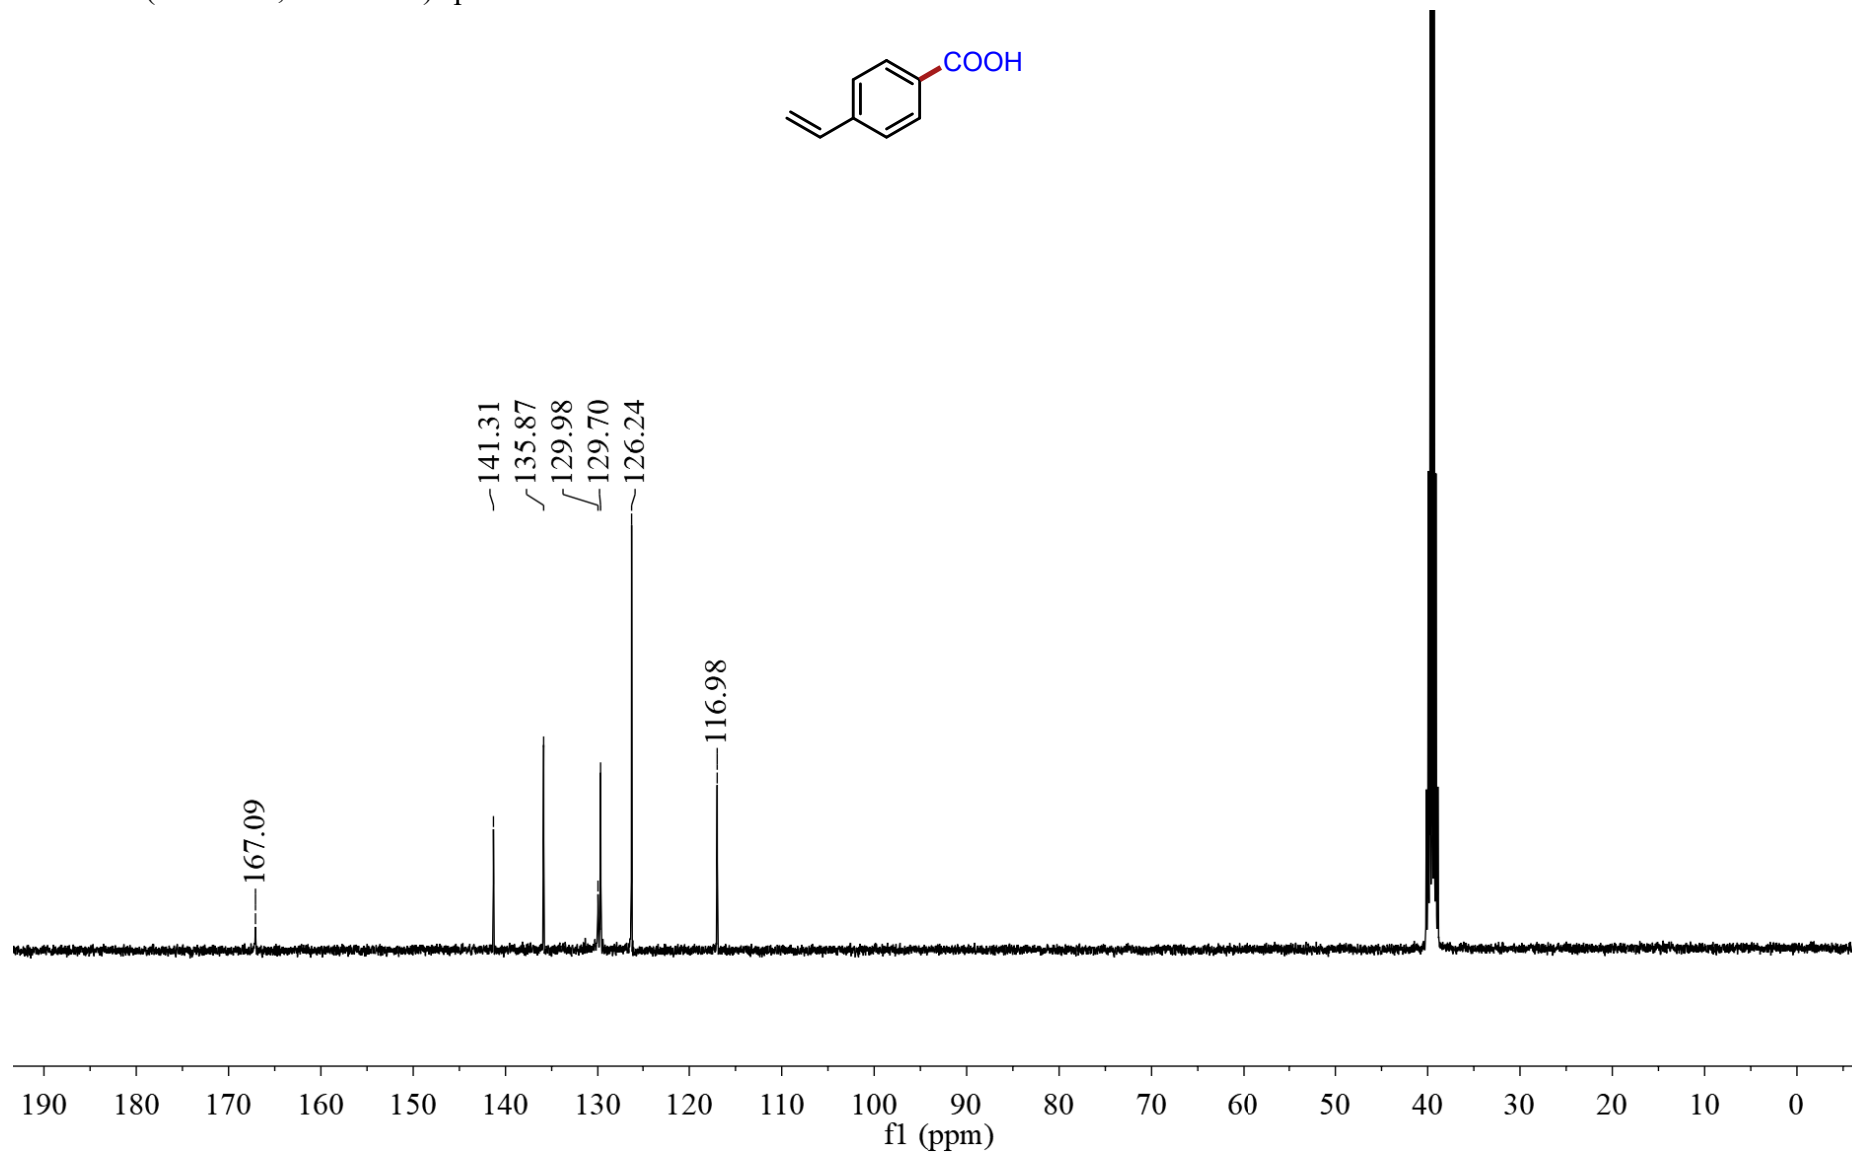

$^1\text{H}$  NMR (400 MHz,  $\text{DMSO-}d_6$ ) spectrum of **2i**

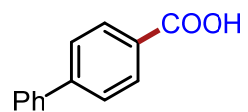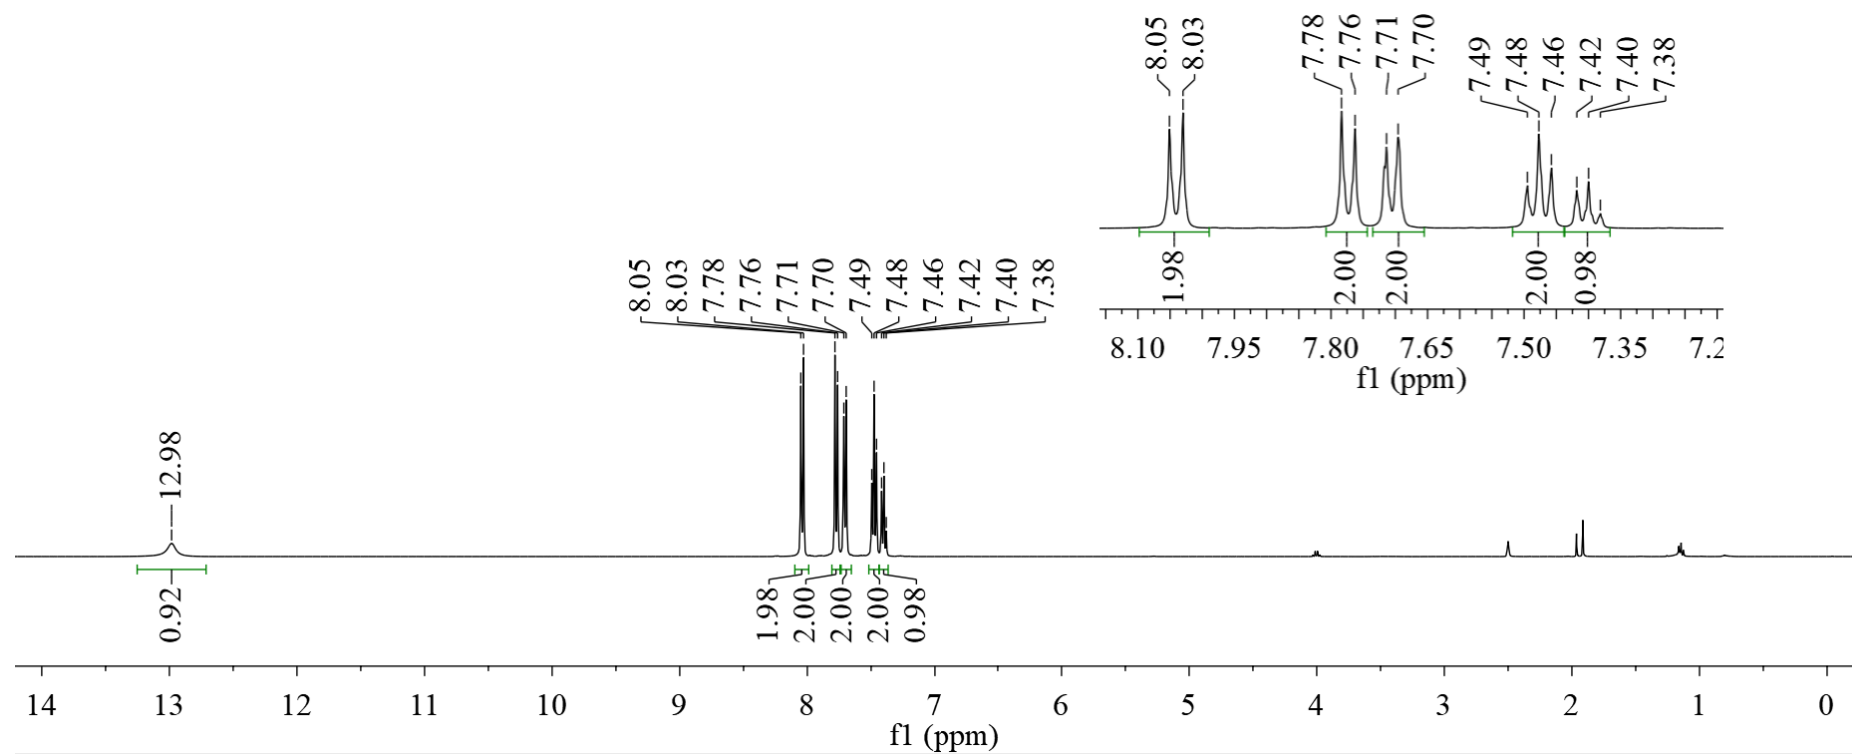

$^{13}\text{C}$  NMR (101 MHz,  $\text{DMSO-}d_6$ ) spectrum of **2i**

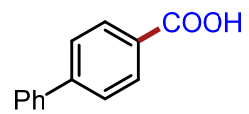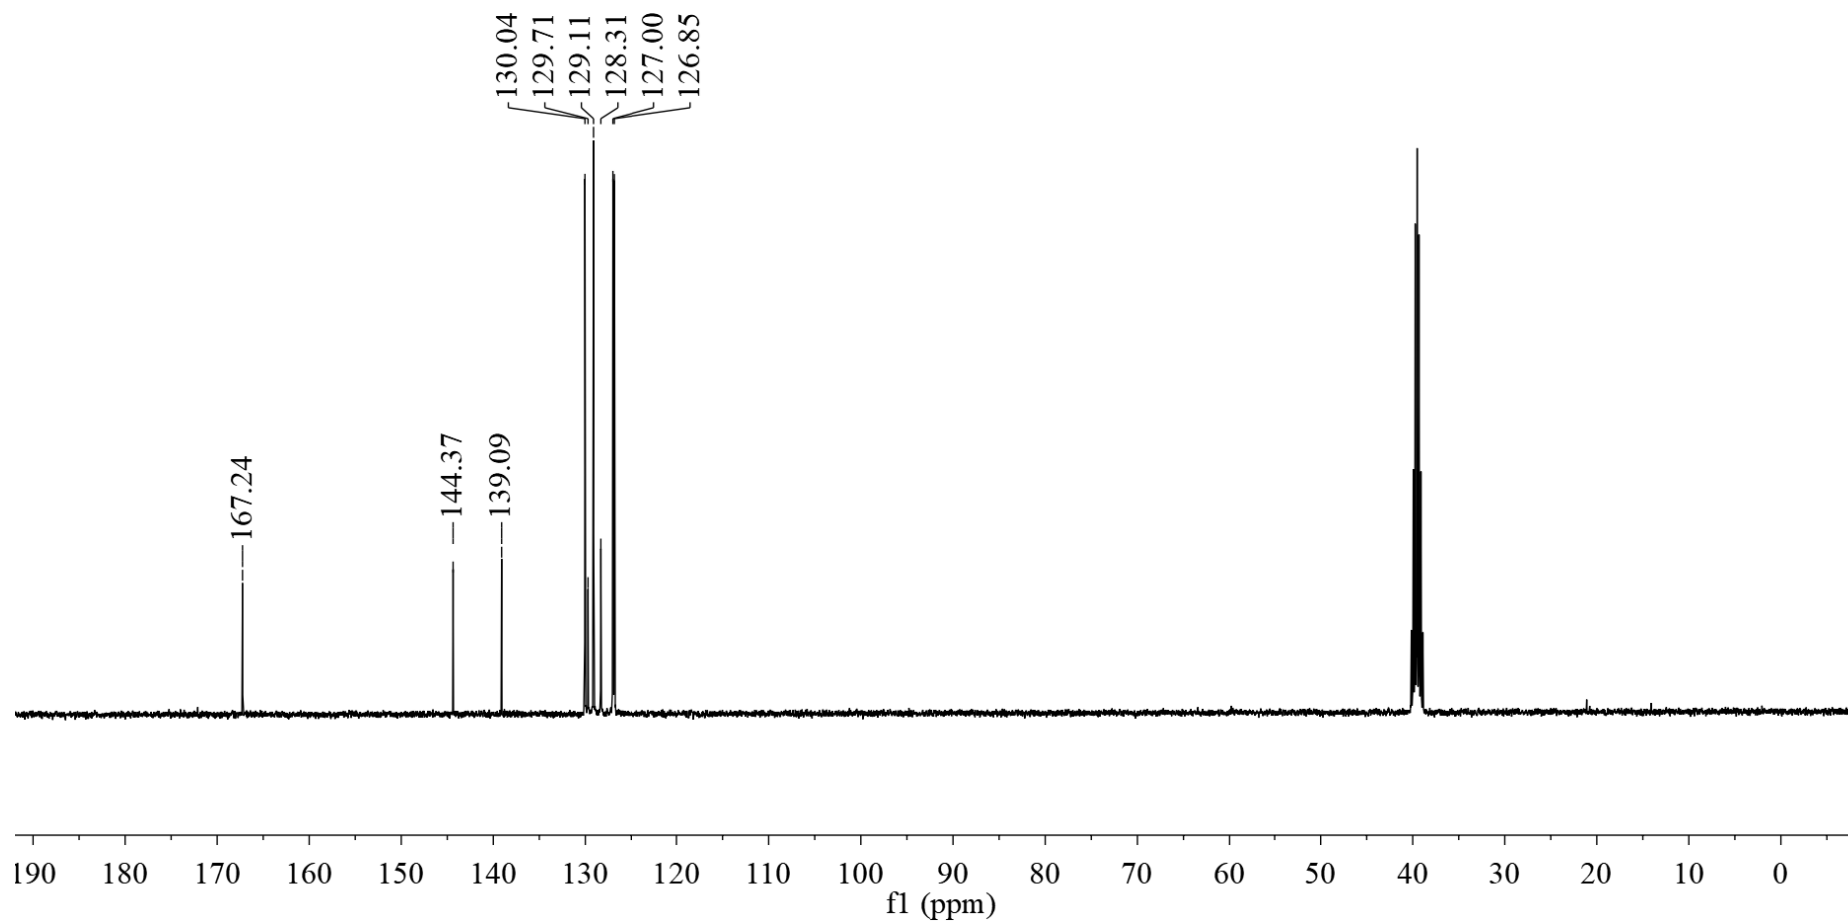



$^1\text{H}$  NMR (400 MHz,  $\text{DMSO-}d_6$ ) spectrum of **2j**

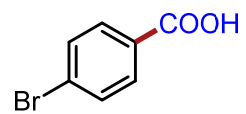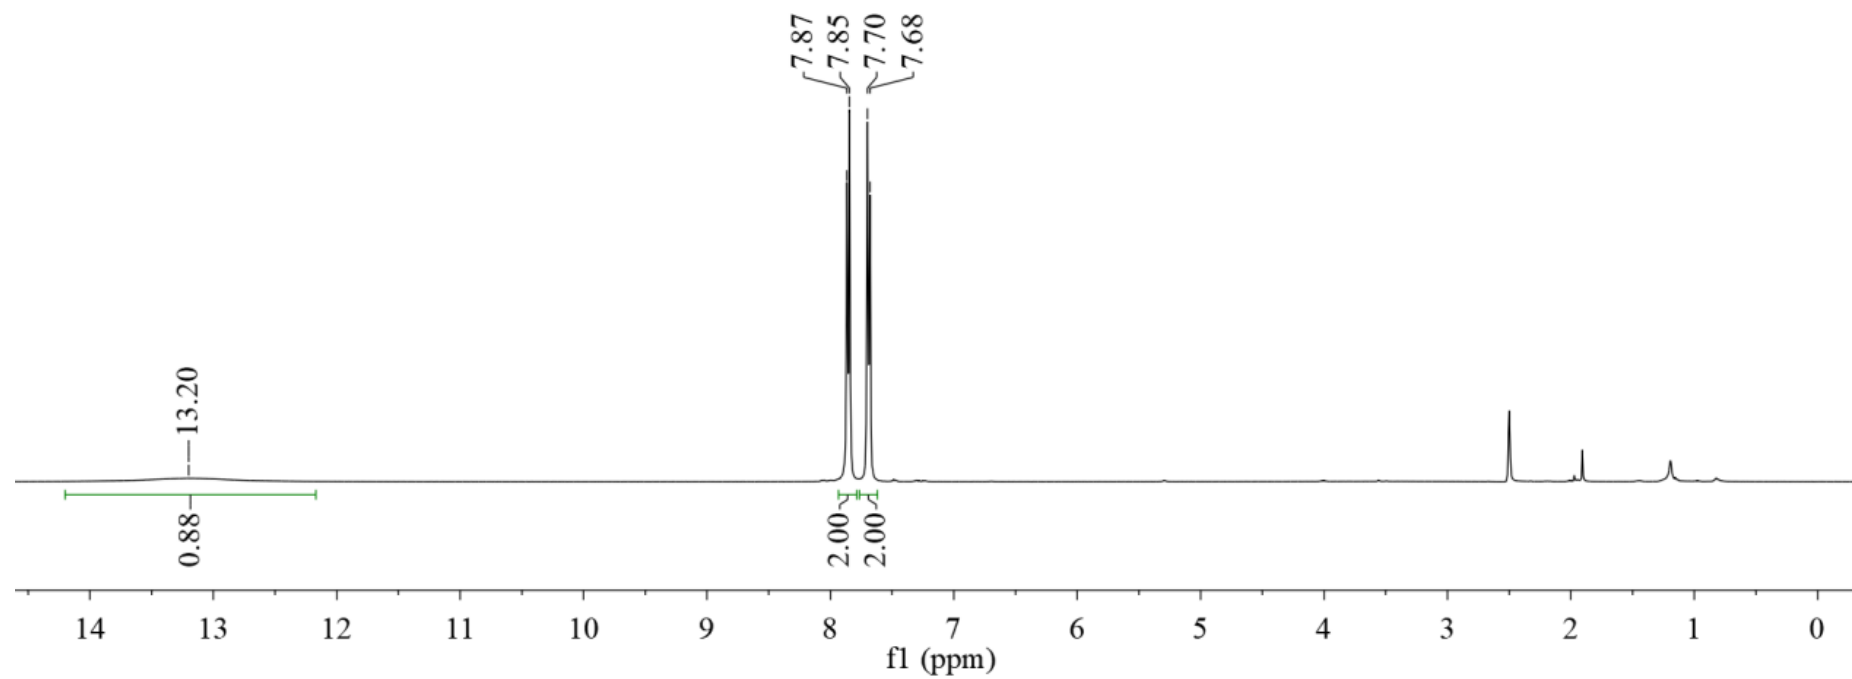

$^{13}\text{C}$  NMR (101 MHz,  $\text{DMSO-}d_6$ ) spectrum of **2j**

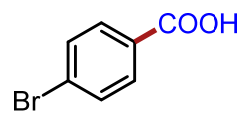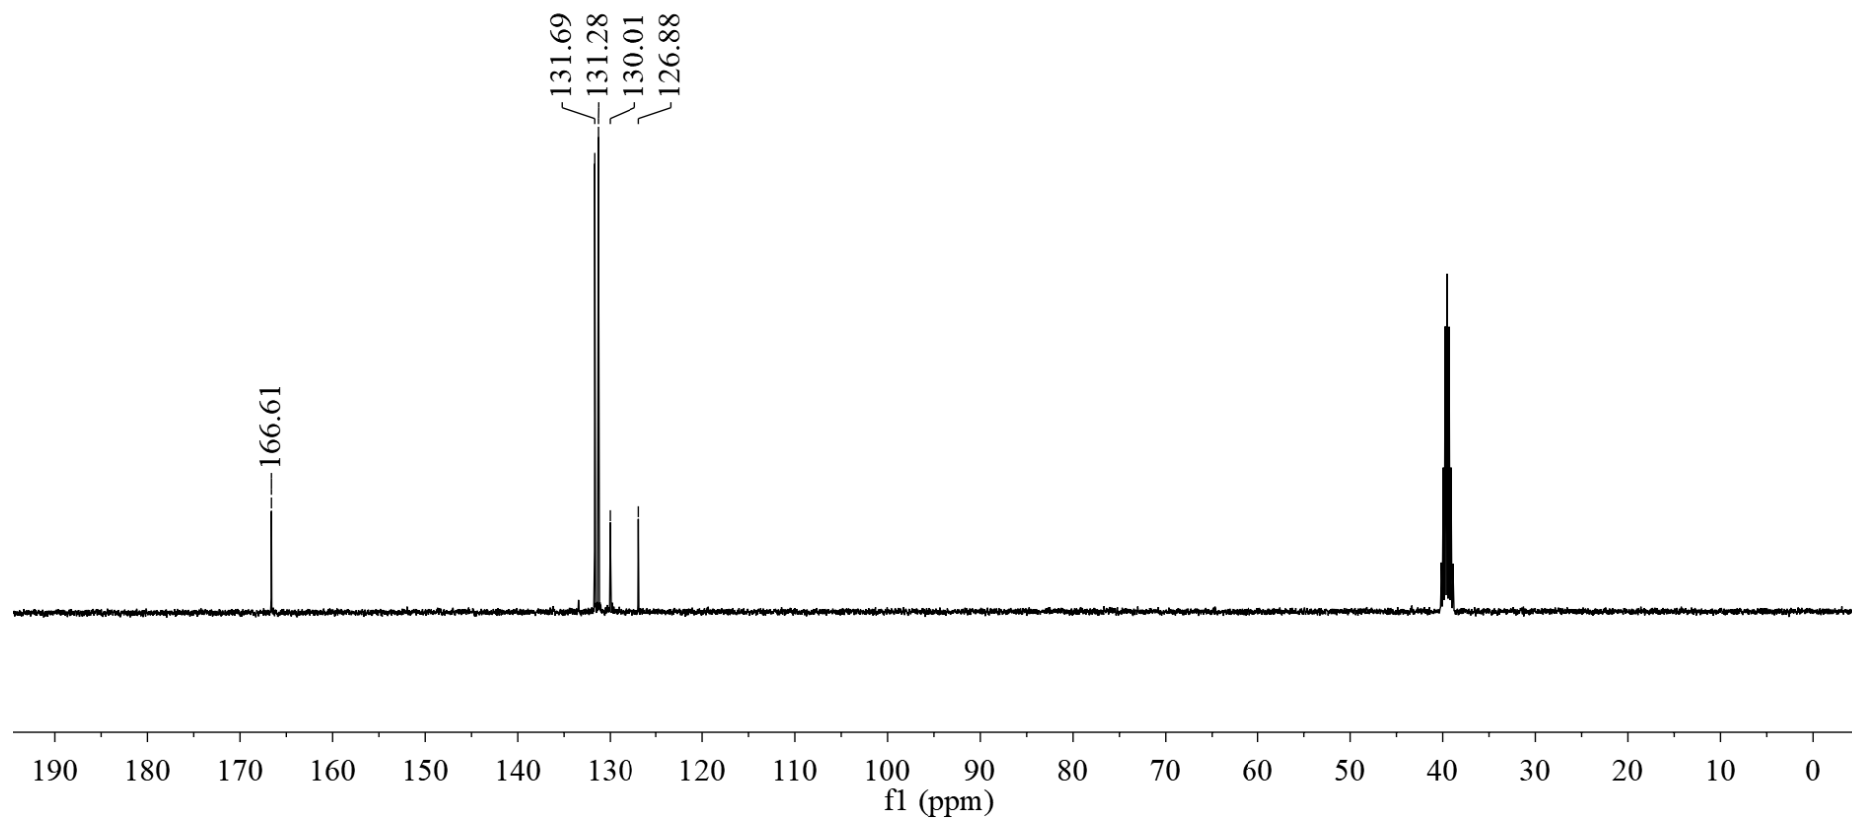

$^1\text{H}$  NMR (400 MHz,  $\text{DMSO-}d_6$ ) spectrum of **2k**

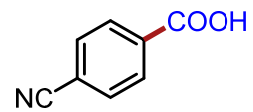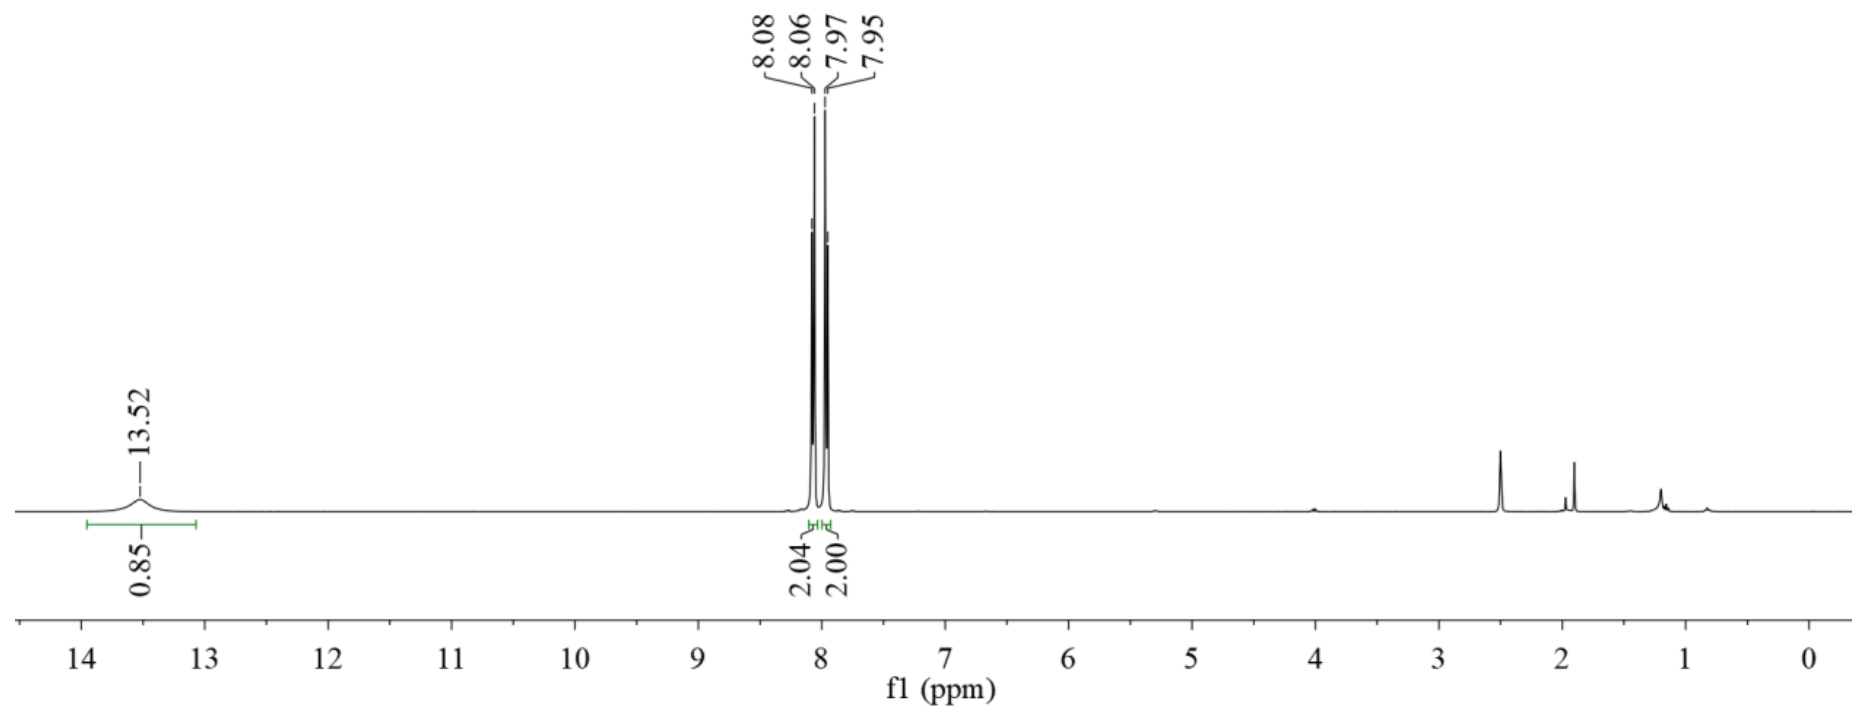

$^{13}\text{C}$  NMR (101 MHz,  $\text{DMSO-}d_6$ ) spectrum of **2k**

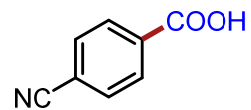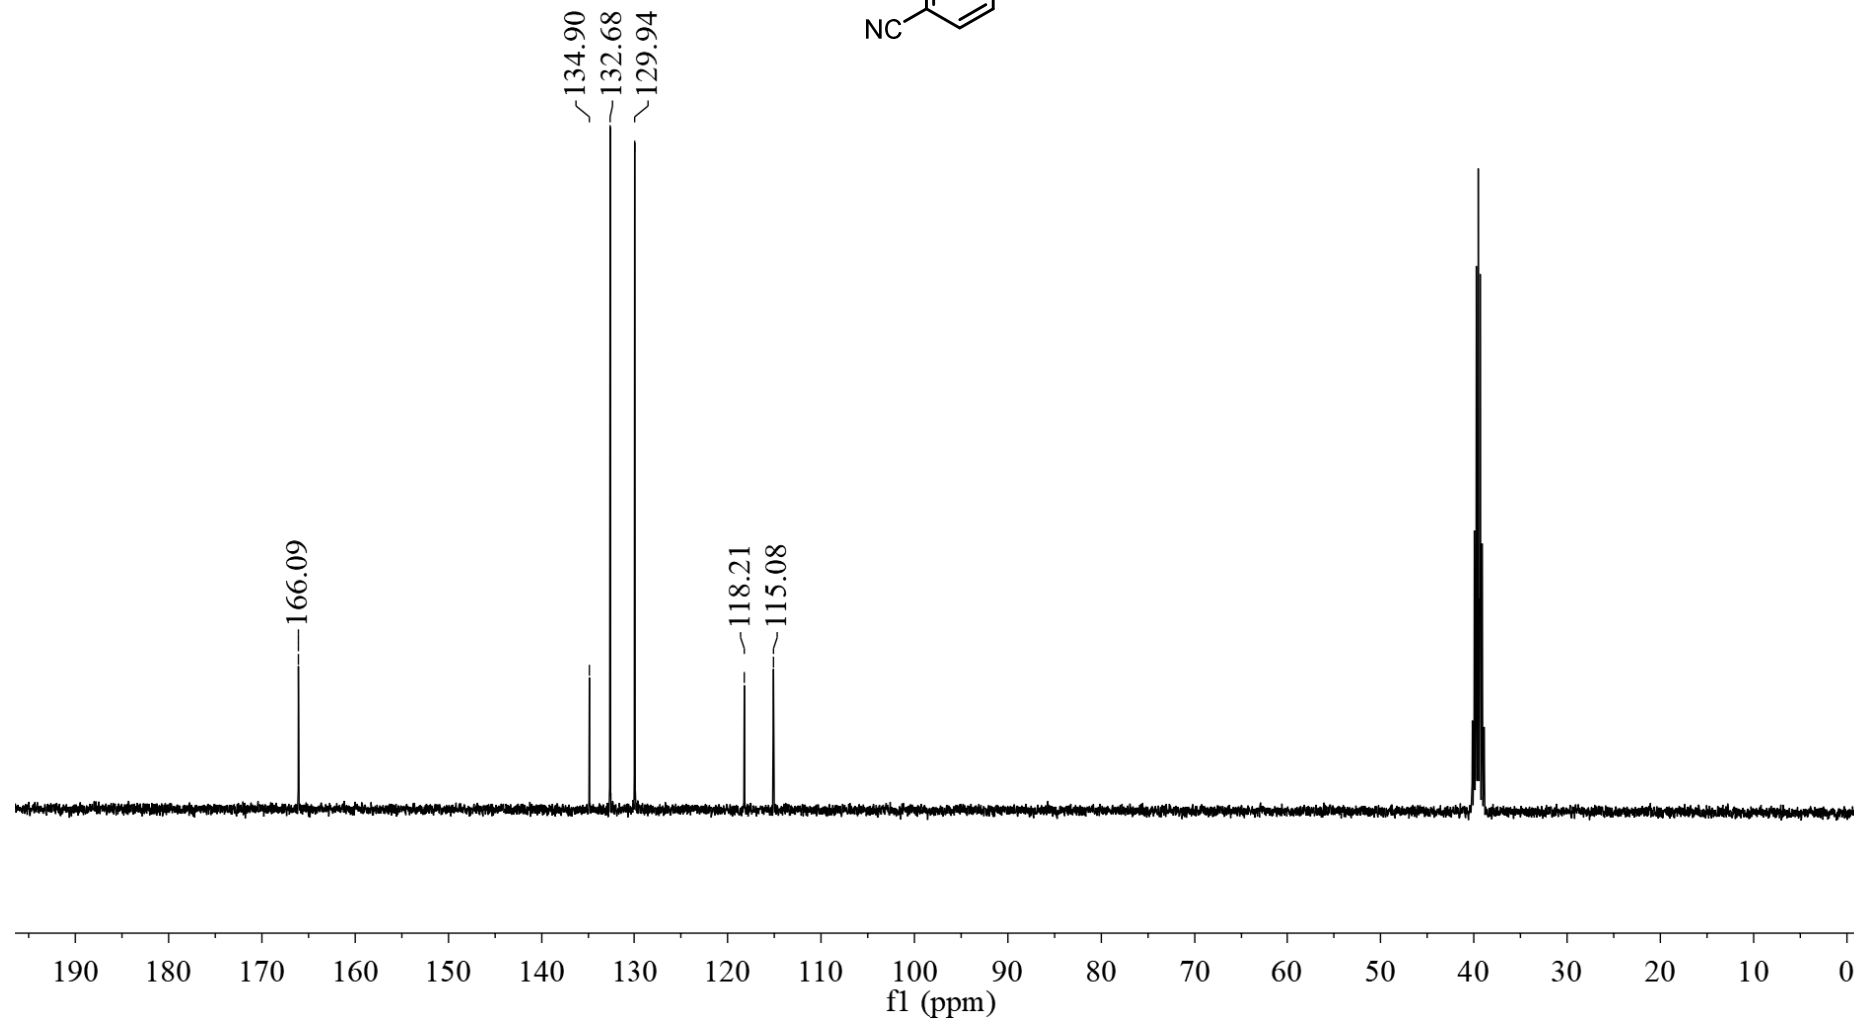

$^1\text{H}$  NMR (400 MHz,  $\text{DMSO-}d_6$ ) spectrum of **21**

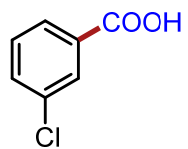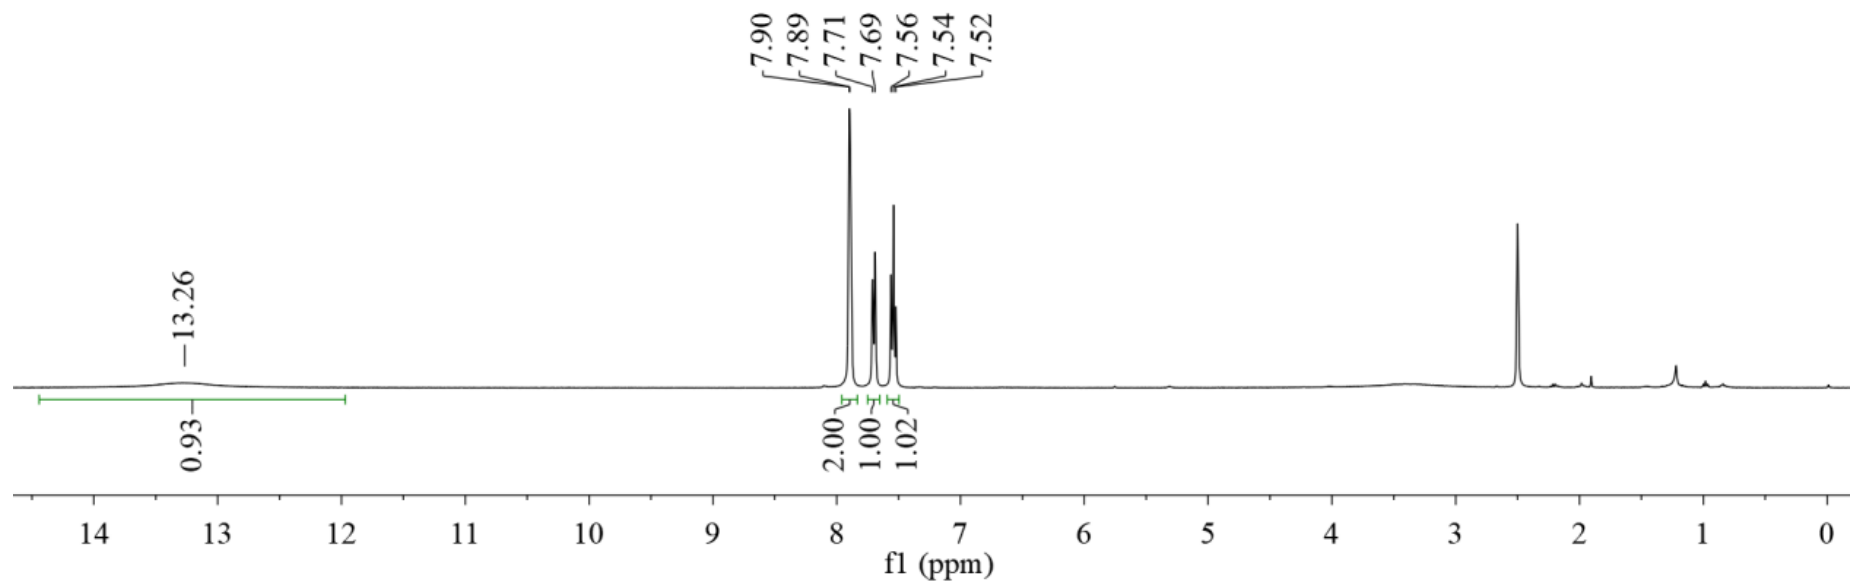

$^{13}\text{C}$  NMR (101 MHz,  $\text{DMSO-}d_6$ ) spectrum of **21**

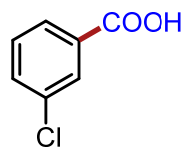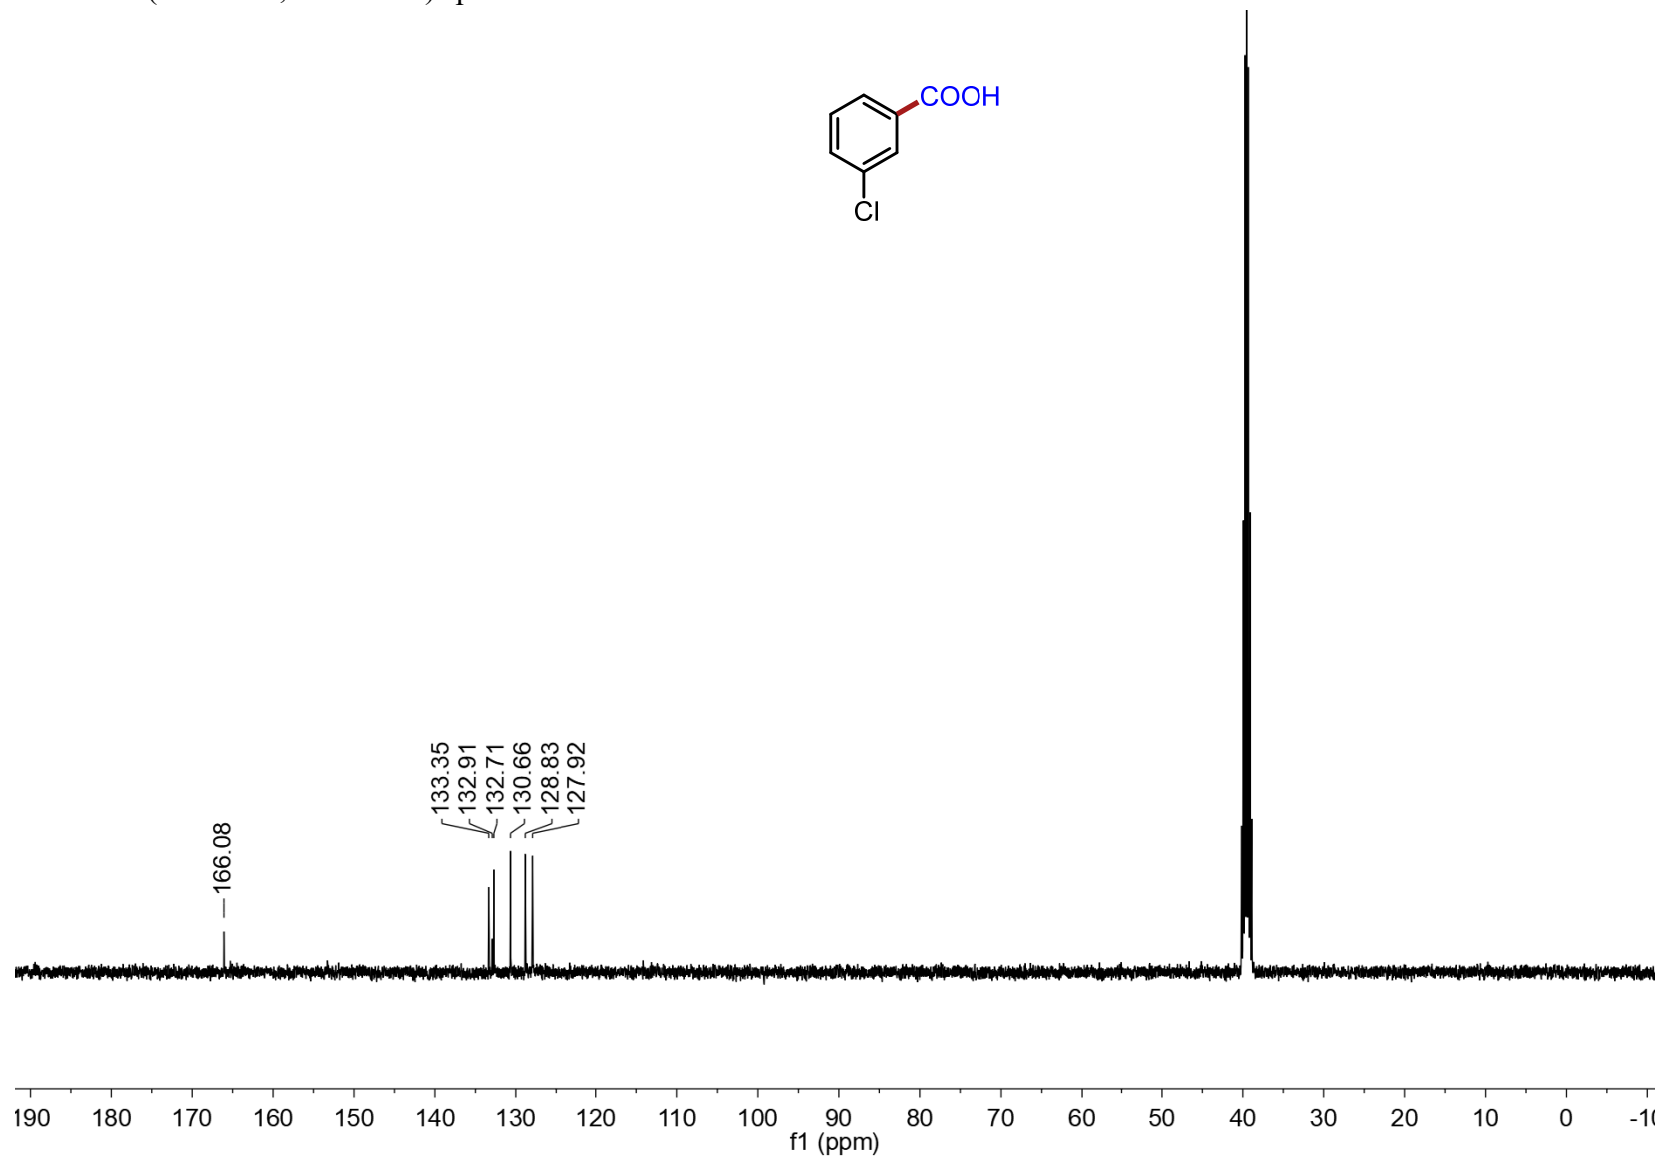

$^1\text{H}$  NMR (400 MHz,  $\text{DMSO-}d_6$ ) spectrum of **2m**

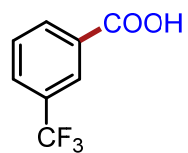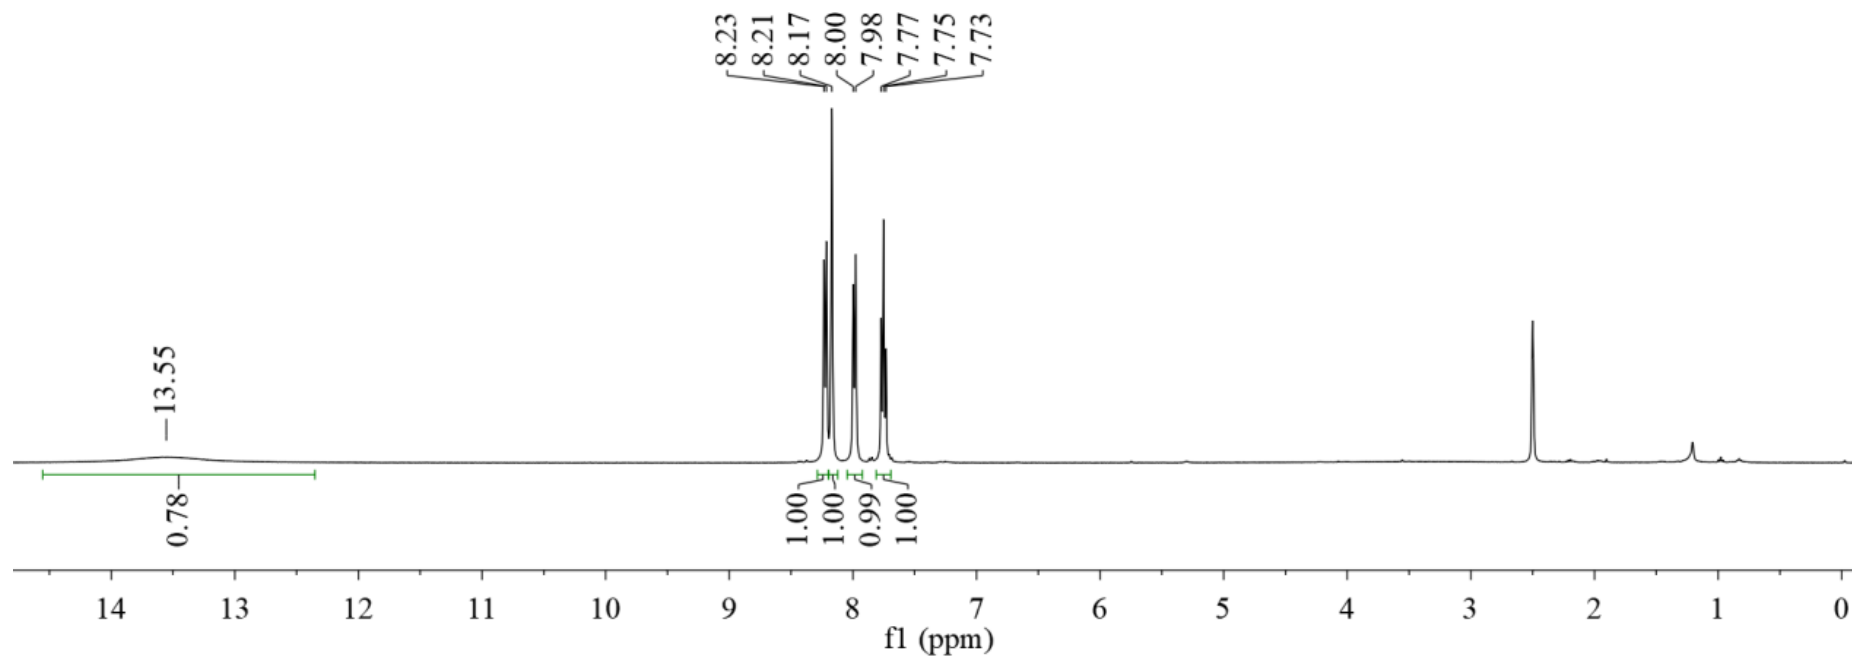

$^{13}\text{C}$  NMR (101 MHz,  $\text{DMSO-}d_6$ ) spectrum of **2m**

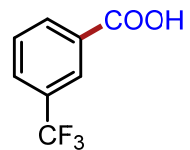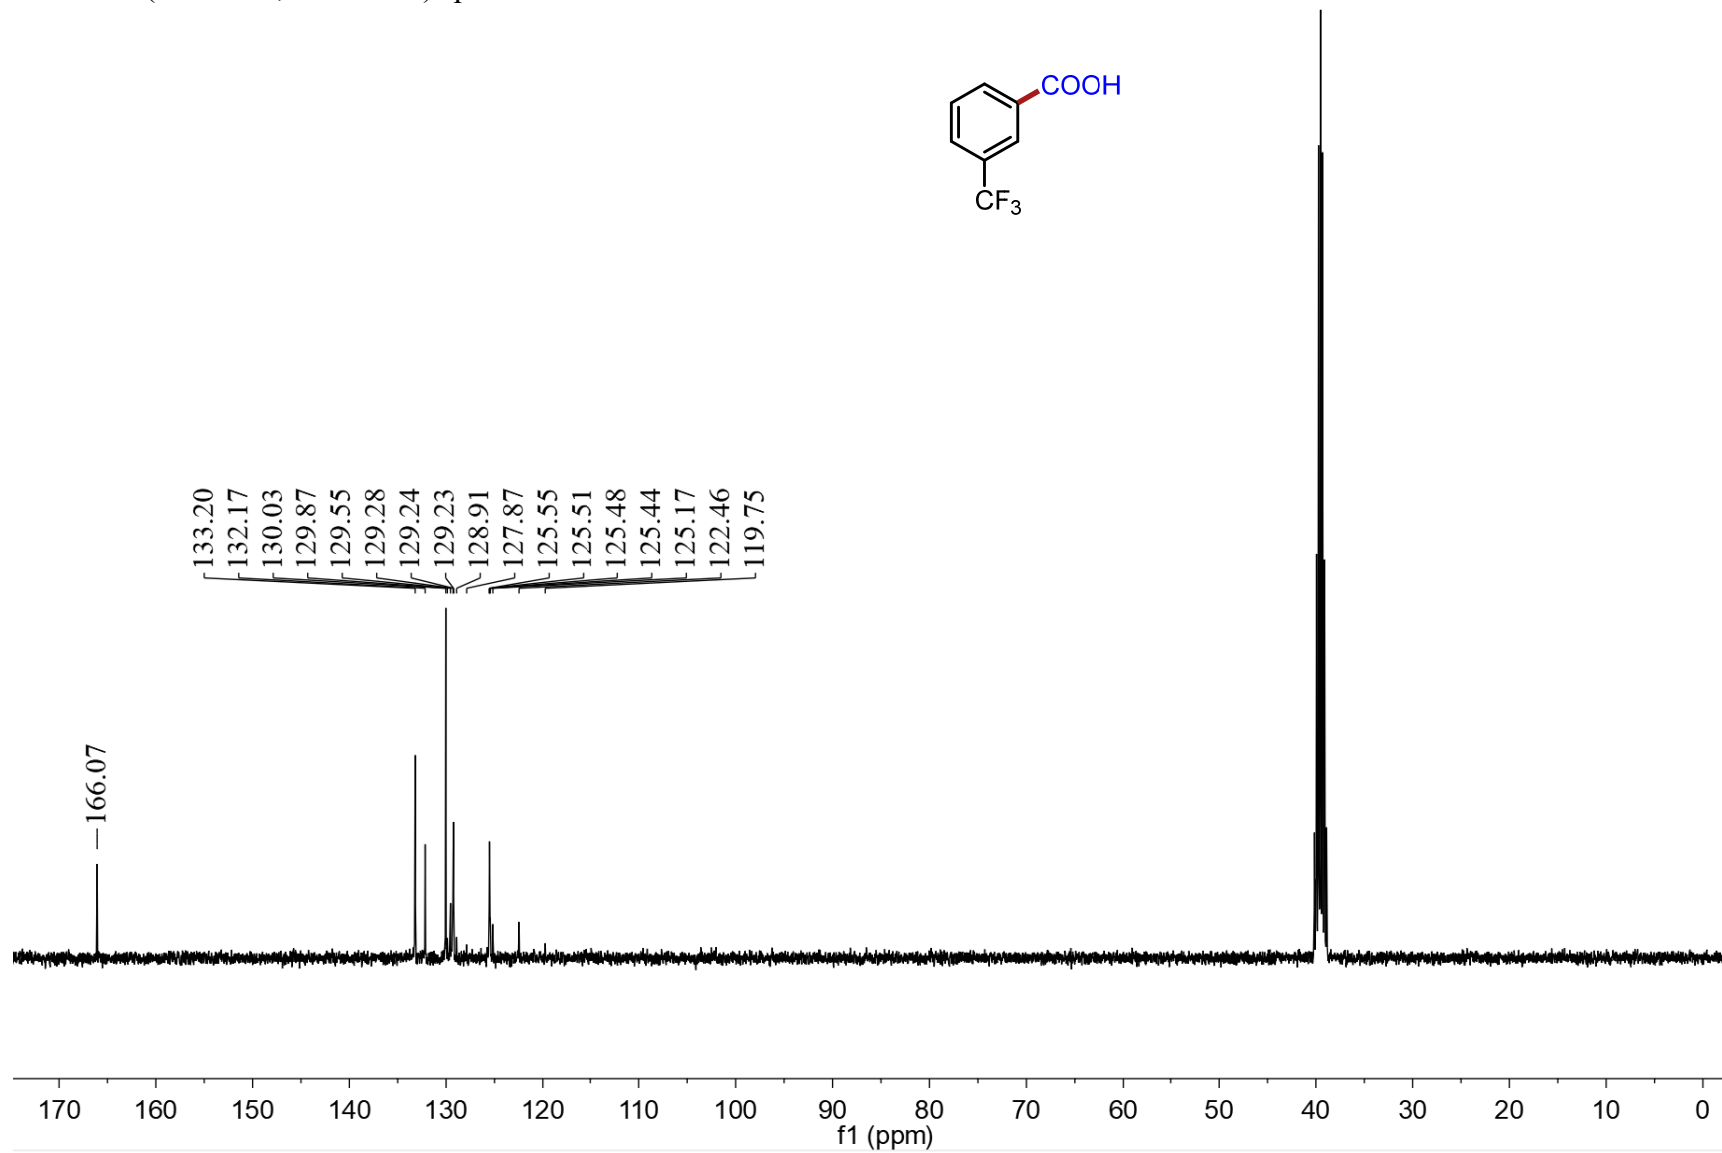



$^{19}\text{F}$  NMR (376 MHz,  $\text{DMSO-}d_6$ ) spectrum of **2m**

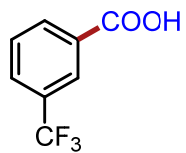

-61.43

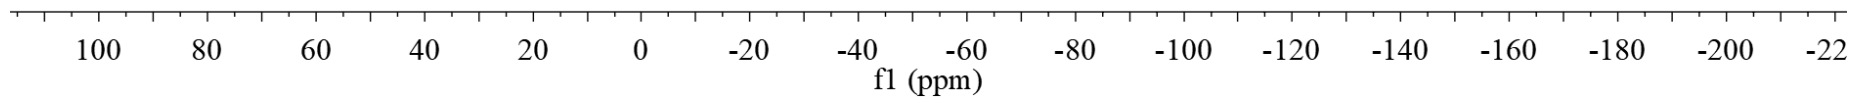

$^1\text{H}$  NMR (400 MHz,  $\text{DMSO-}d_6$ ) spectrum of **2n**

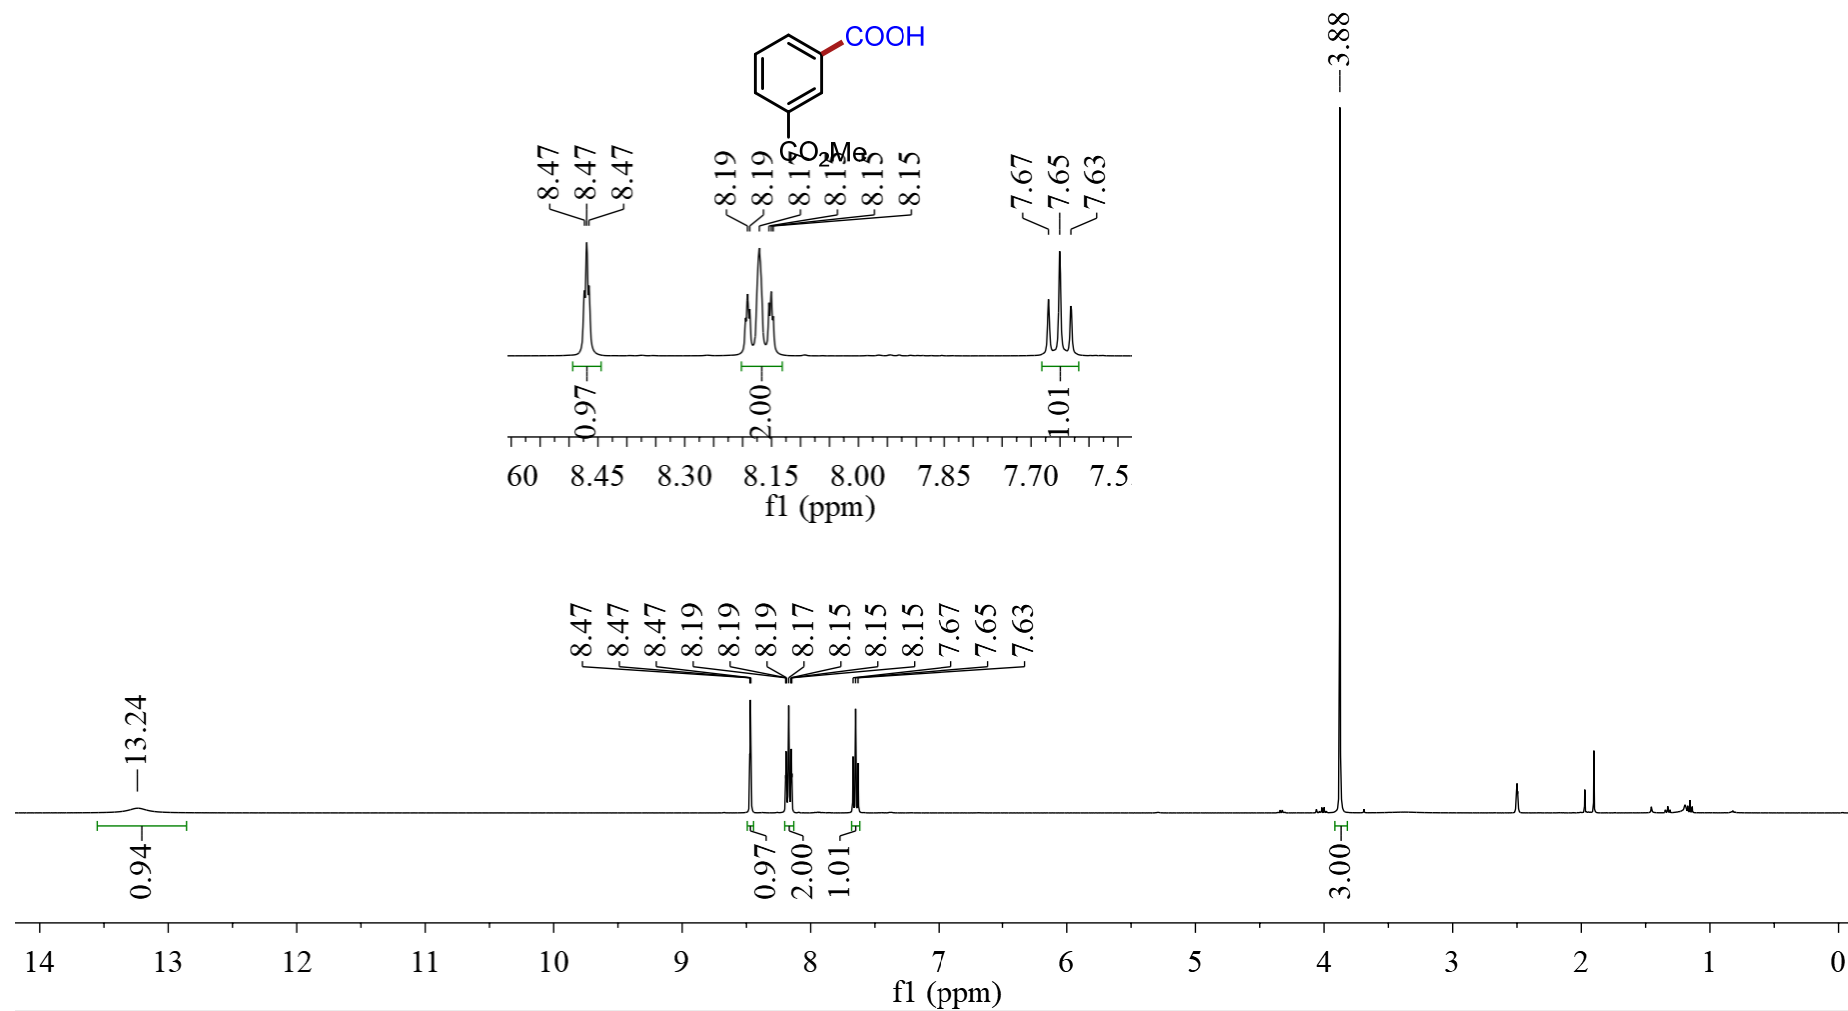

$^{13}\text{C}$  NMR (101 MHz,  $\text{DMSO-}d_6$ ) spectrum of **2n**

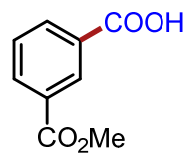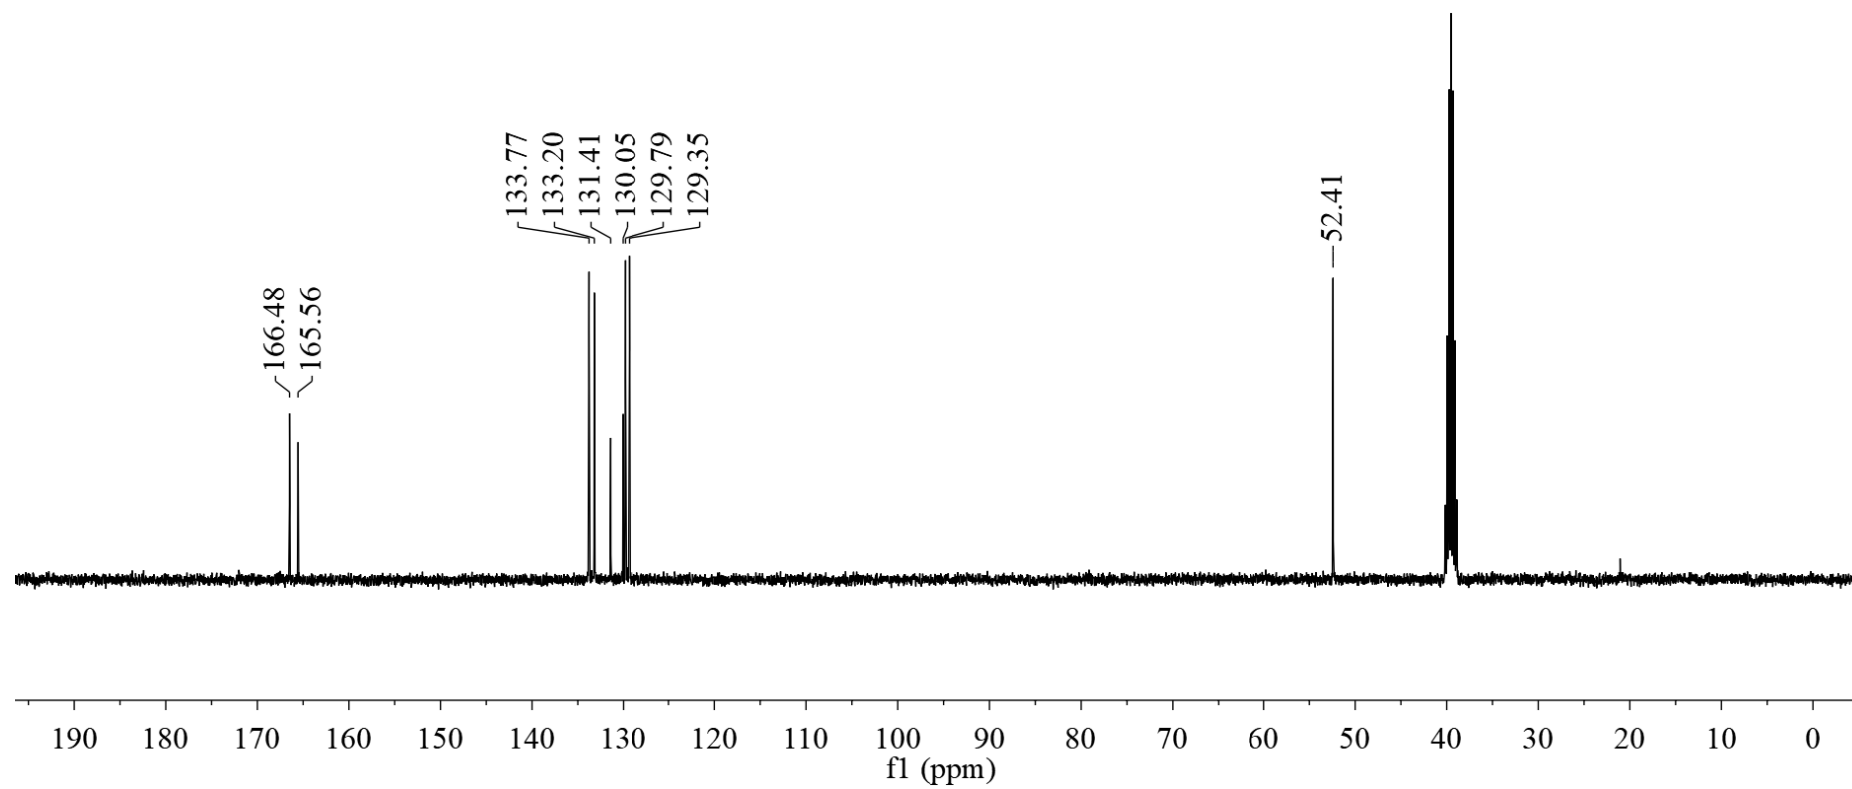

$^1\text{H}$  NMR (400 MHz,  $\text{DMSO-}d_6$ ) spectrum of **2o**

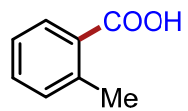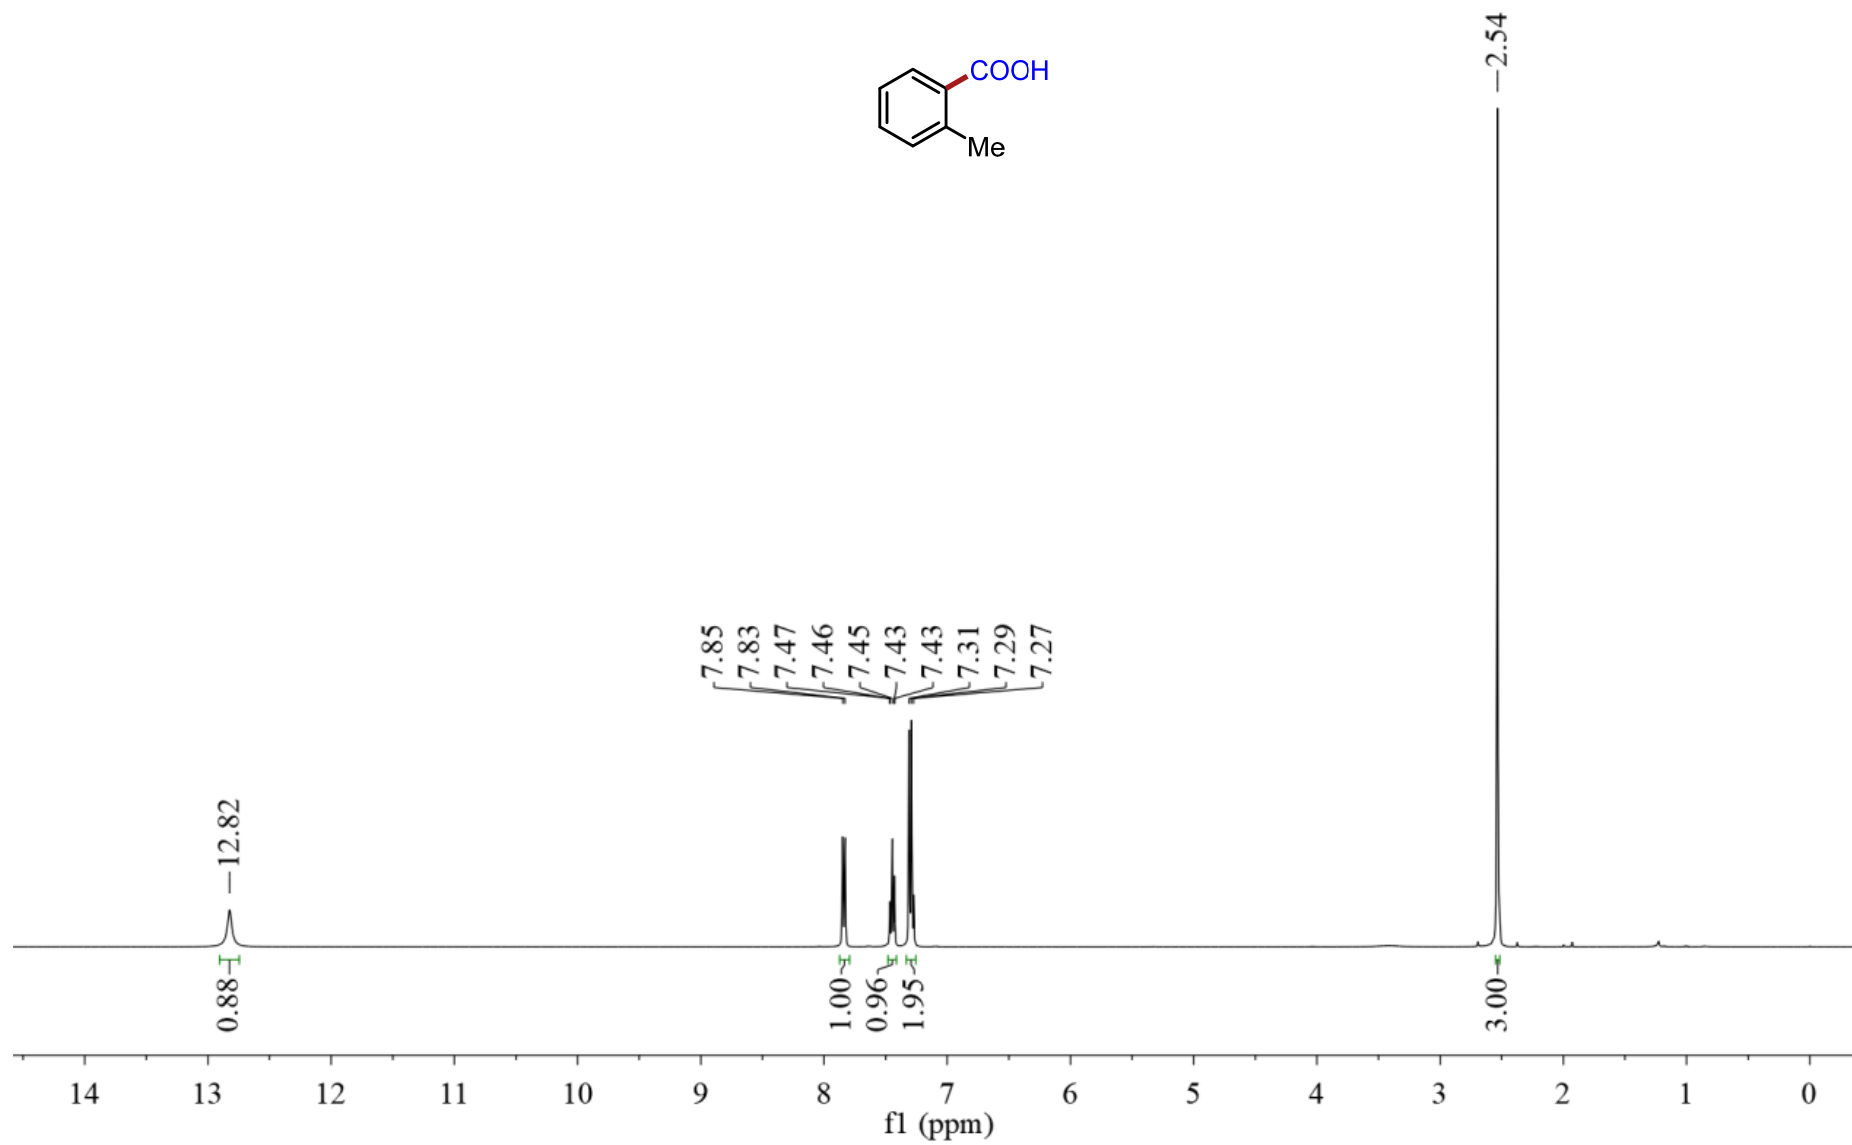

$^{13}\text{C}$  NMR (101 MHz,  $\text{DMSO-}d_6$ ) spectrum of **2o**

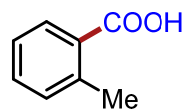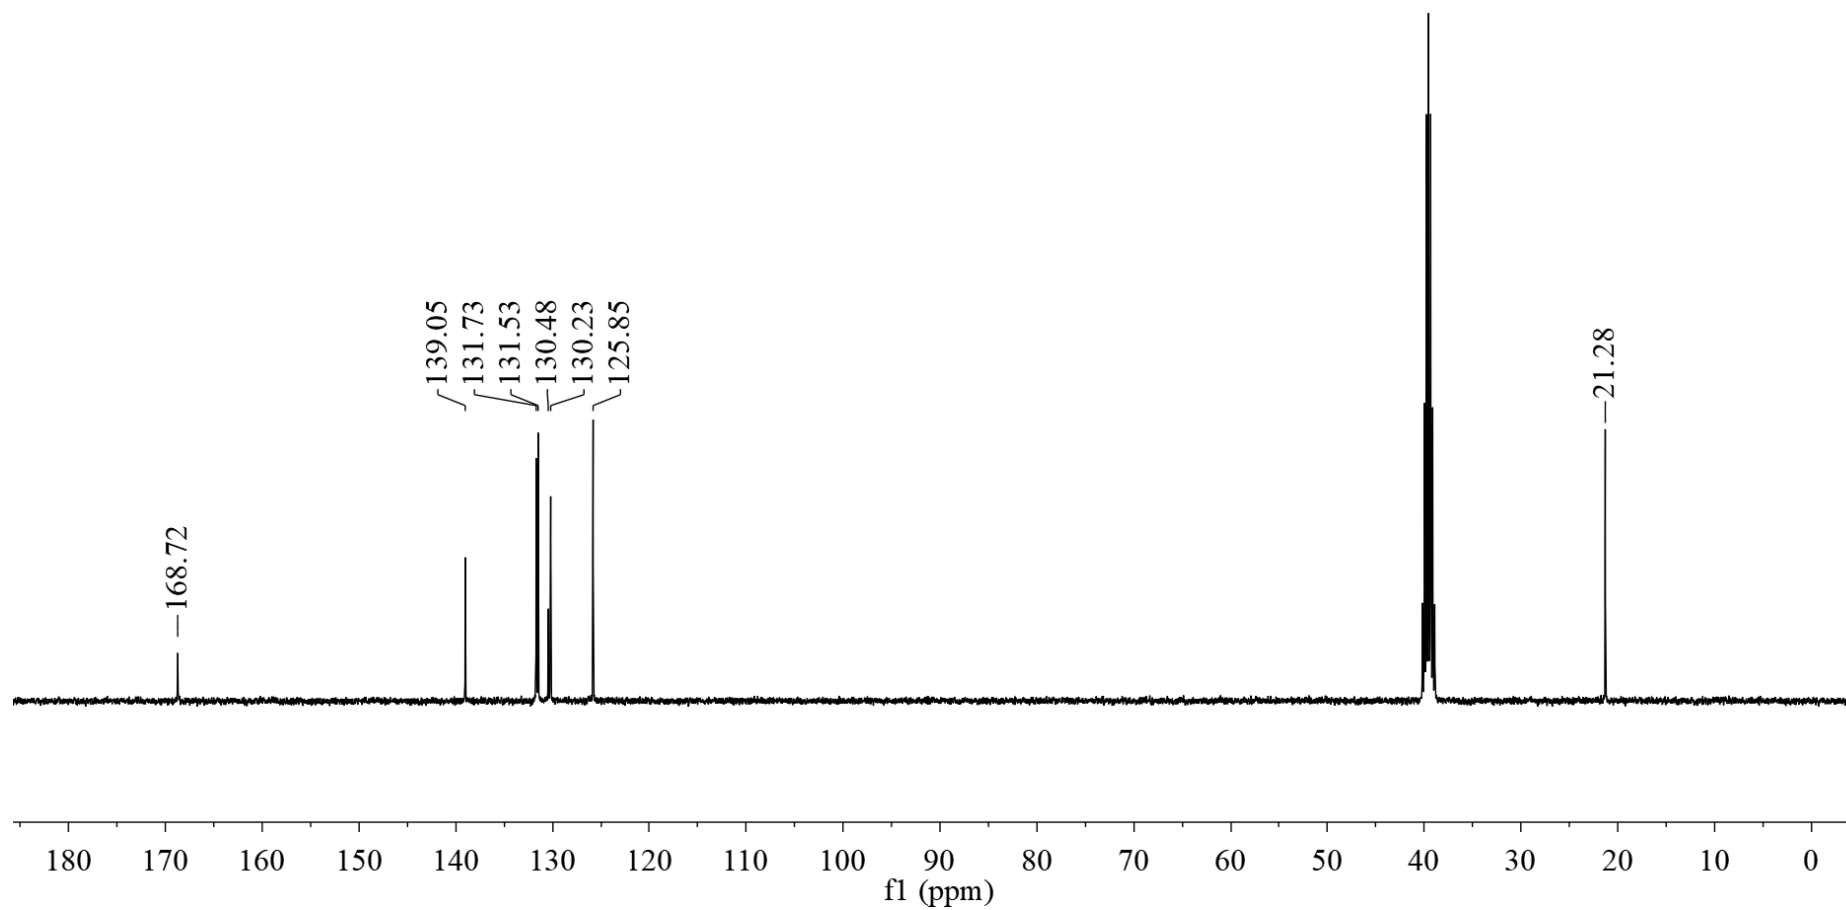

$^1\text{H}$  NMR (400 MHz,  $\text{DMSO-}d_6$ ) spectrum of **2p**

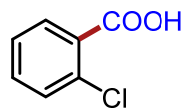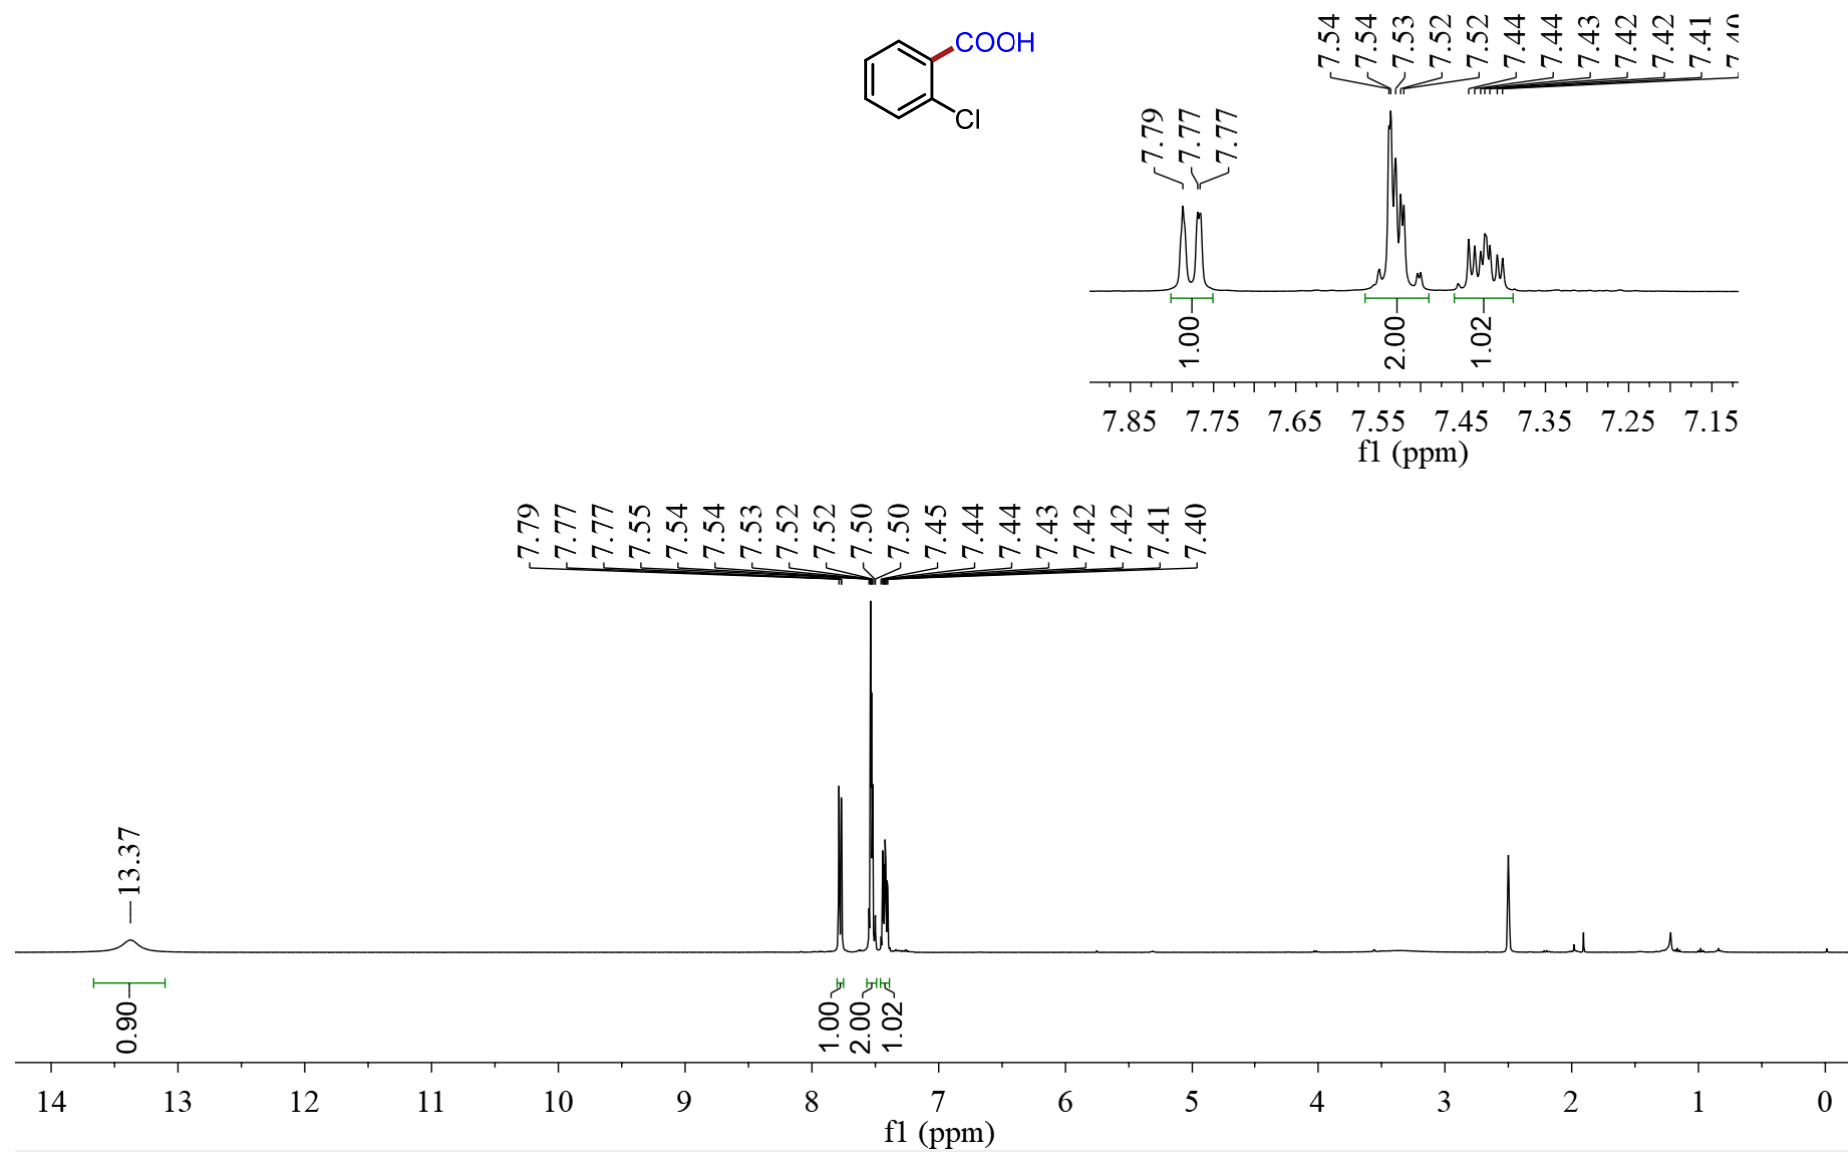

$^{13}\text{C}$  NMR (101 MHz,  $\text{DMSO-}d_6$ ) spectrum of **2p**

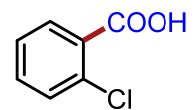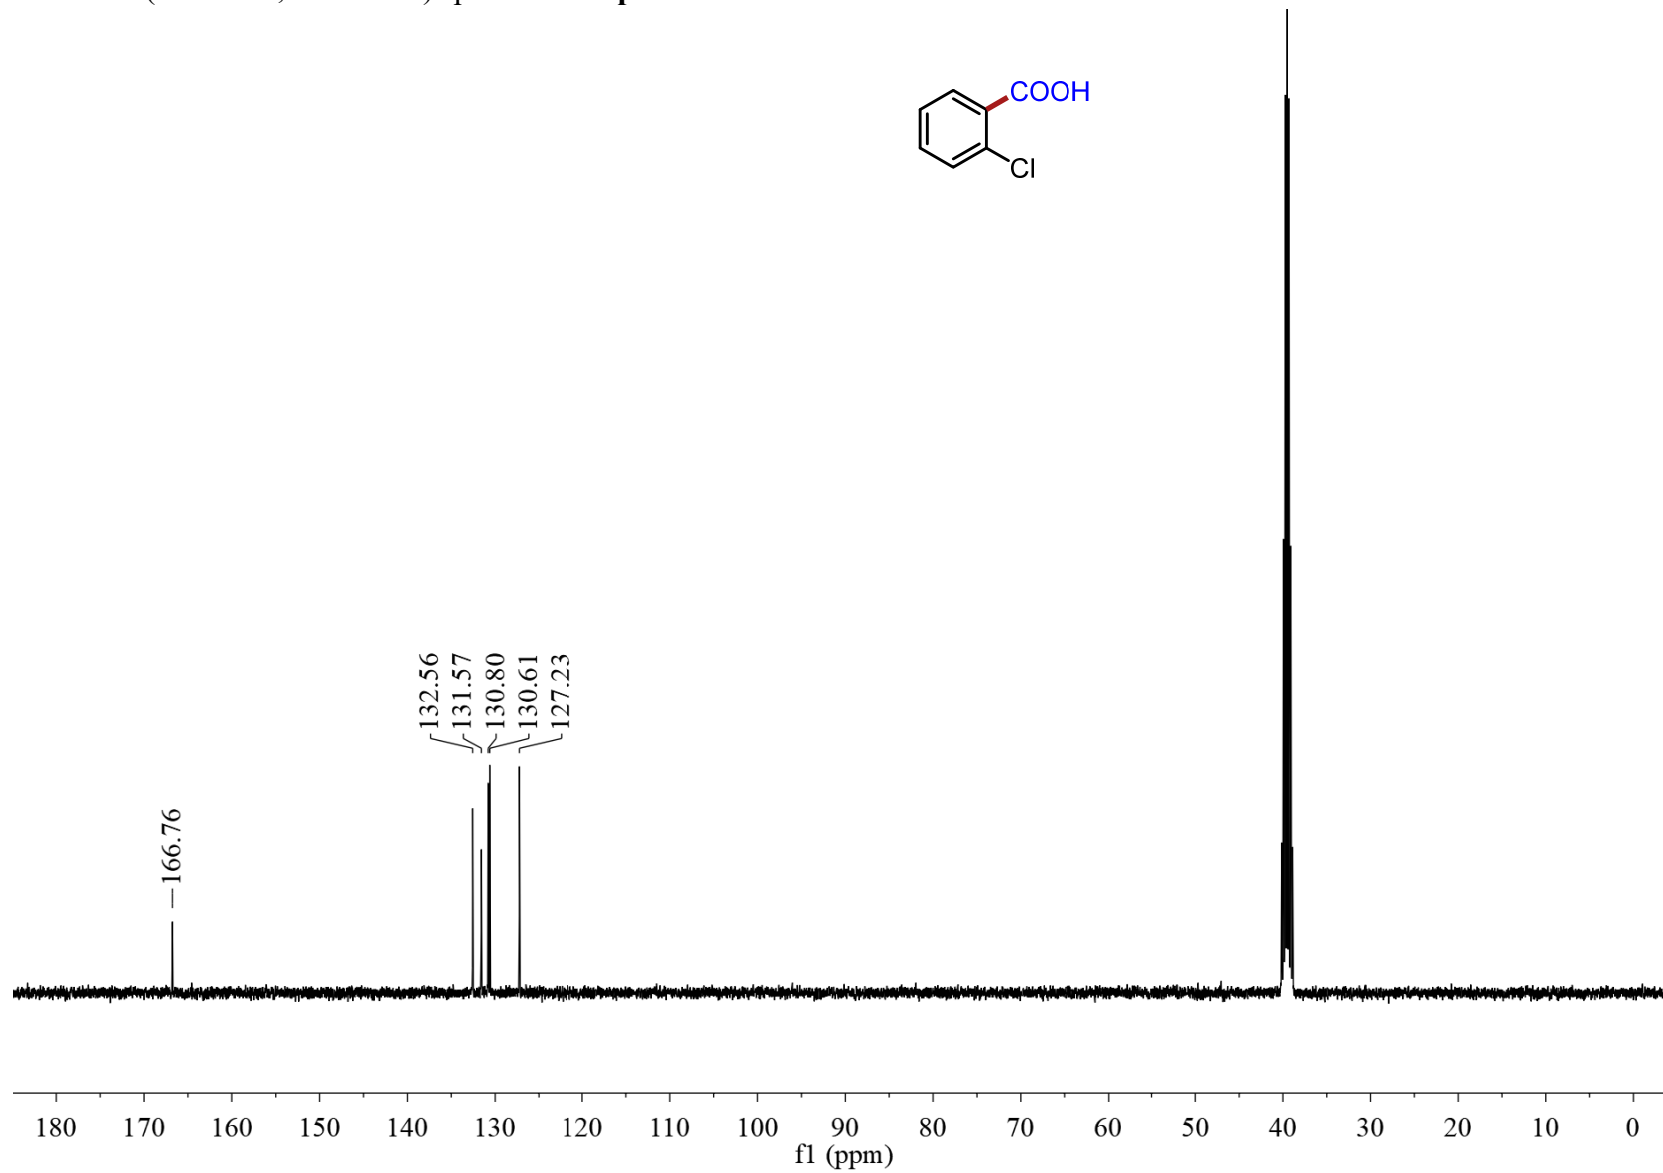

$^1\text{H}$  NMR (400 MHz,  $\text{DMSO-}d_6$ ) spectrum of **2q**

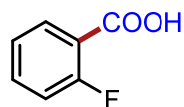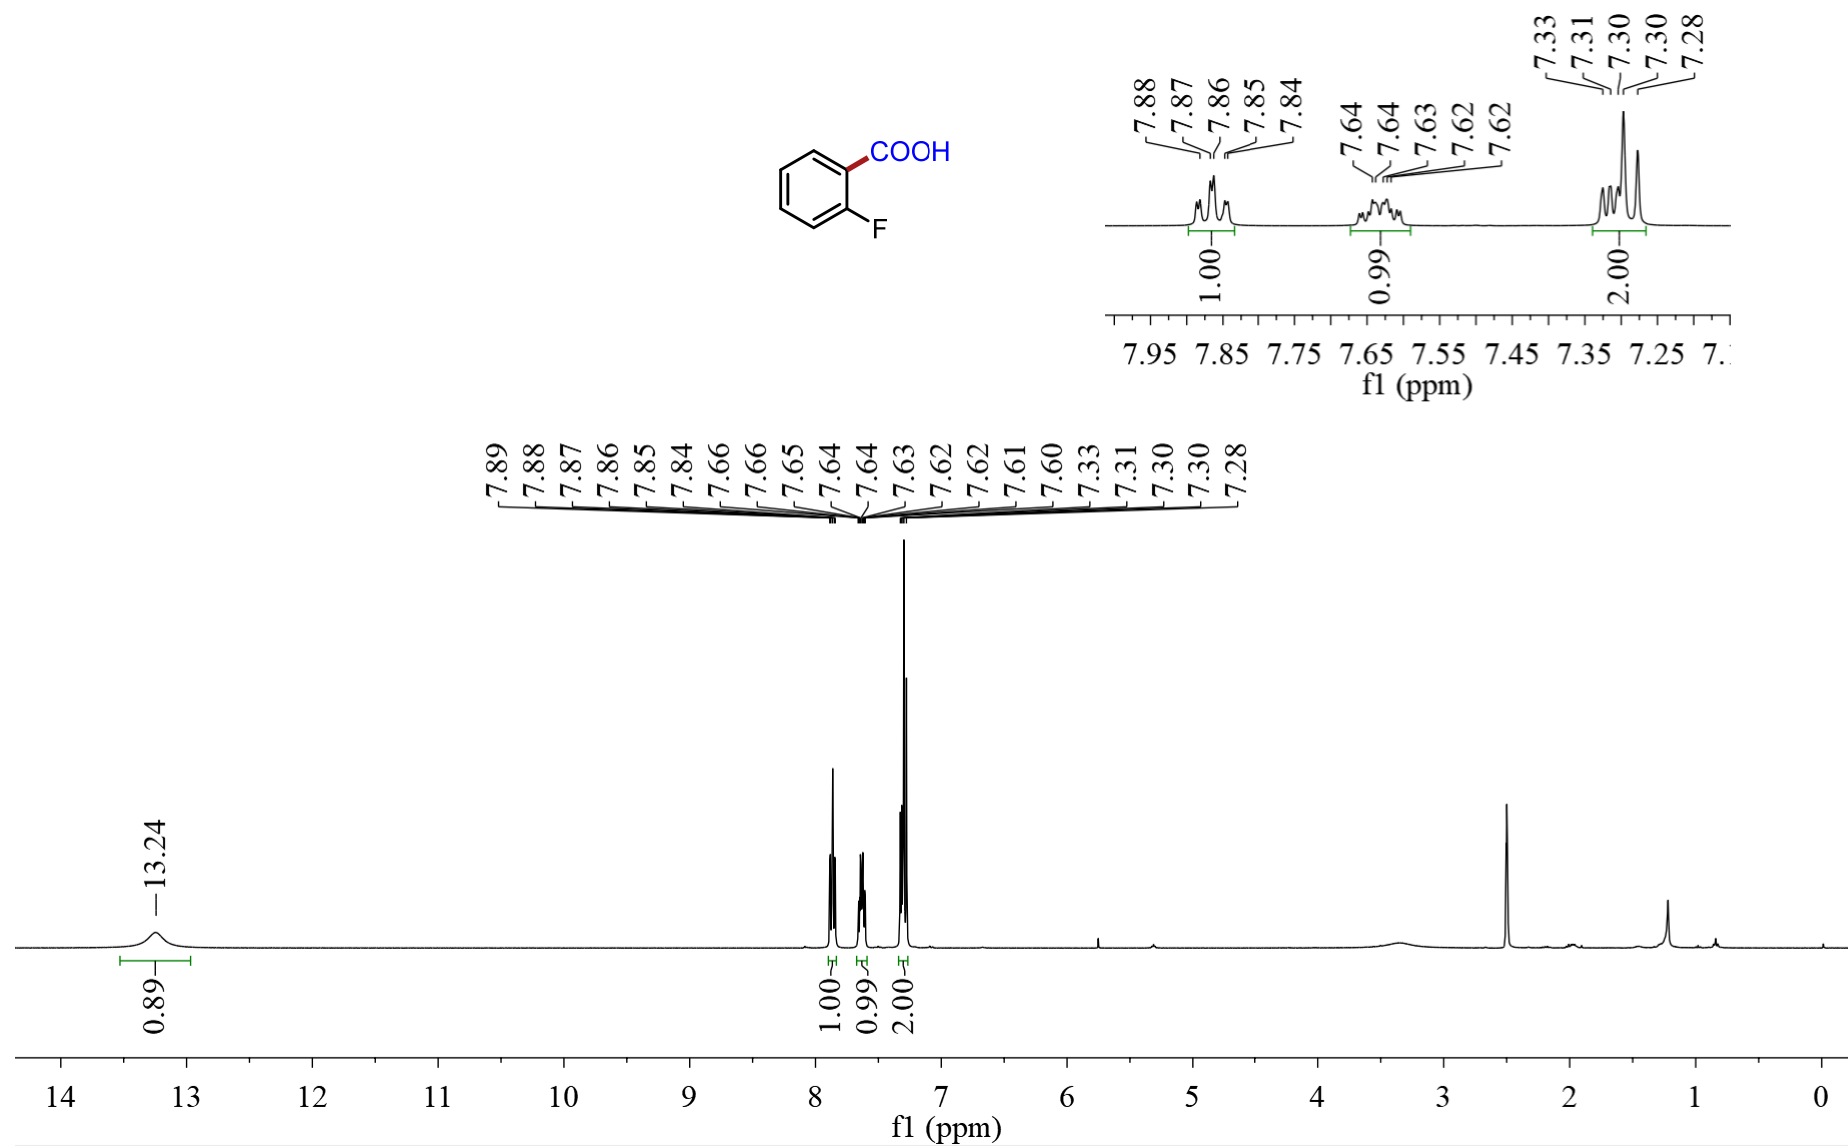



$^{13}\text{C}$  NMR (101 MHz,  $\text{DMSO-}d_6$ ) spectrum of **2q**

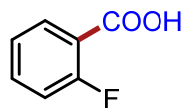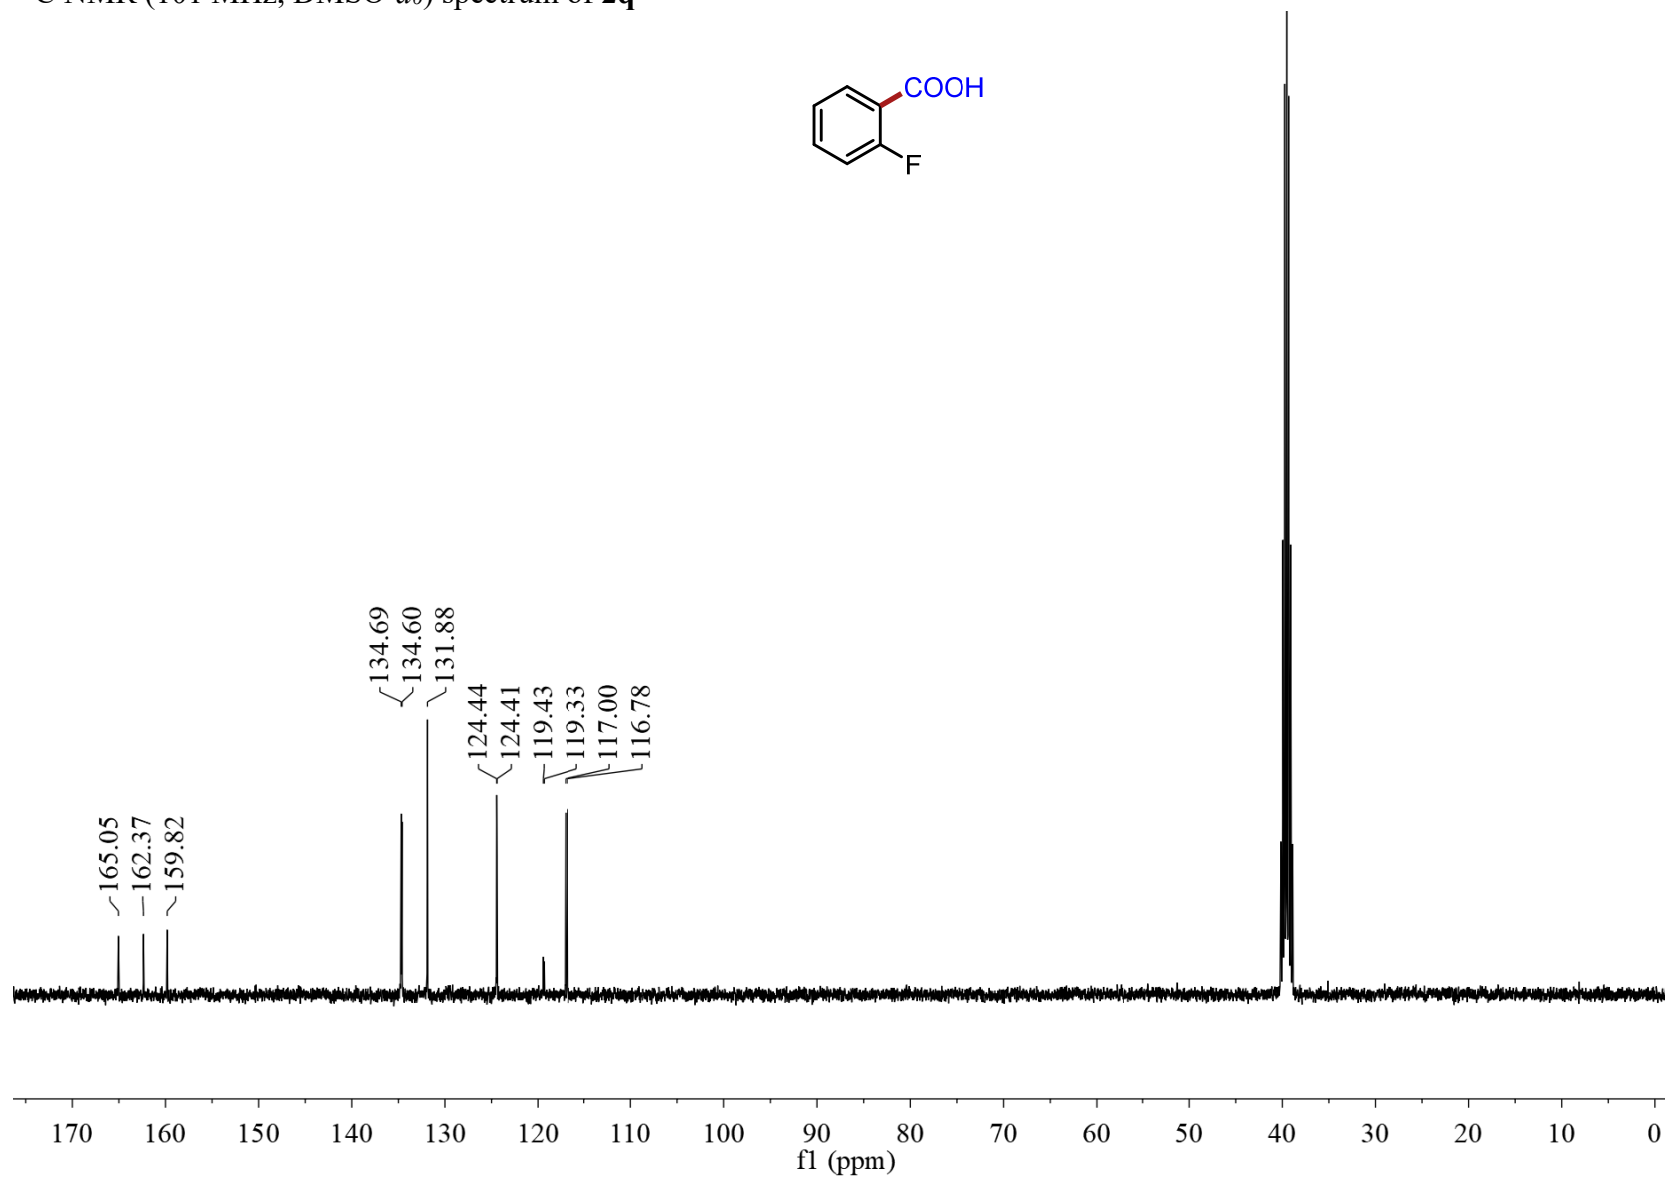

$^{19}\text{F}$  NMR (376 MHz,  $\text{DMSO-}d_6$ ) spectrum of **2q**

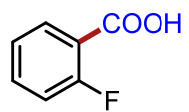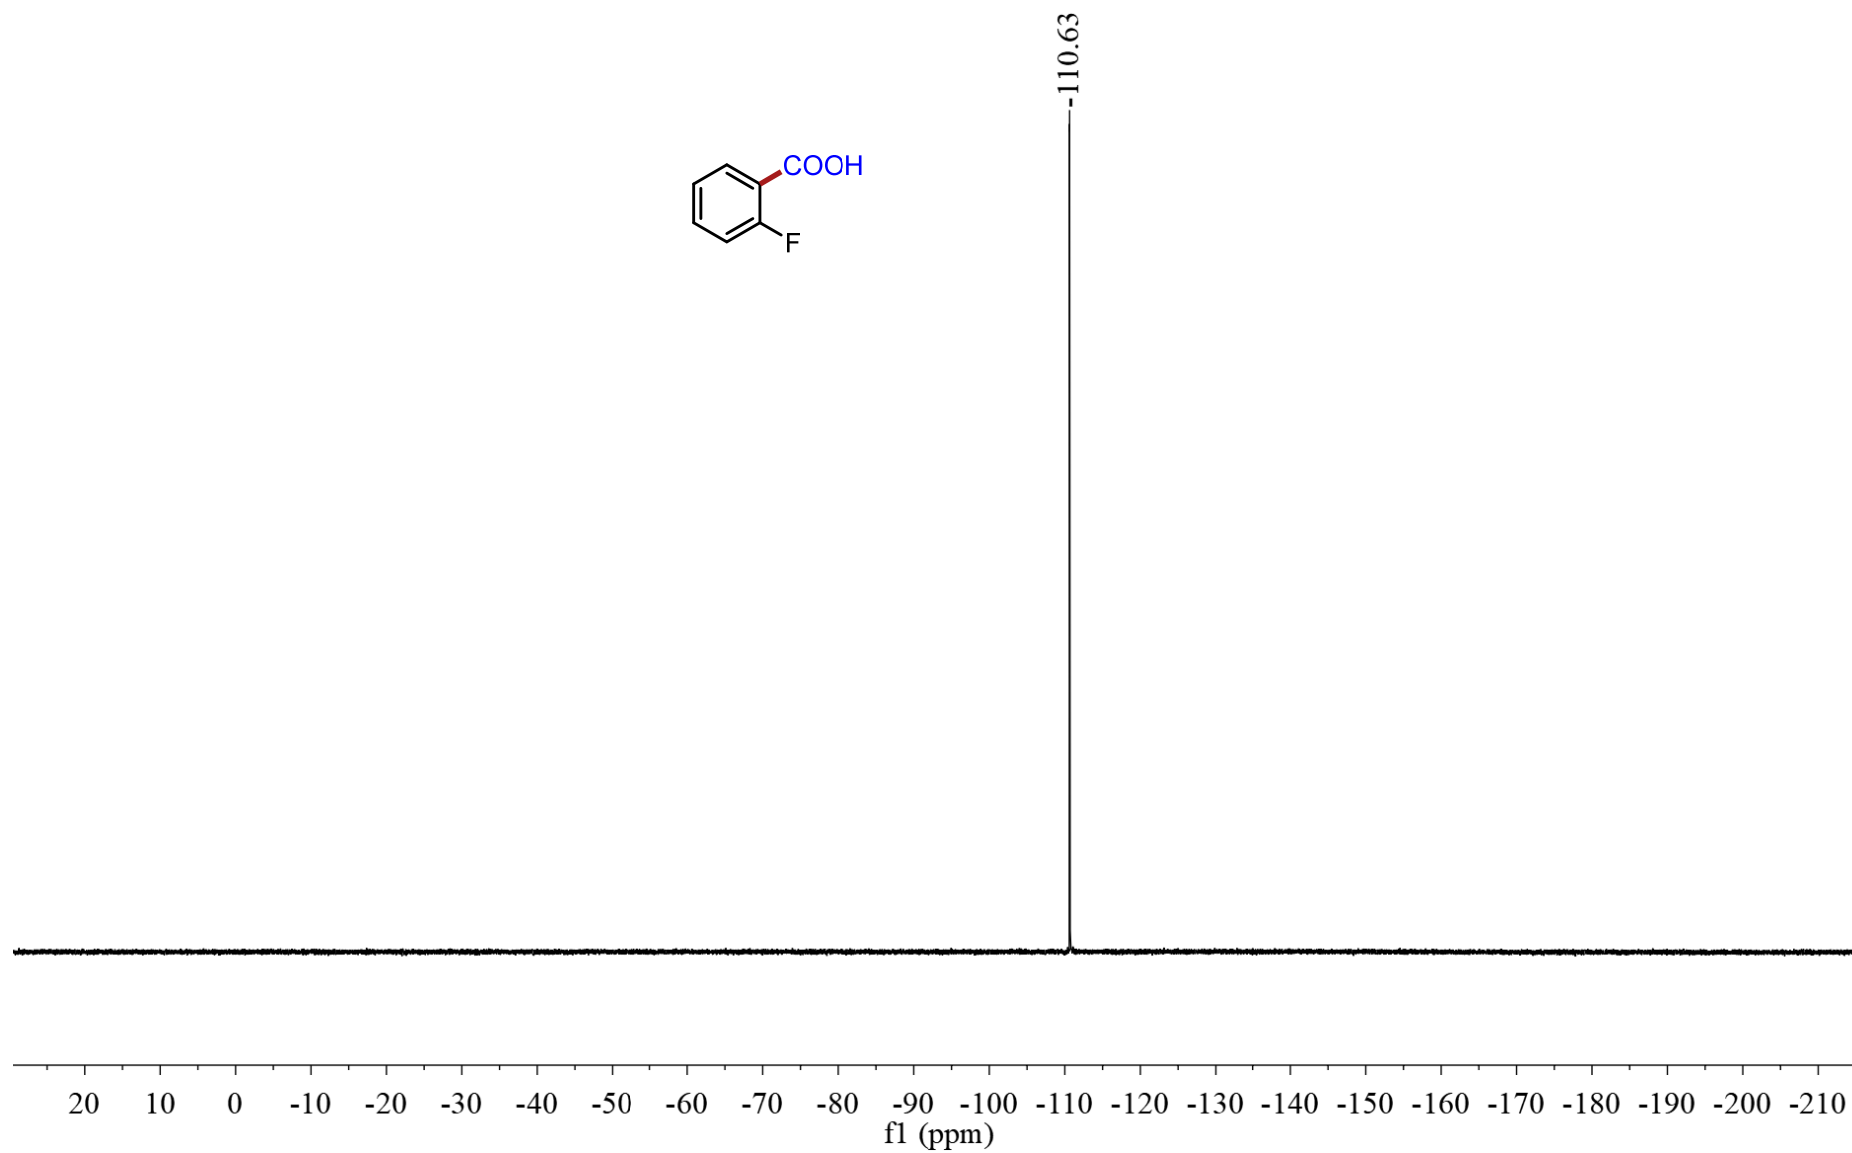

$^1\text{H}$  NMR (400 MHz,  $\text{DMSO-}d_6$ ) spectrum of **2r**

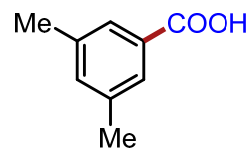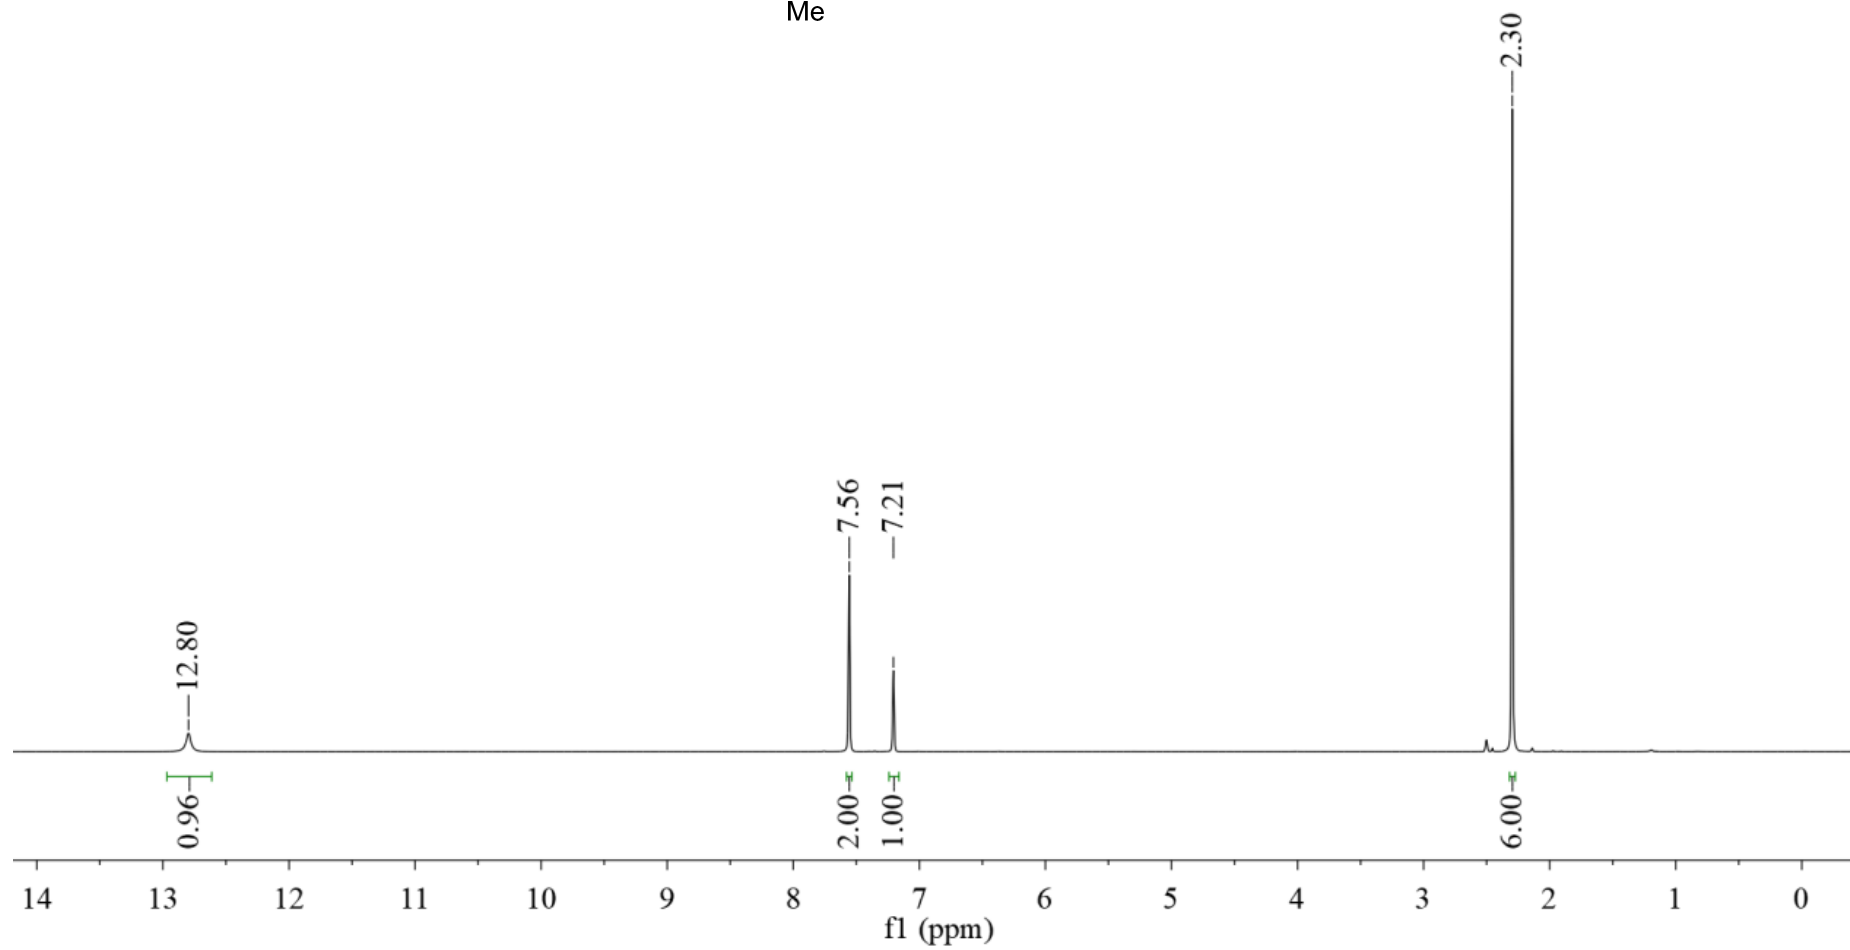

<sup>13</sup>C NMR (101 MHz, DMSO-*d*<sub>6</sub>) spectrum of **2r**

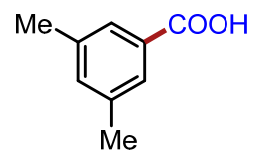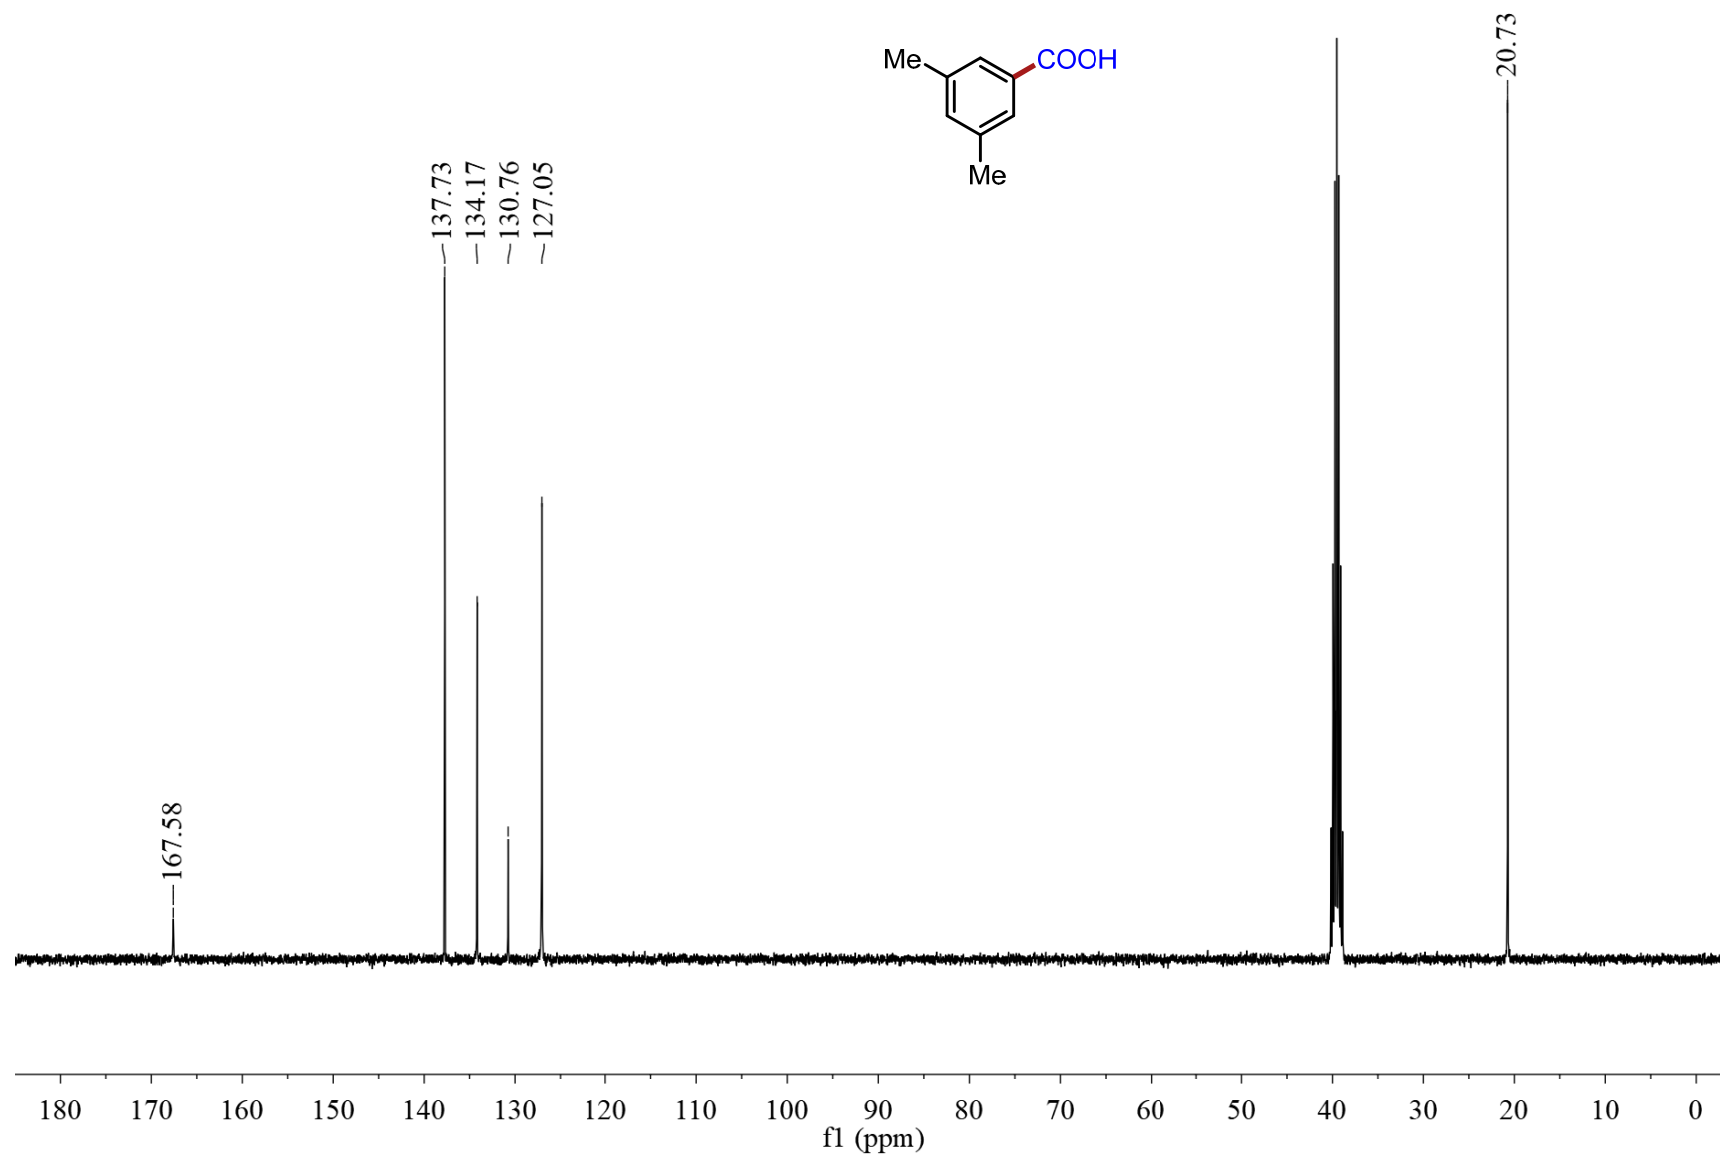

$^1\text{H}$  NMR (400 MHz,  $\text{DMSO-}d_6$ ) spectrum of **2s**

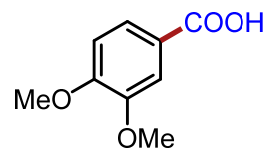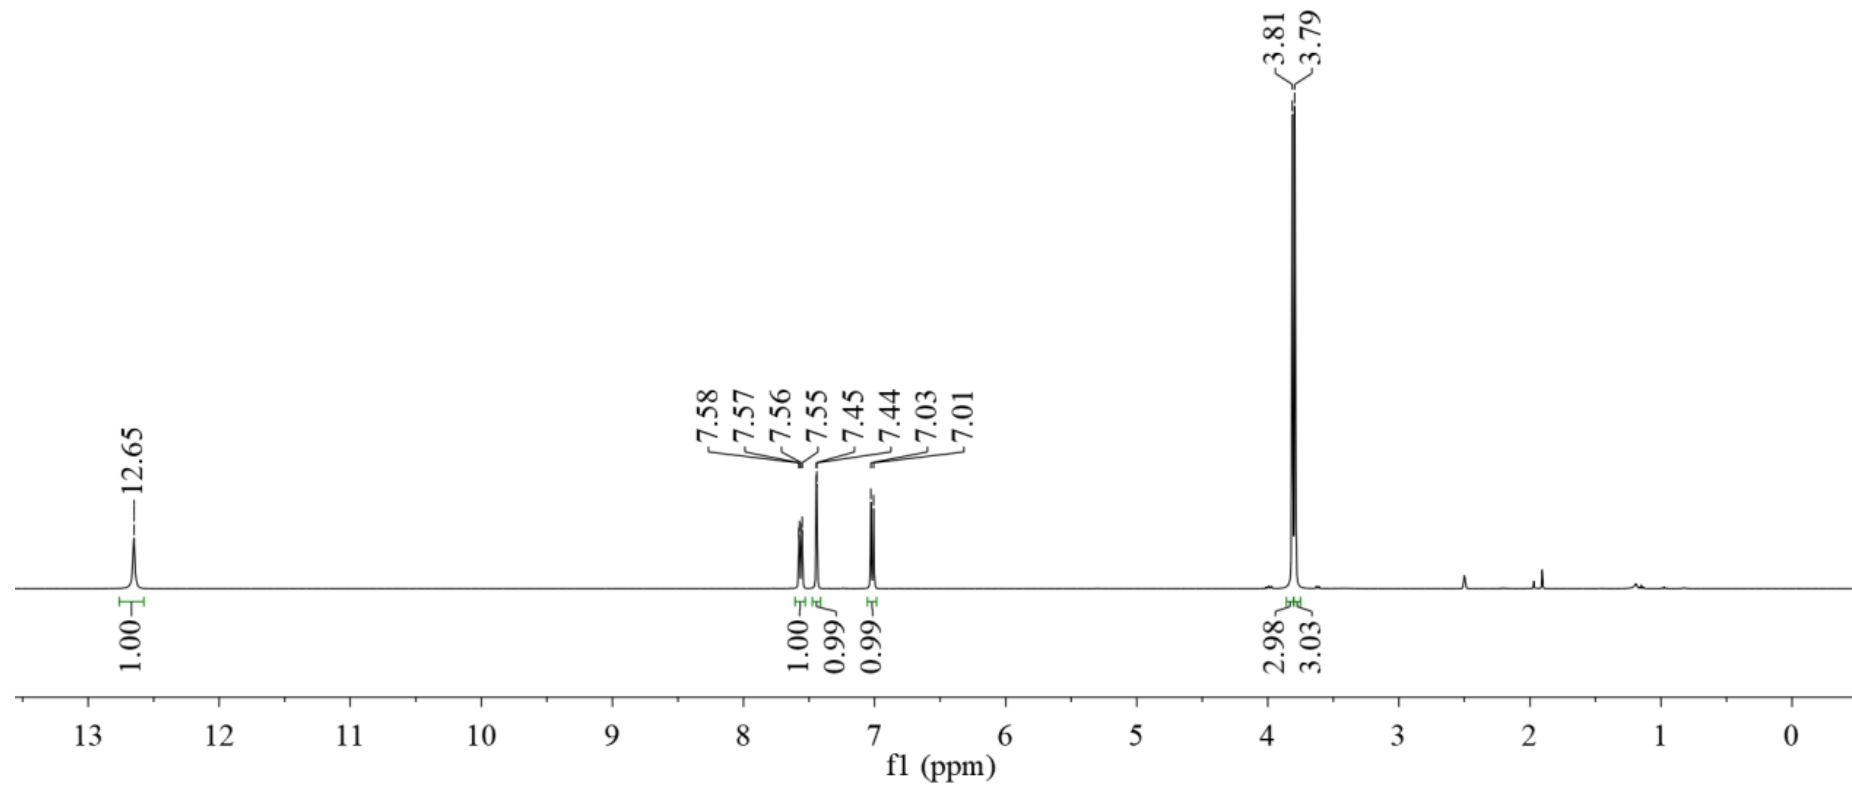

$^{13}\text{C}$  NMR (101 MHz,  $\text{DMSO-}d_6$ ) spectrum of **2s**

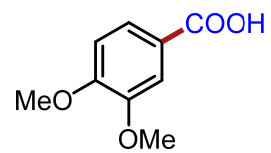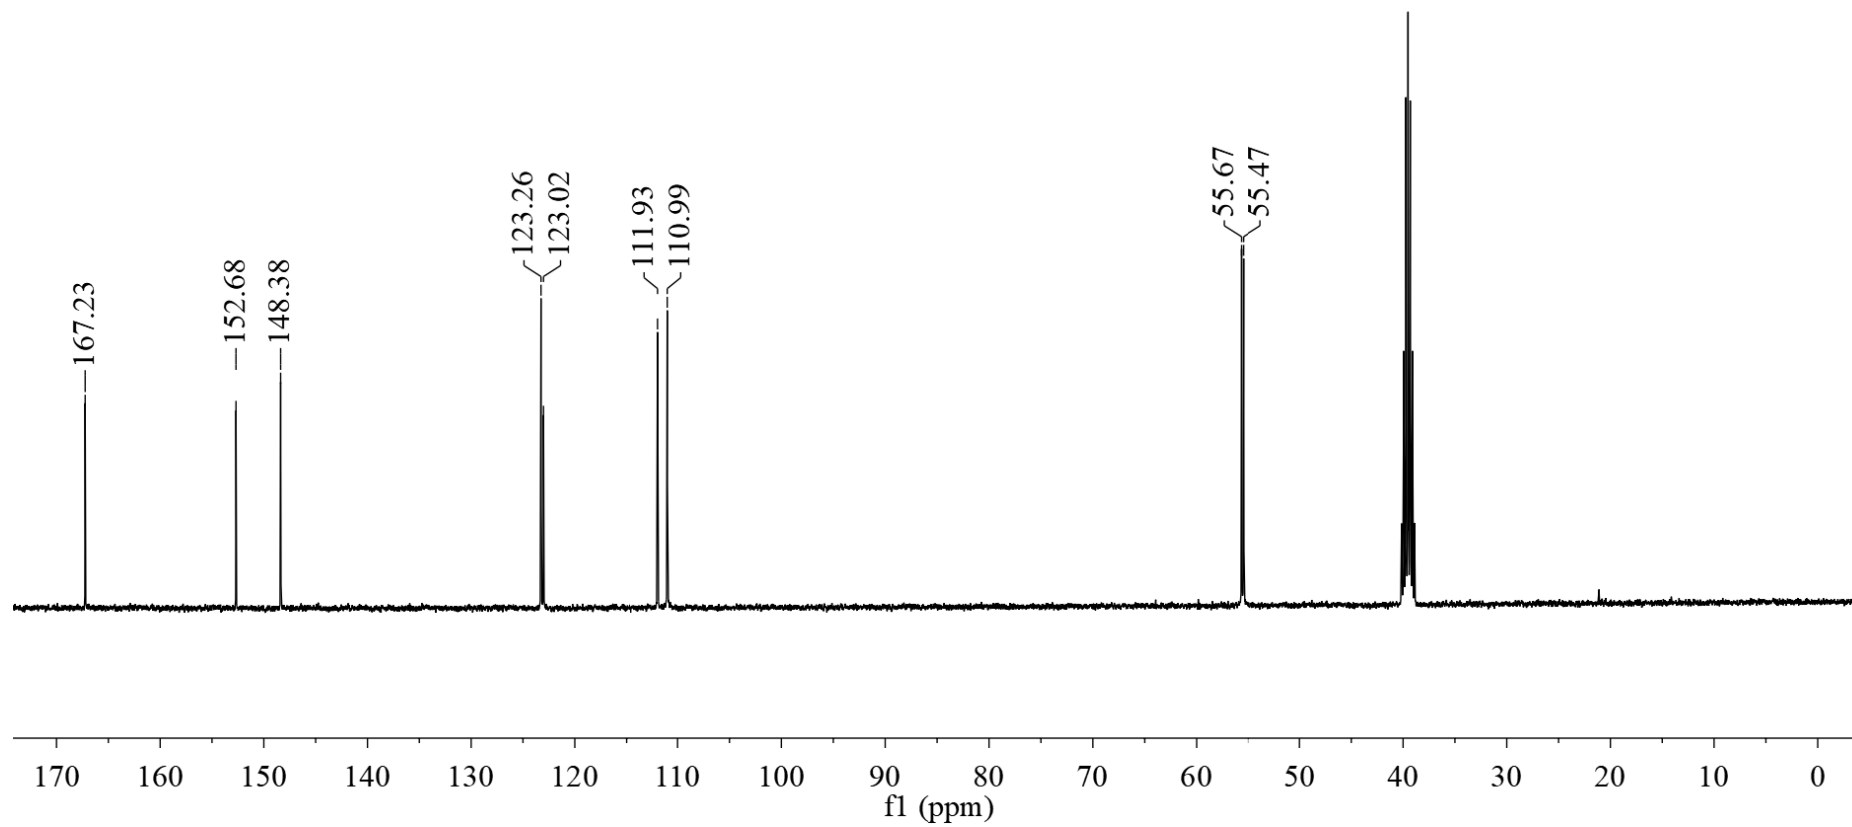

<sup>1</sup>H NMR (400 MHz, DMSO-*d*<sub>6</sub>) spectrum of **2t**

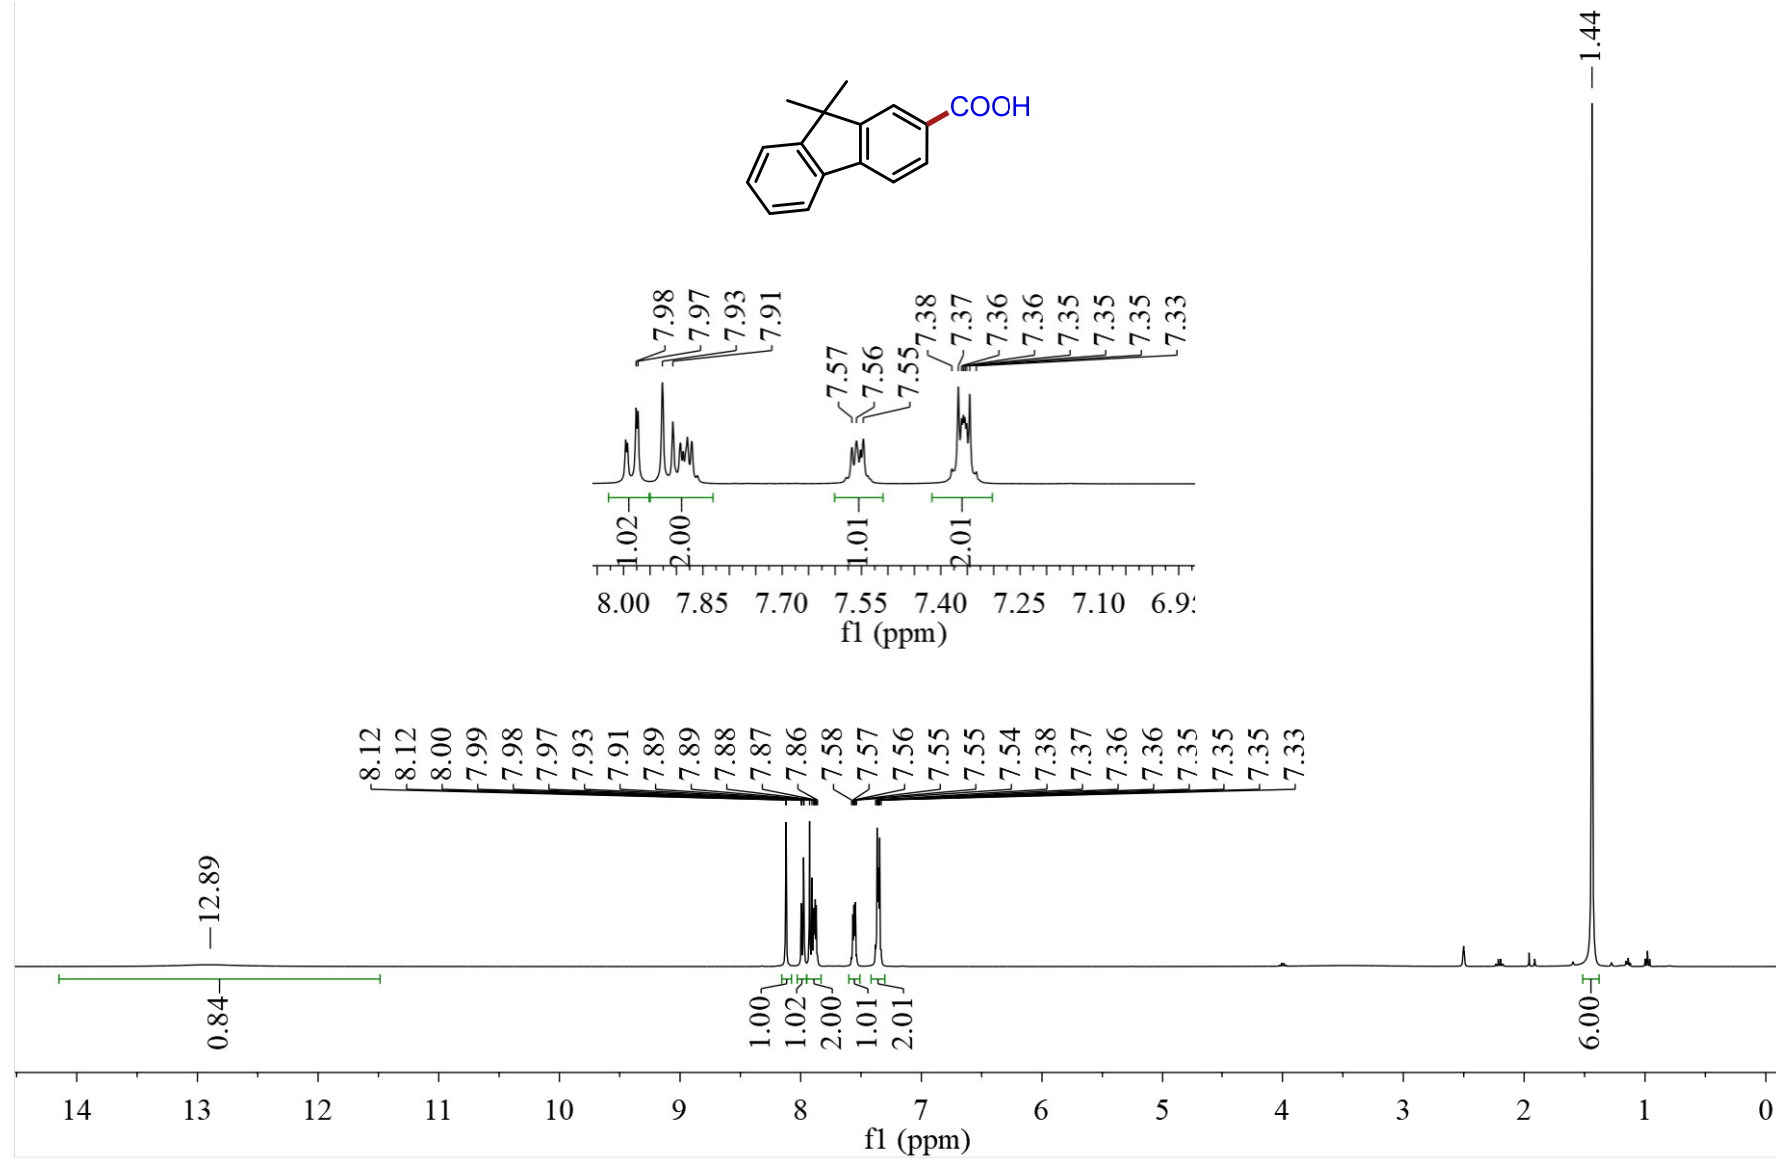

$^{13}\text{C}$  NMR (101 MHz,  $\text{DMSO-}d_6$ ) spectrum of **2t**

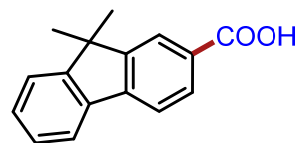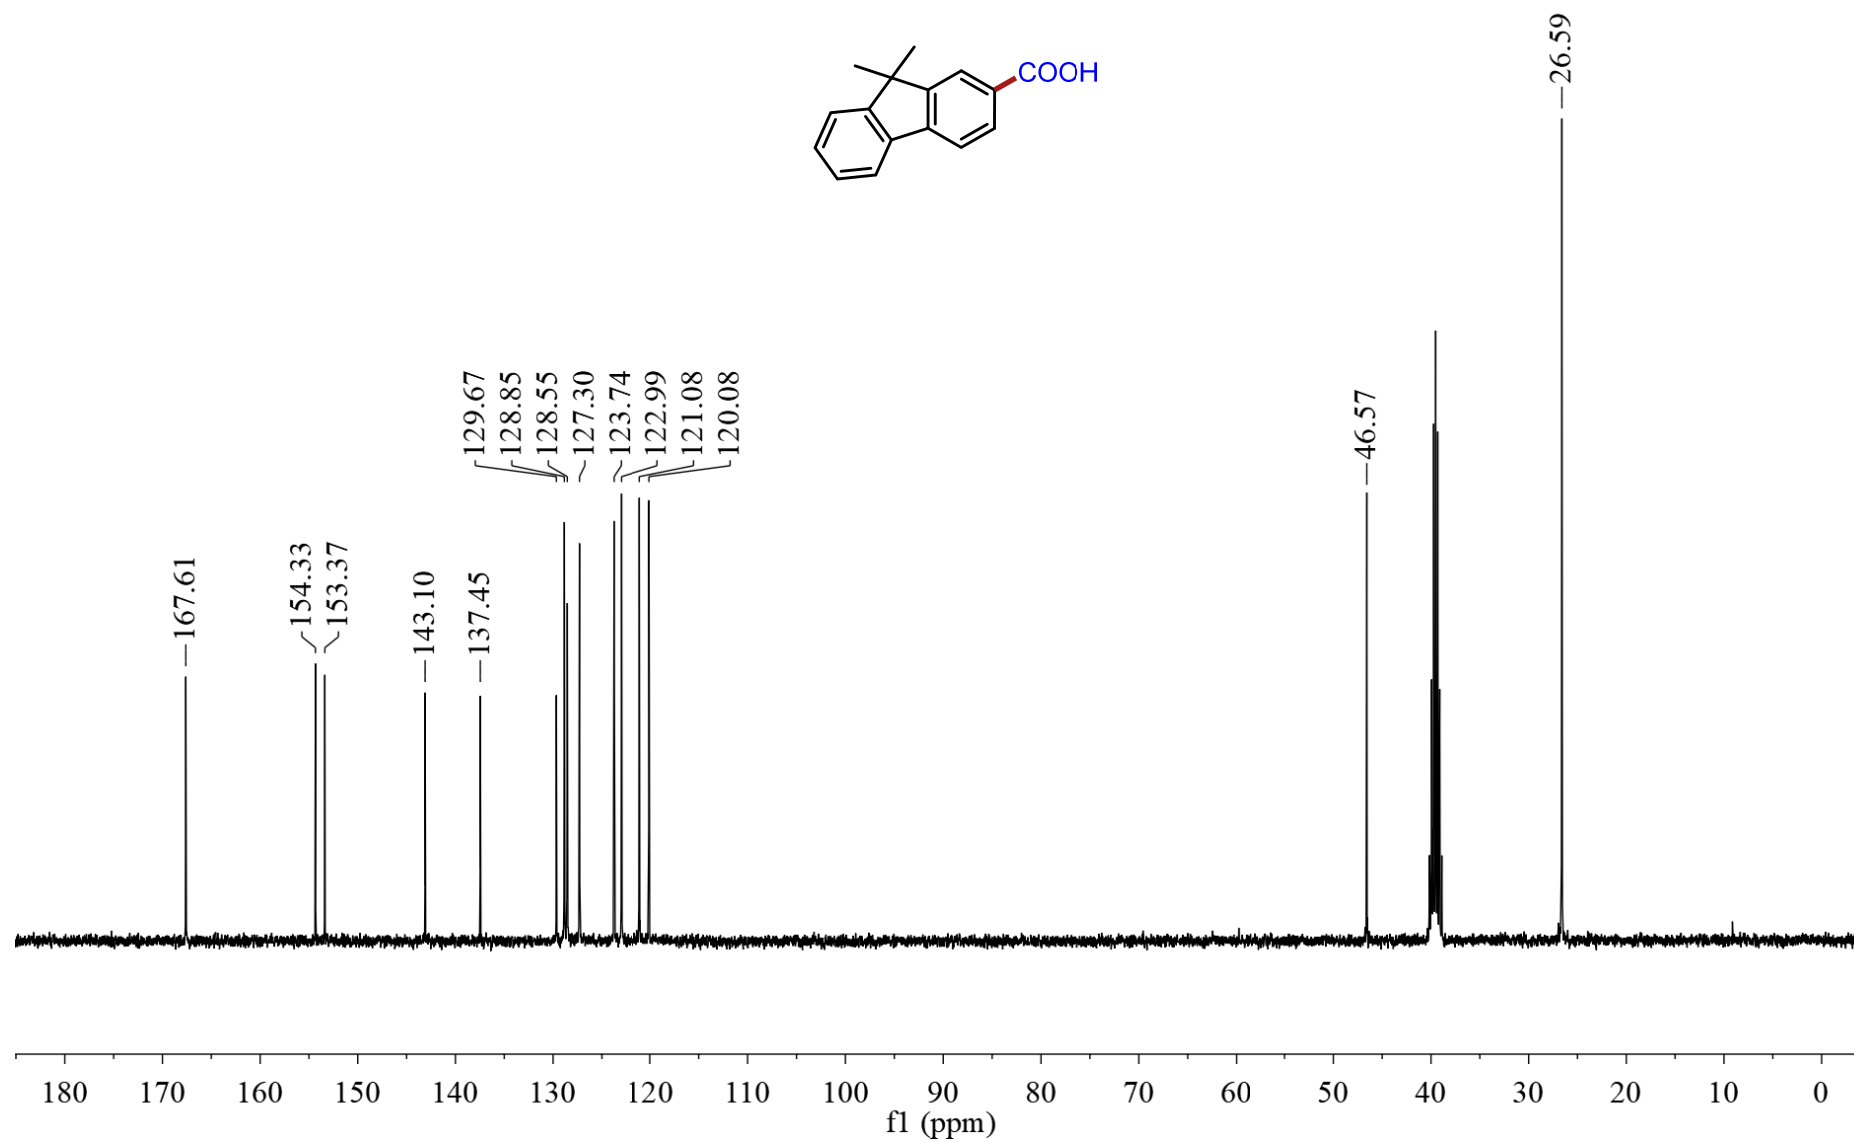



$^1\text{H}$  NMR (400 MHz,  $\text{DMSO-}d_6$ ) spectrum of **2u**

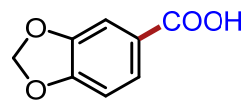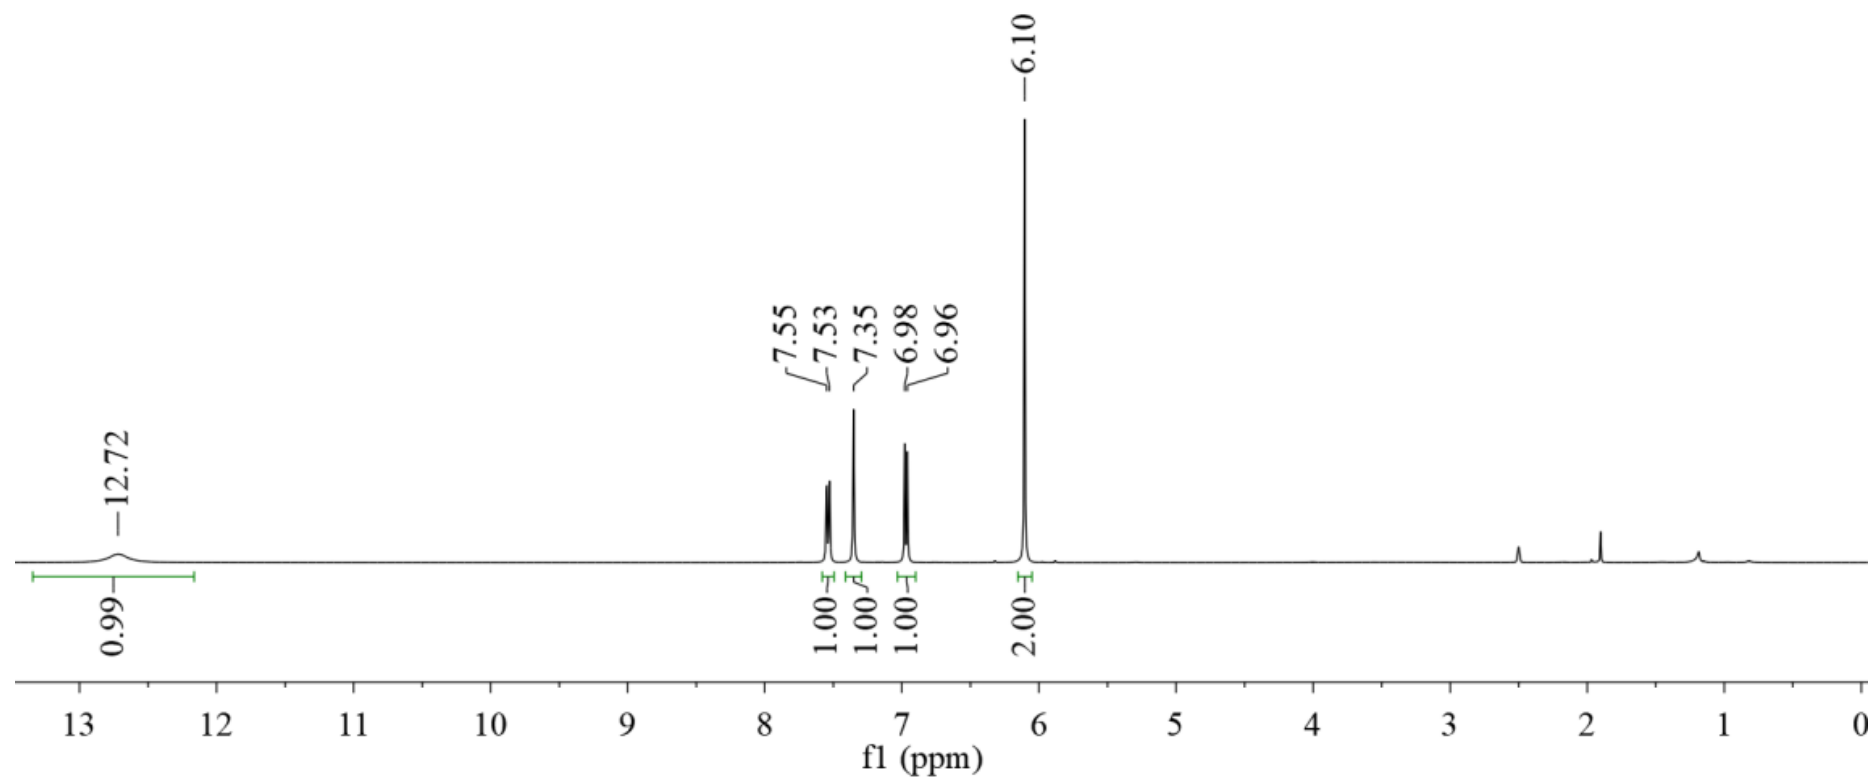

$^{13}\text{C}$  NMR (101 MHz,  $\text{DMSO-}d_6$ ) spectrum of **2u**

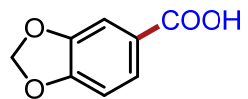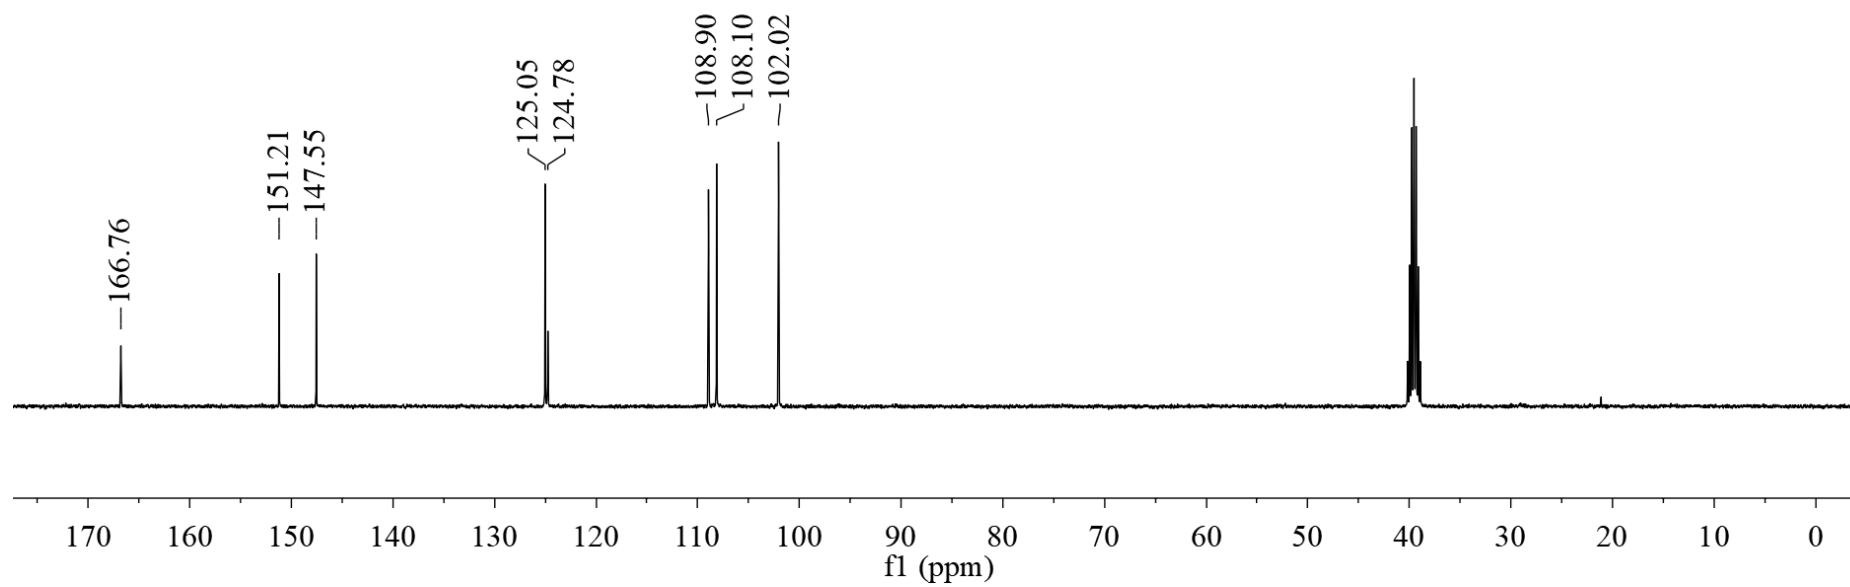

$^1\text{H}$  NMR (400 MHz,  $\text{DMSO-}d_6$ ) spectrum of **2v**

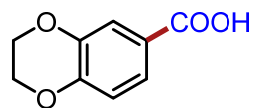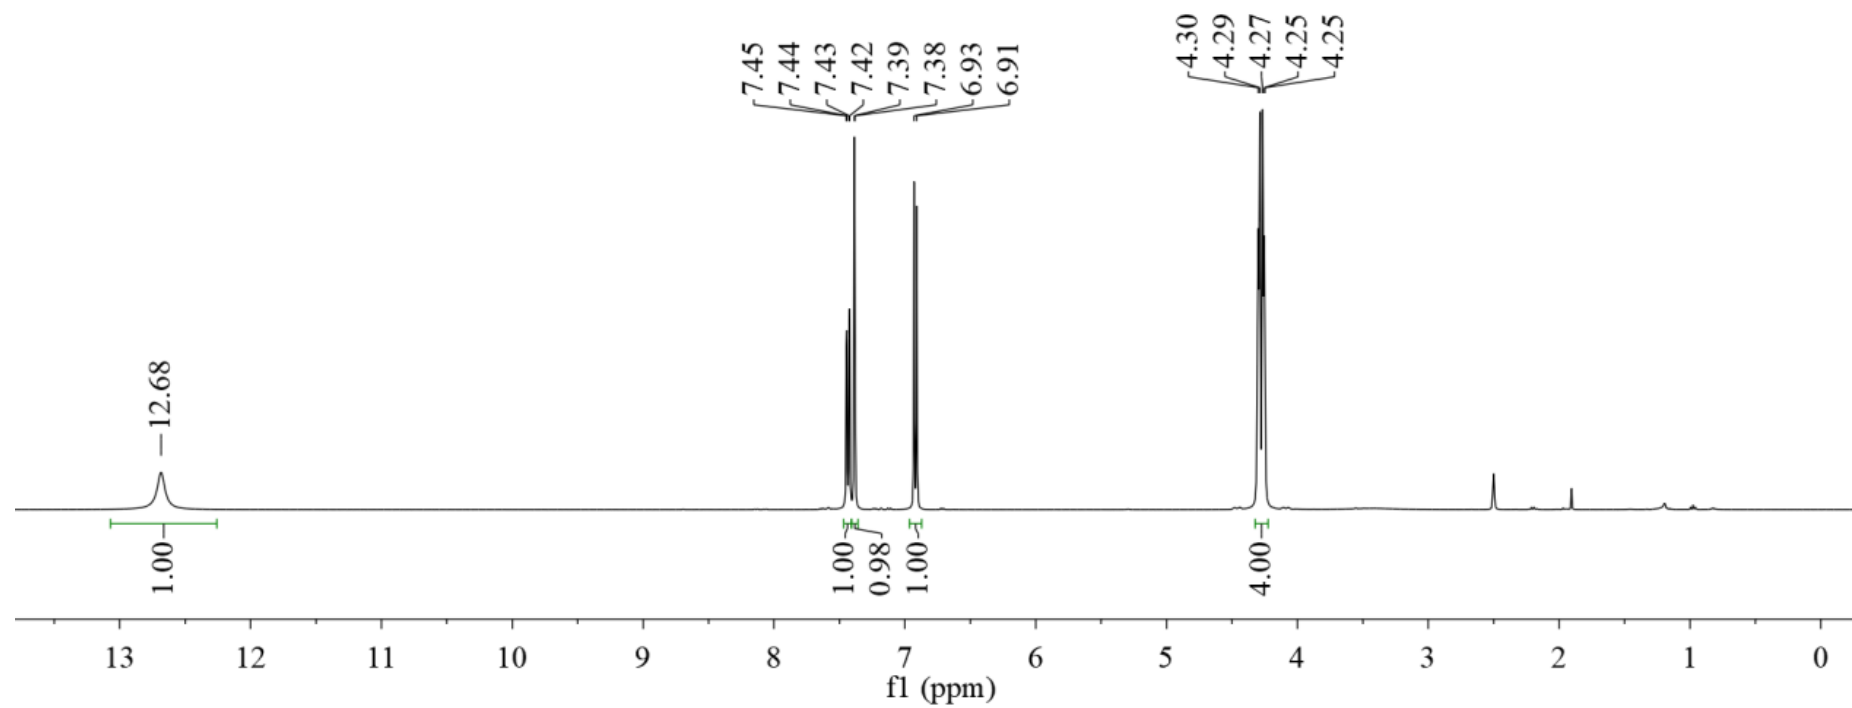

$^{13}\text{C}$  NMR (101 MHz,  $\text{DMSO-}d_6$ ) spectrum of **2v**

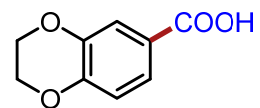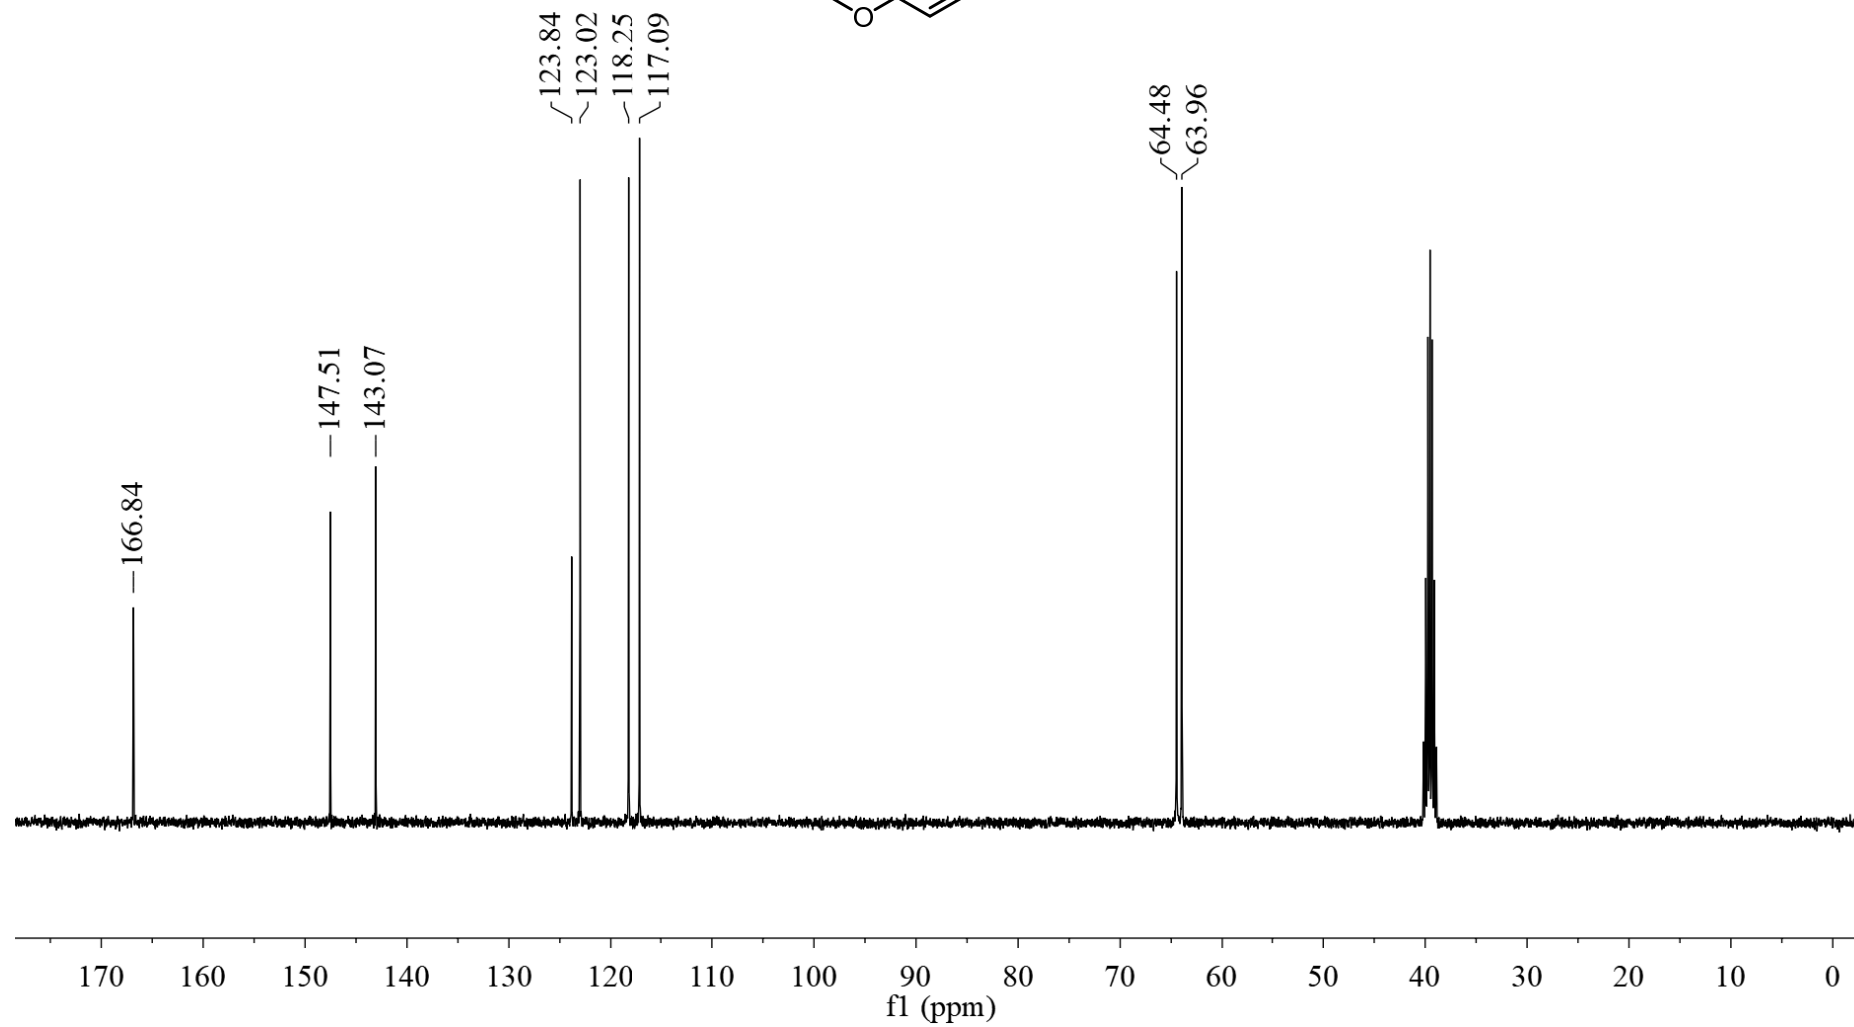

$^1\text{H}$  NMR (400 MHz,  $\text{DMSO-}d_6$ ) spectrum of **2w**

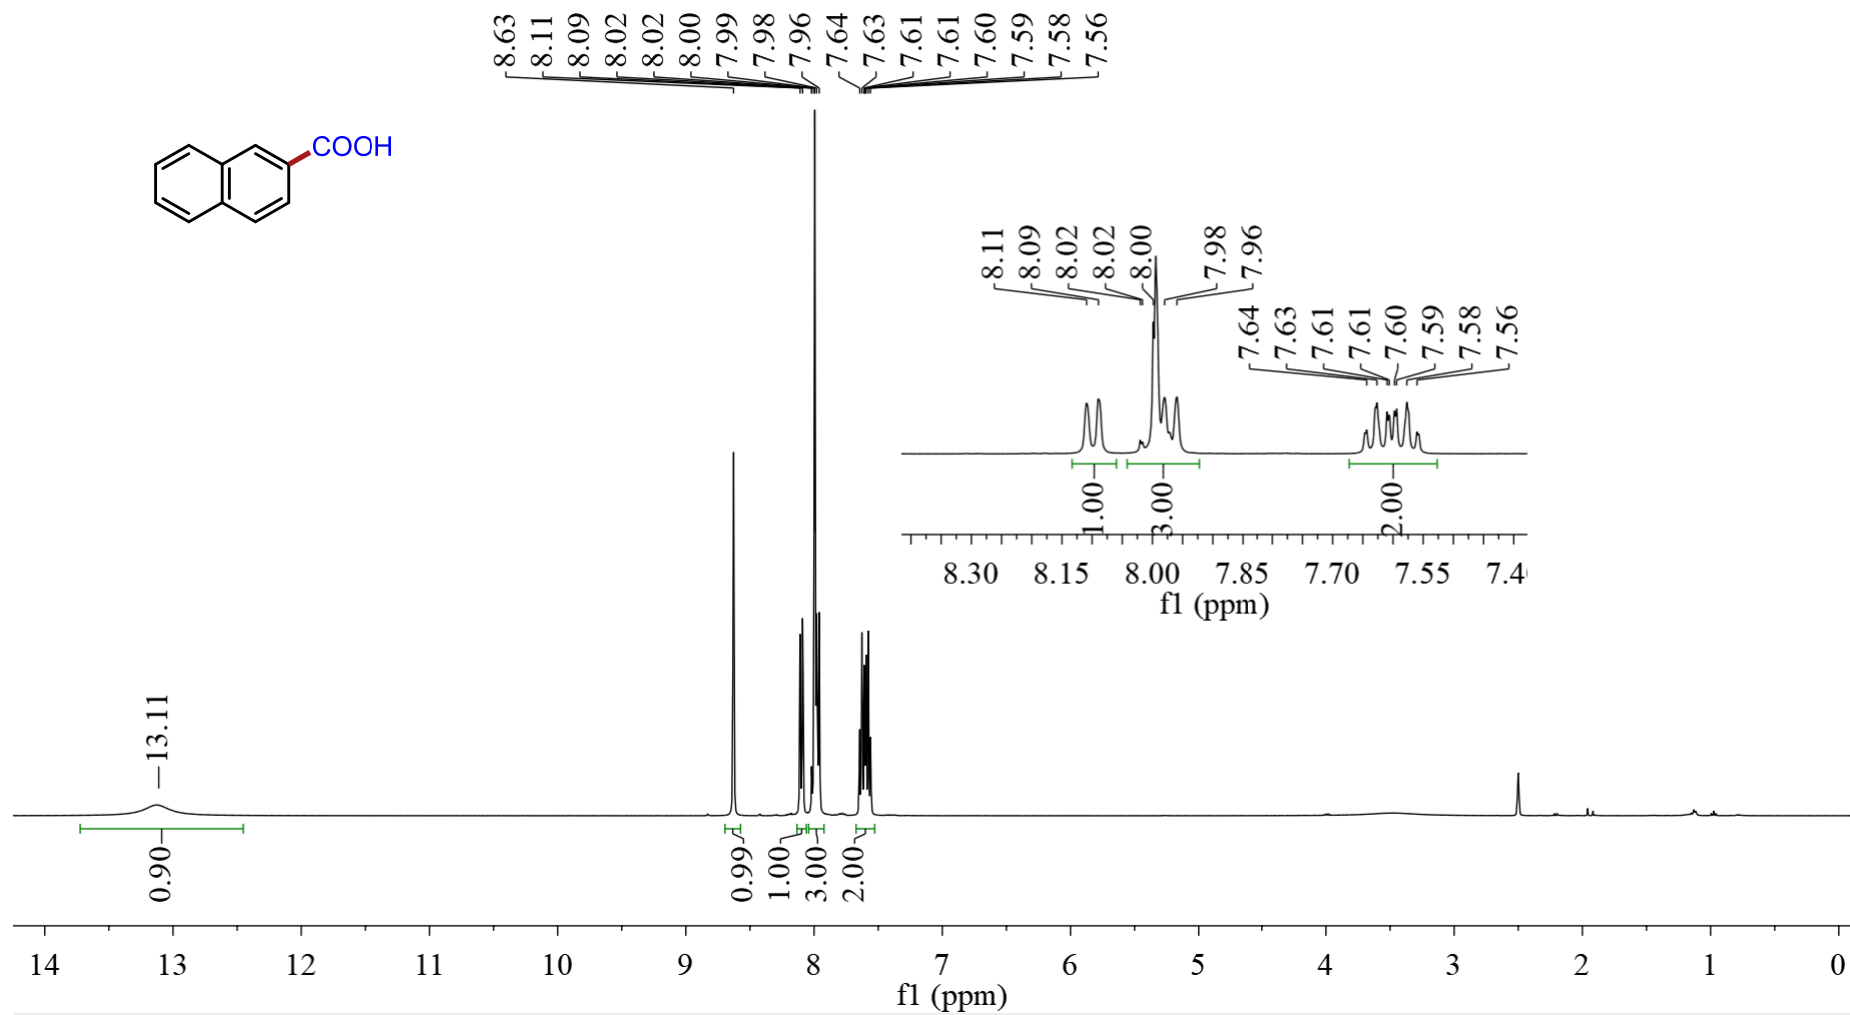

$^{13}\text{C}$  NMR (101 MHz,  $\text{DMSO-}d_6$ ) spectrum of **2w**

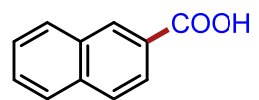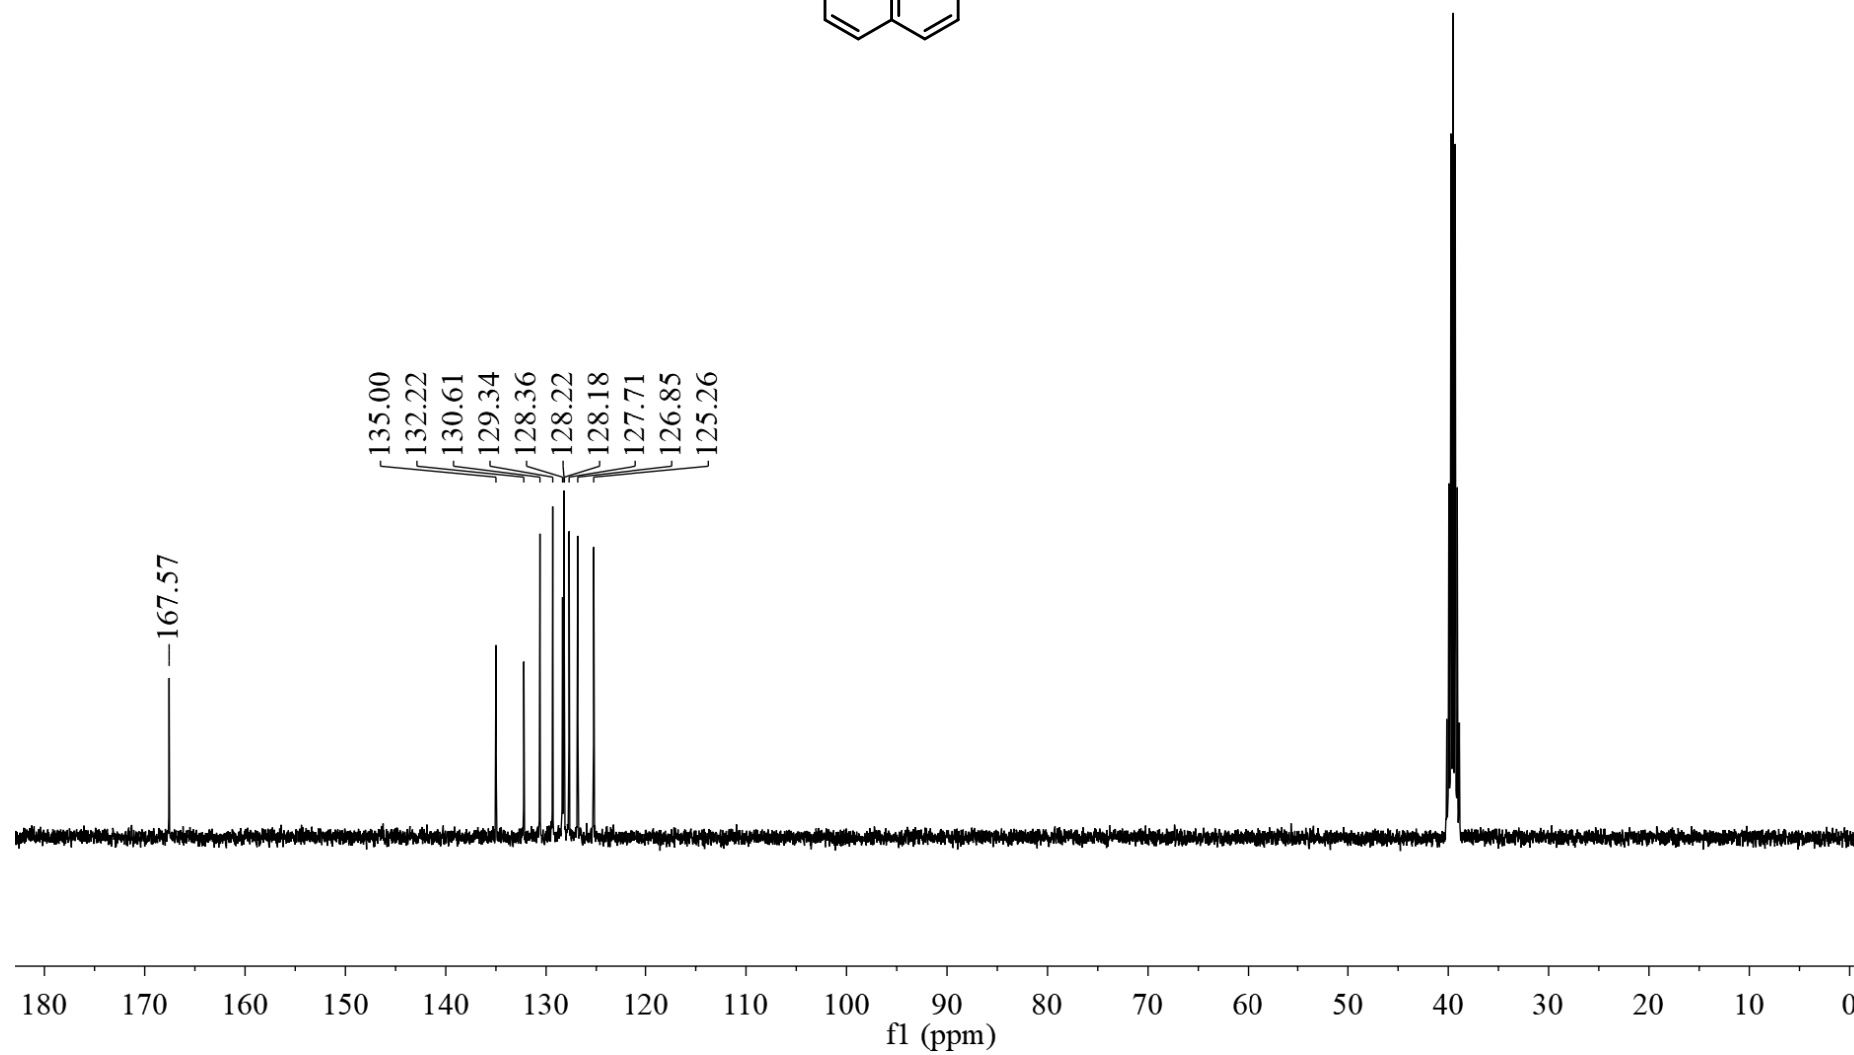

$^1\text{H}$  NMR (400 MHz,  $\text{DMSO-}d_6$ ) spectrum of **2x**

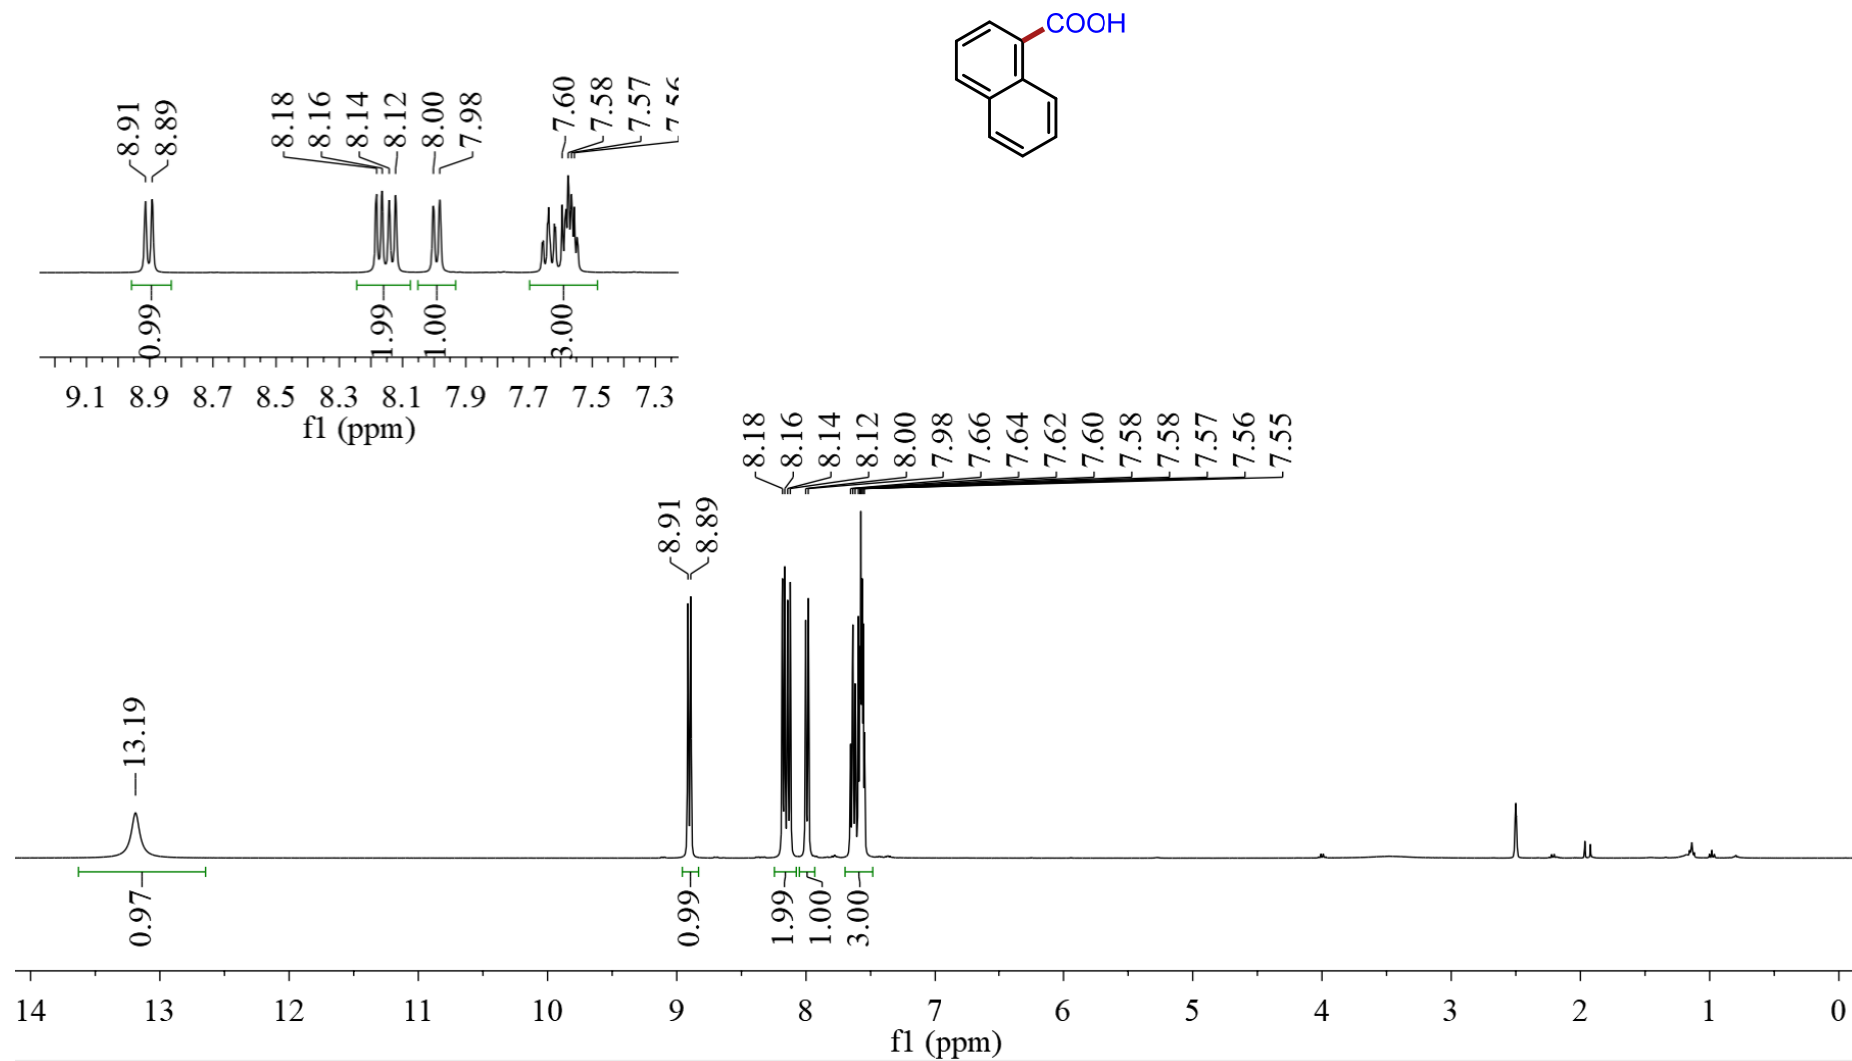

$^{13}\text{C}$  NMR (101 MHz,  $\text{DMSO-}d_6$ ) spectrum of **2x**

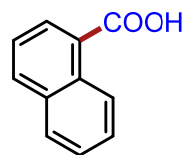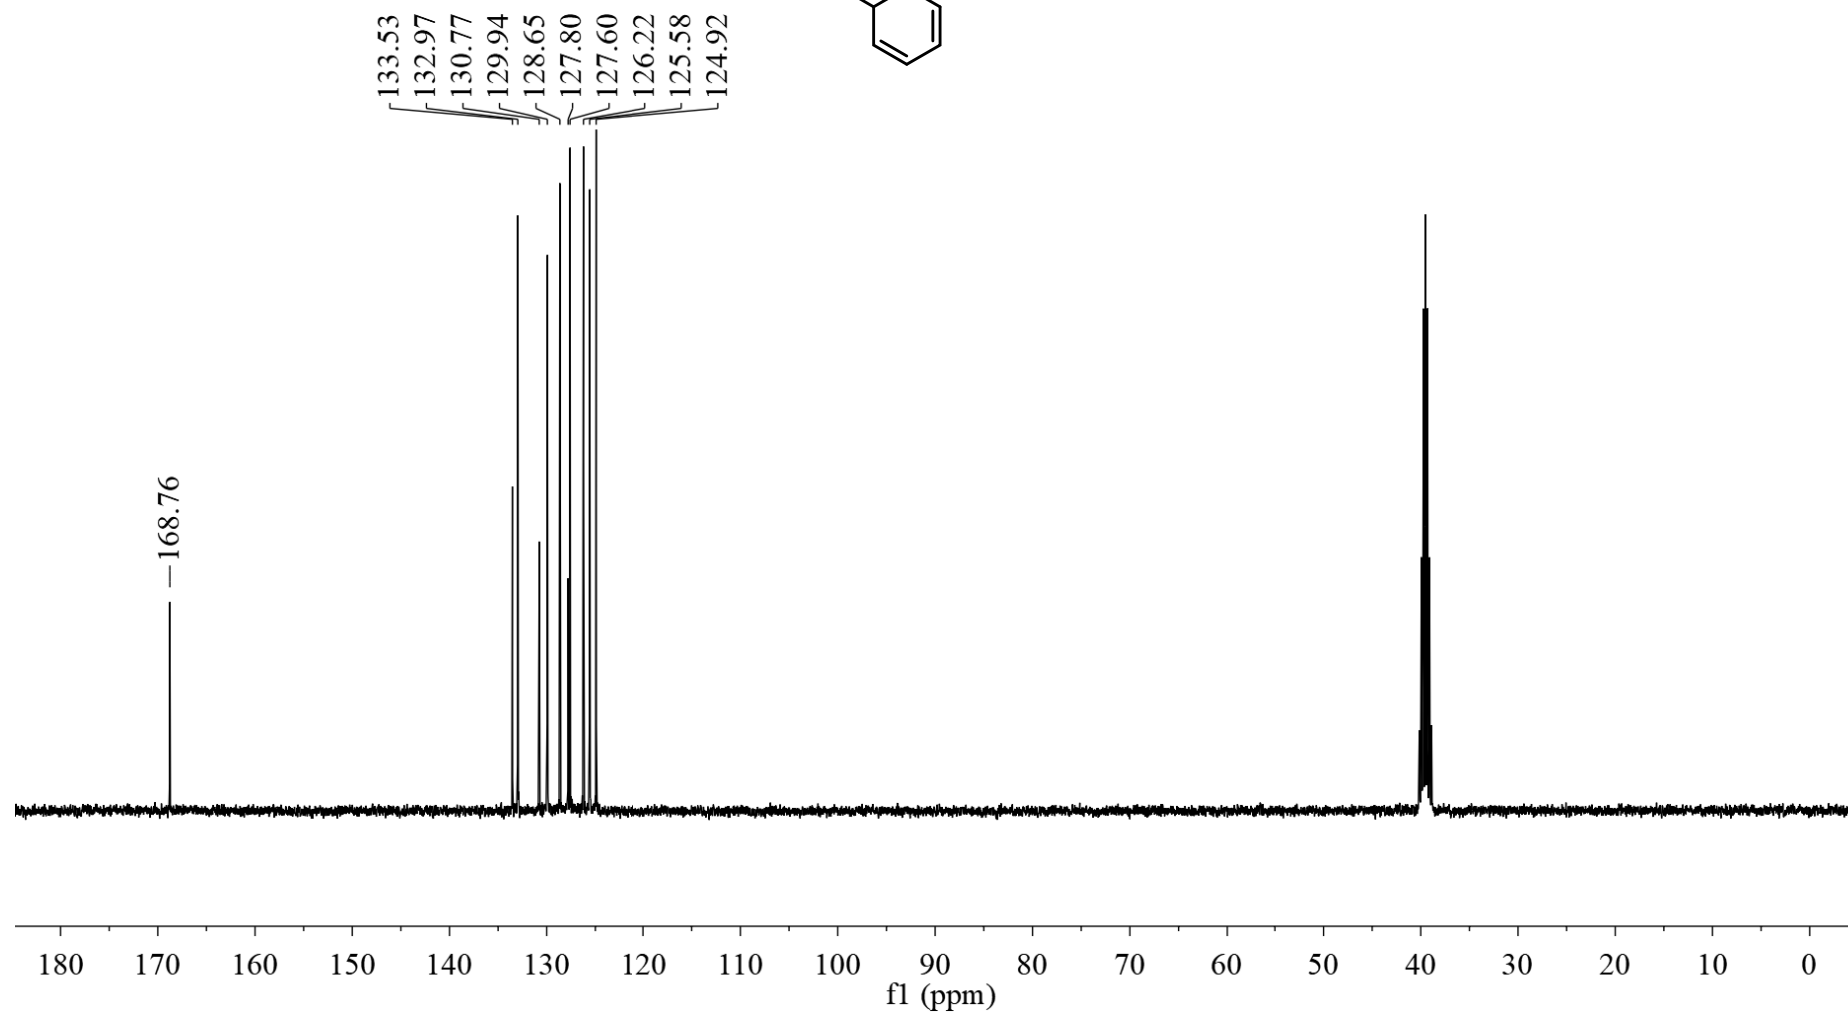



$^1\text{H}$  NMR (400 MHz,  $\text{DMSO-}d_6$ ) spectrum of **2y**

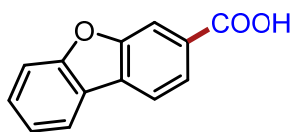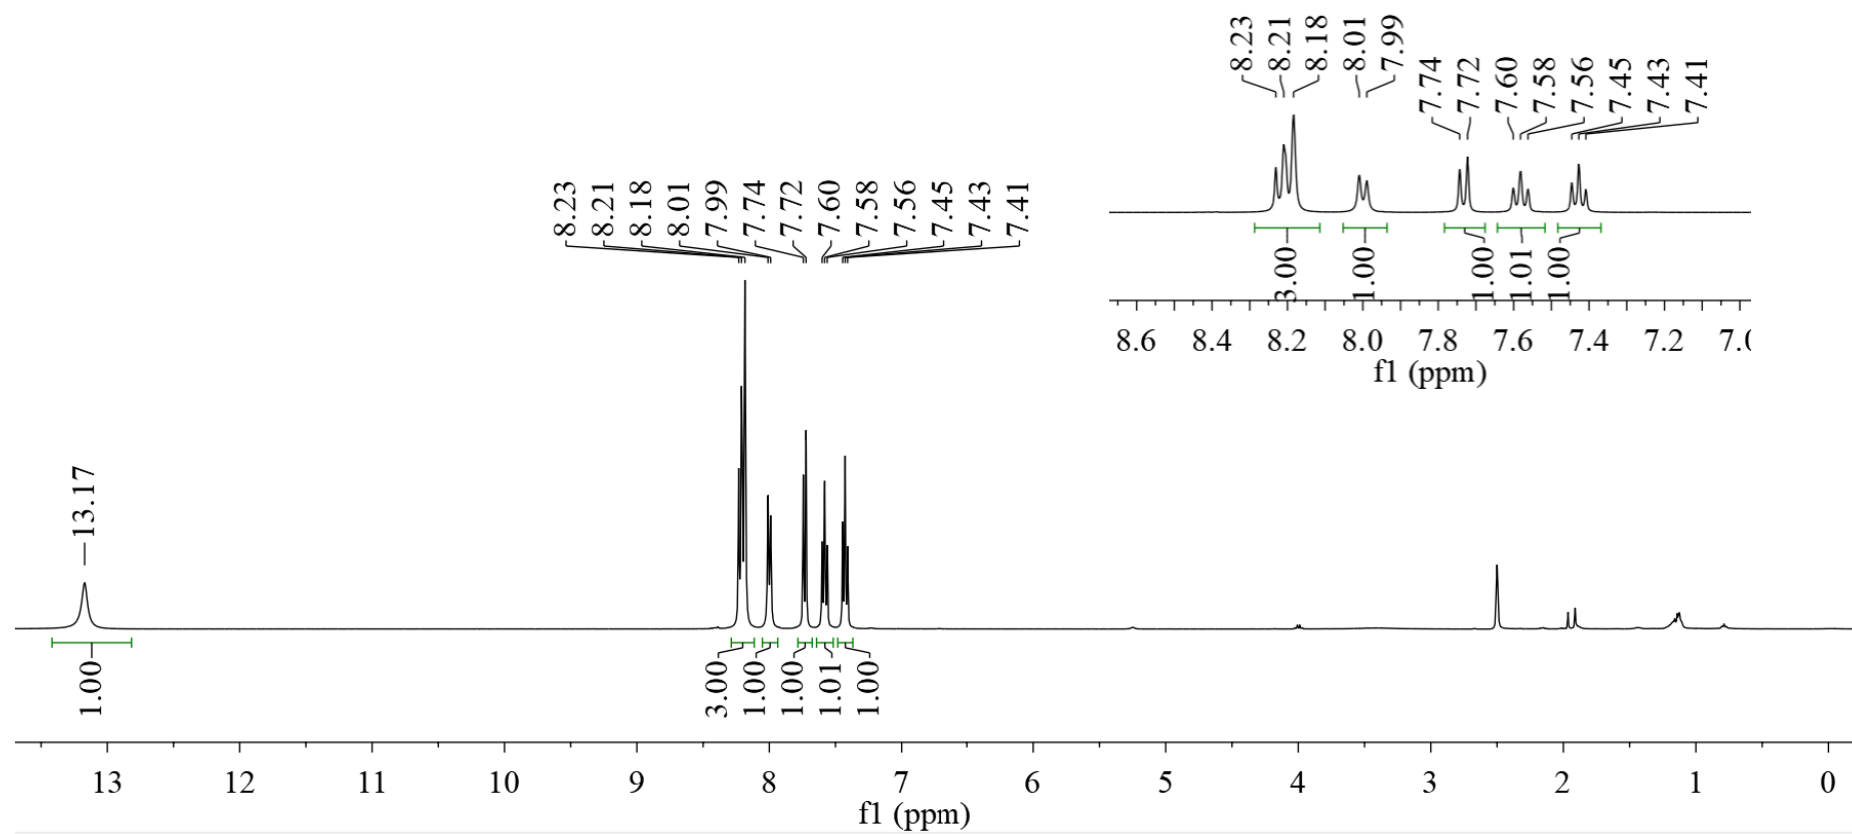

$^{13}\text{C}$  NMR (101 MHz,  $\text{DMSO-}d_6$ ) spectrum of **2y**

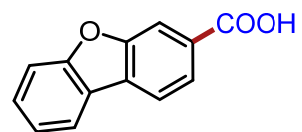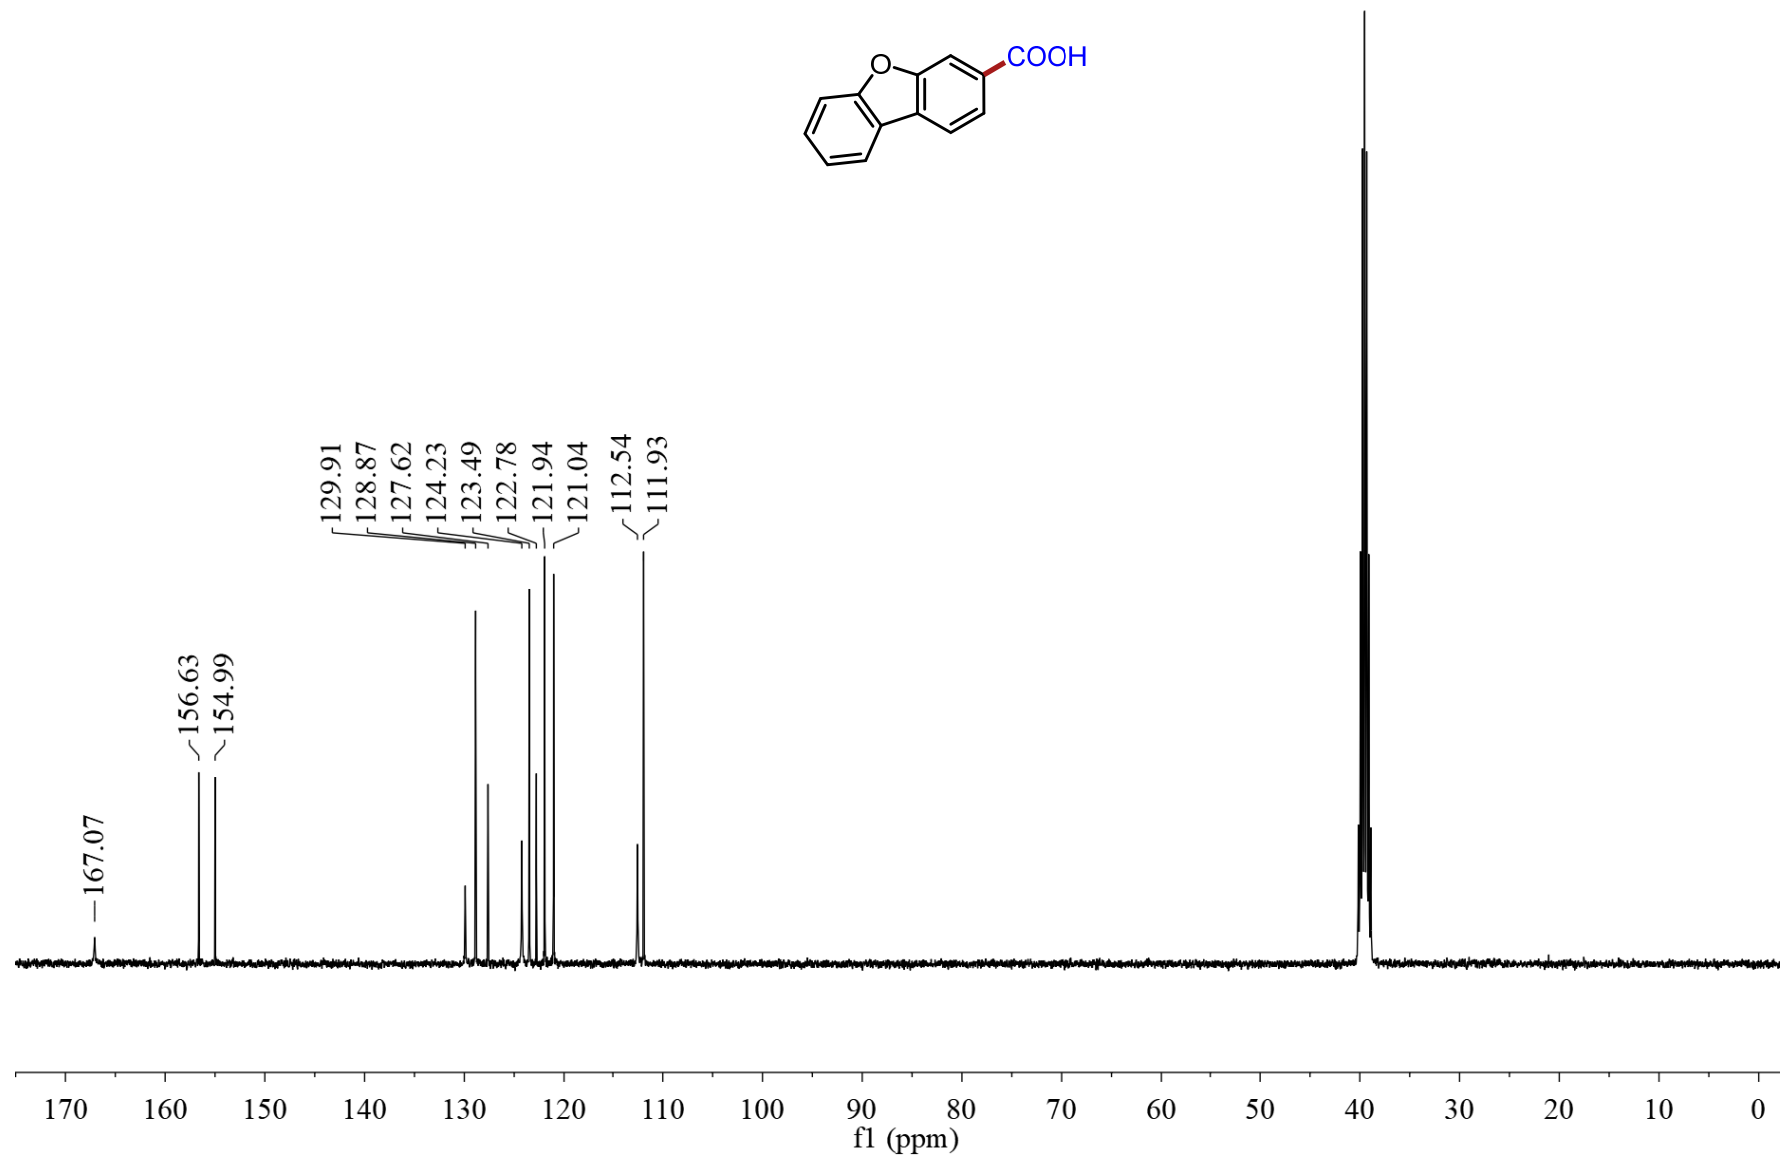

$^1\text{H}$  NMR (400 MHz,  $\text{DMSO-}d_6$ ) spectrum of **2z**

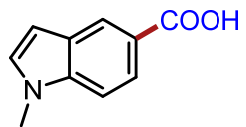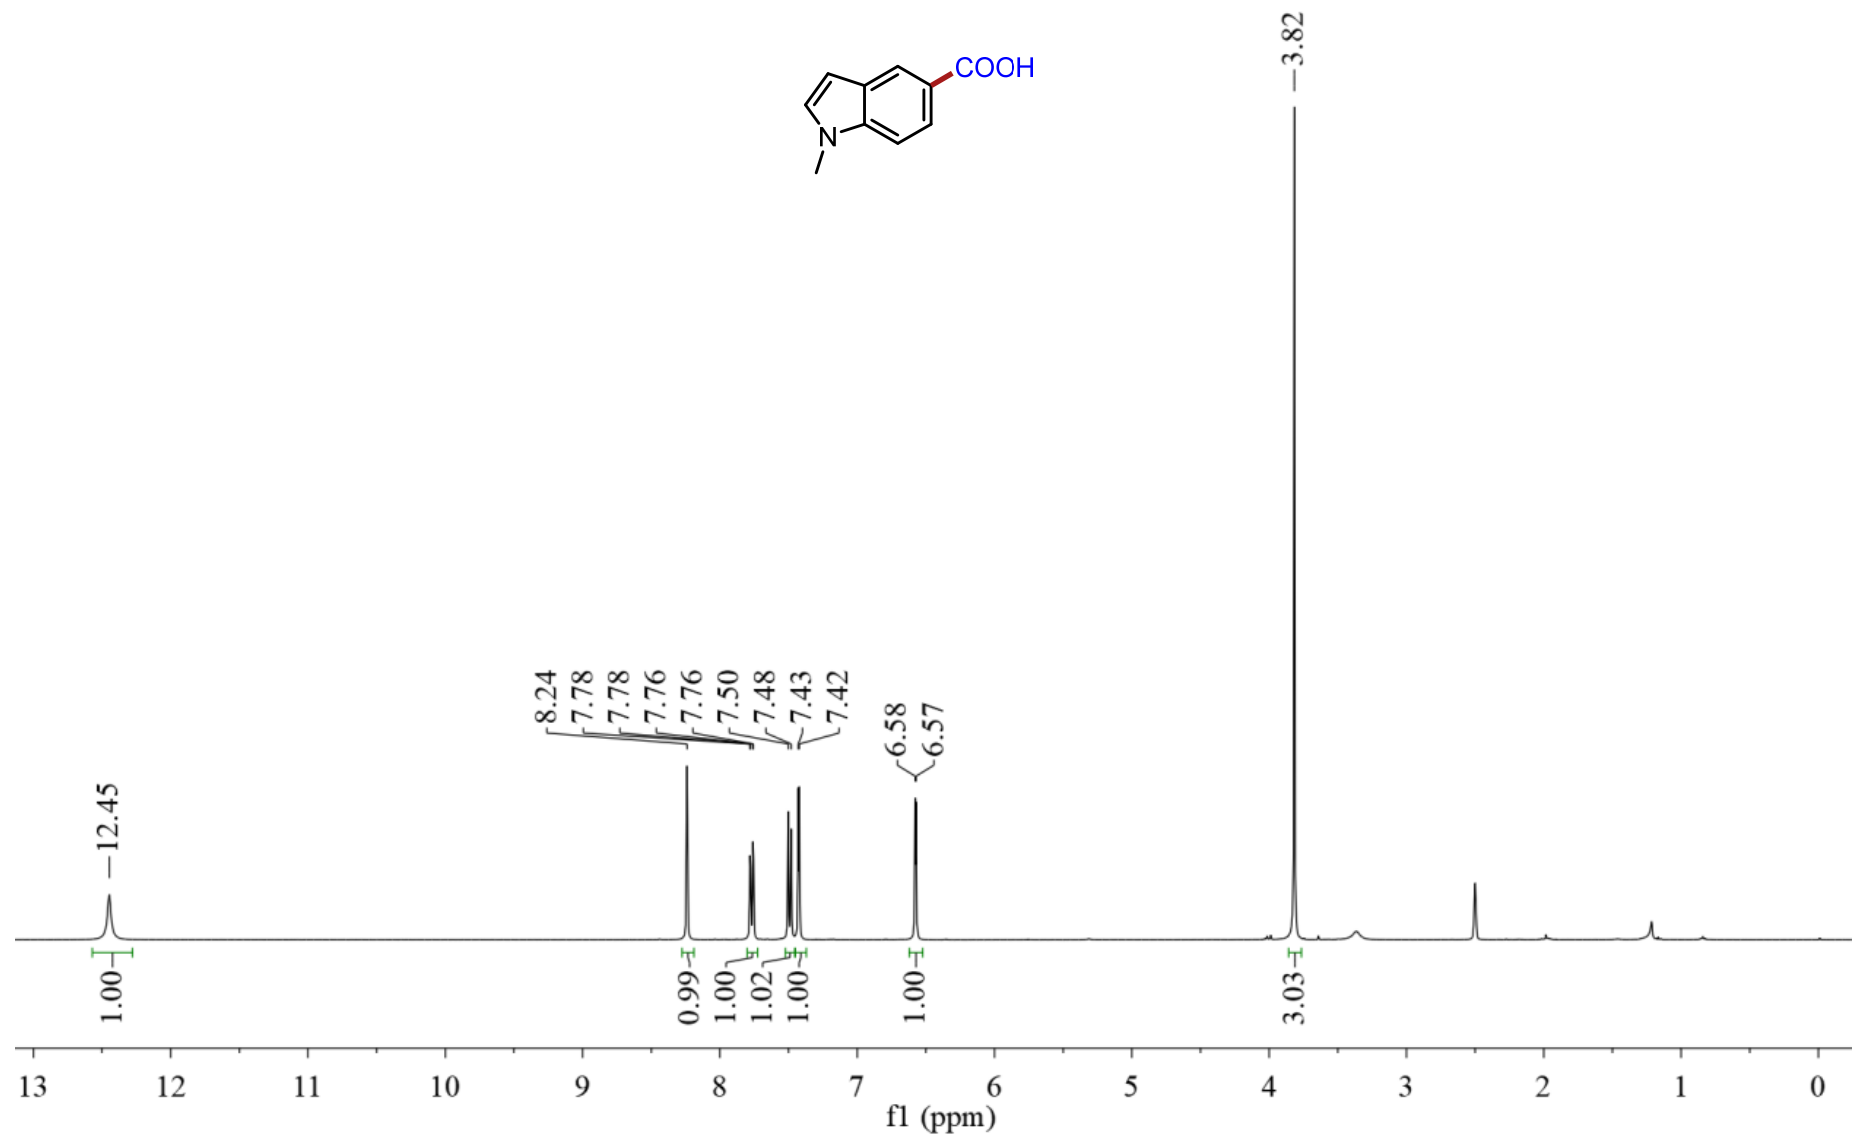

$^{13}\text{C}$  NMR (101 MHz,  $\text{DMSO-}d_6$ ) spectrum of **2z**

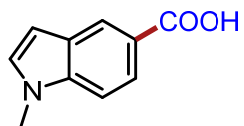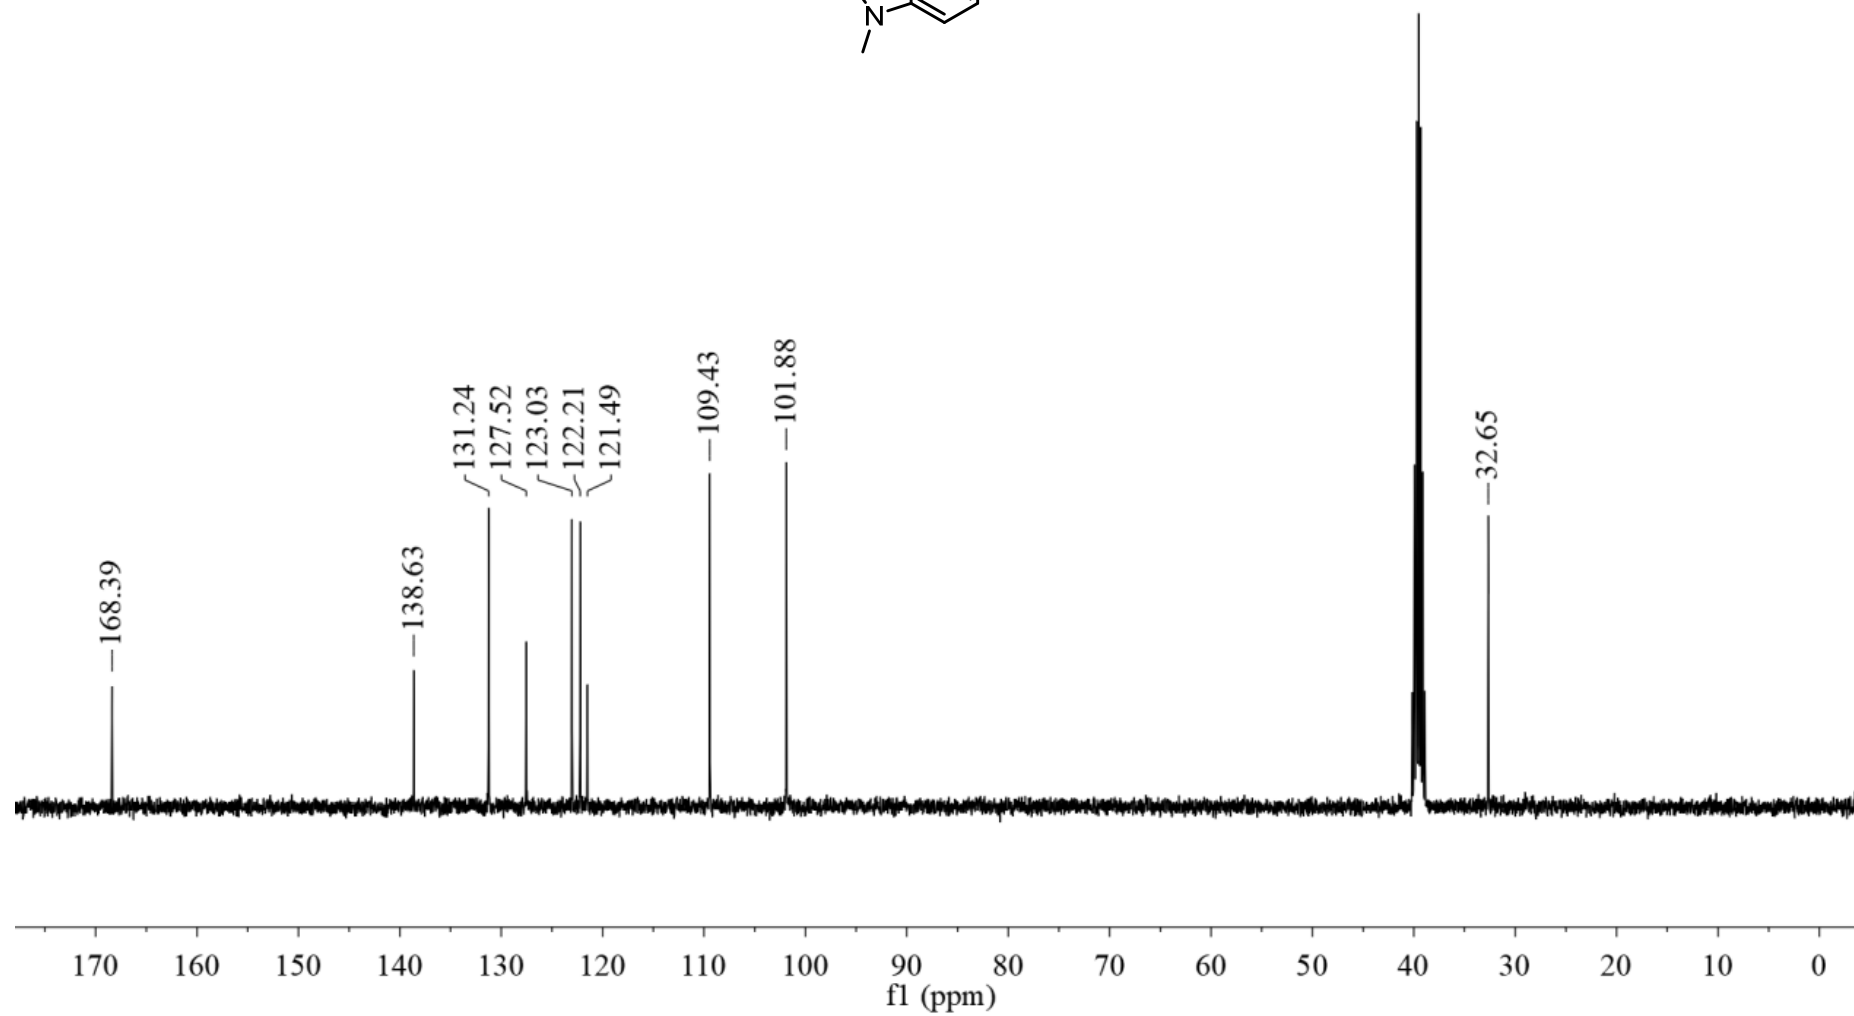

$^1\text{H}$  NMR (400 MHz,  $\text{DMSO-}d_6$ ) spectrum of **2aa**

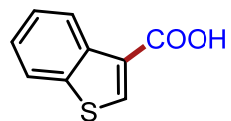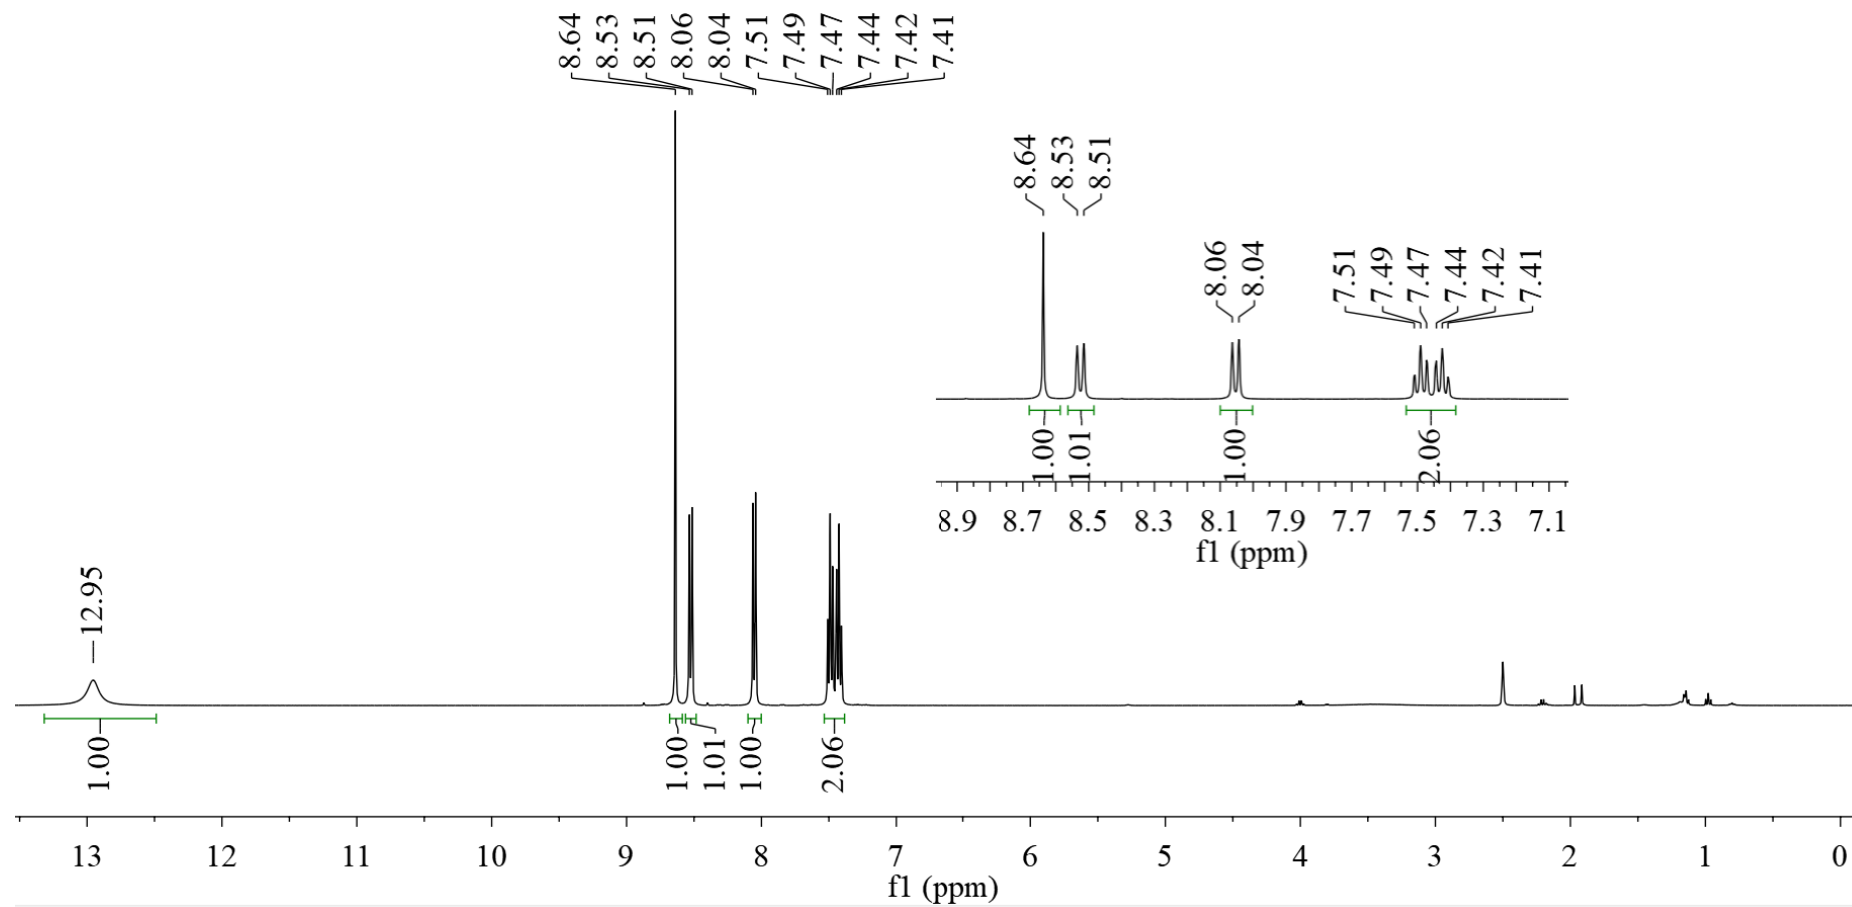

$^{13}\text{C}$  NMR (101 MHz,  $\text{DMSO-}d_6$ ) spectrum of **2aa**

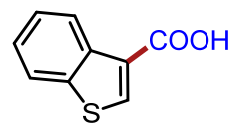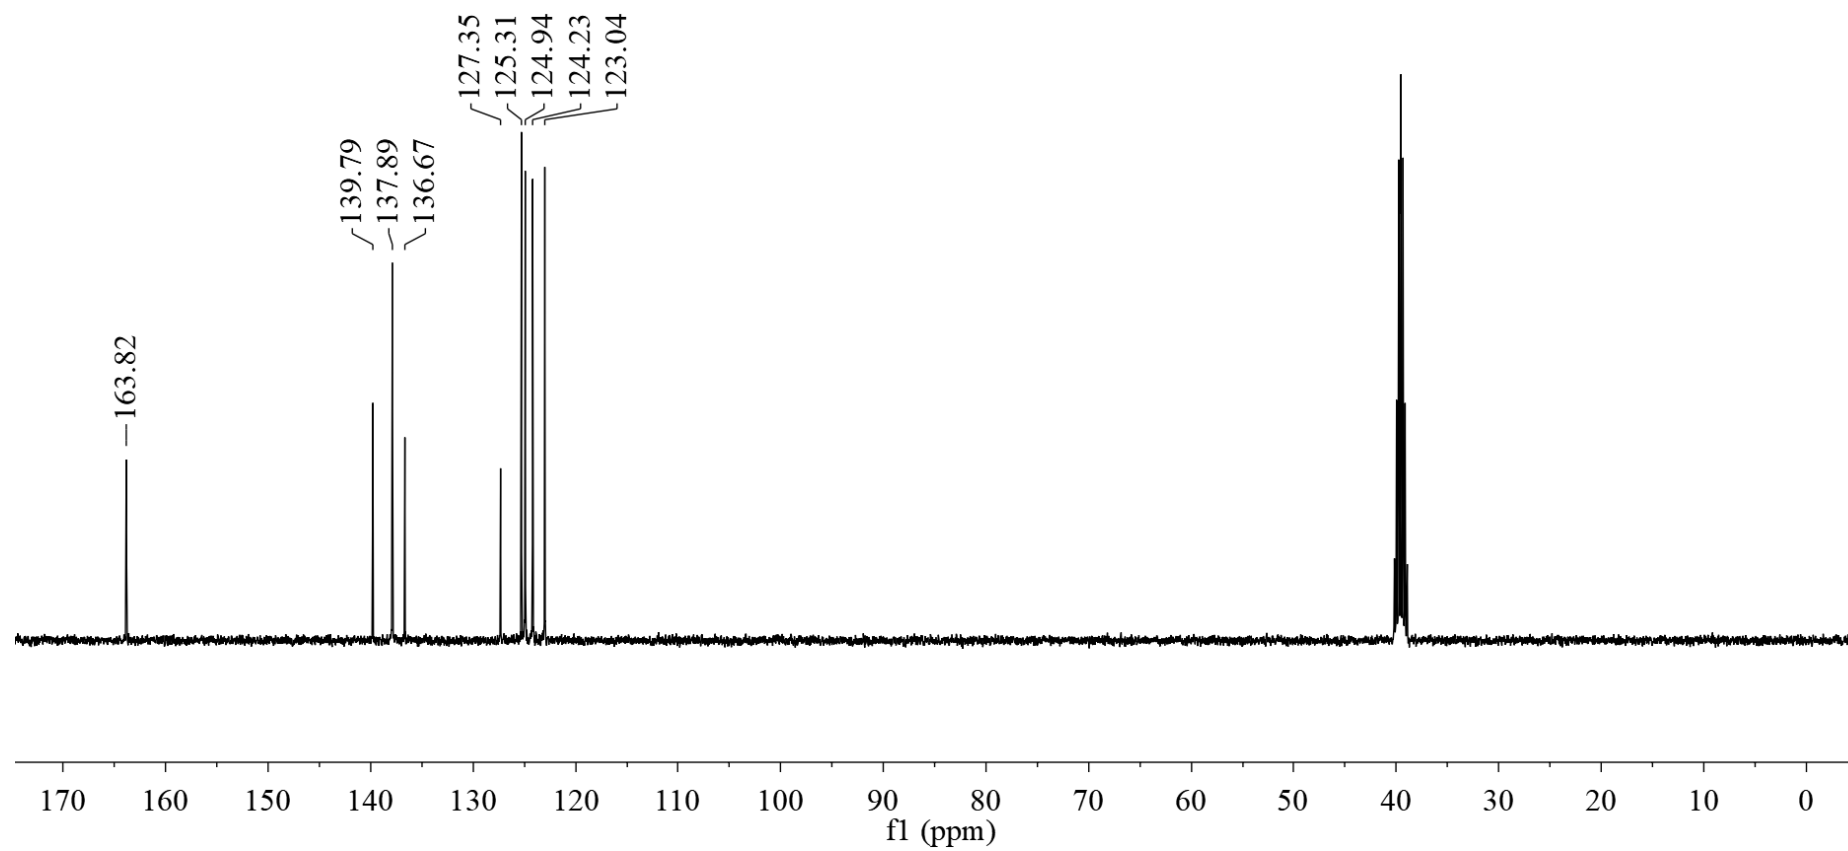

<sup>1</sup>H NMR (400 MHz, DMSO-*d*<sub>6</sub>) spectrum of **2ab**

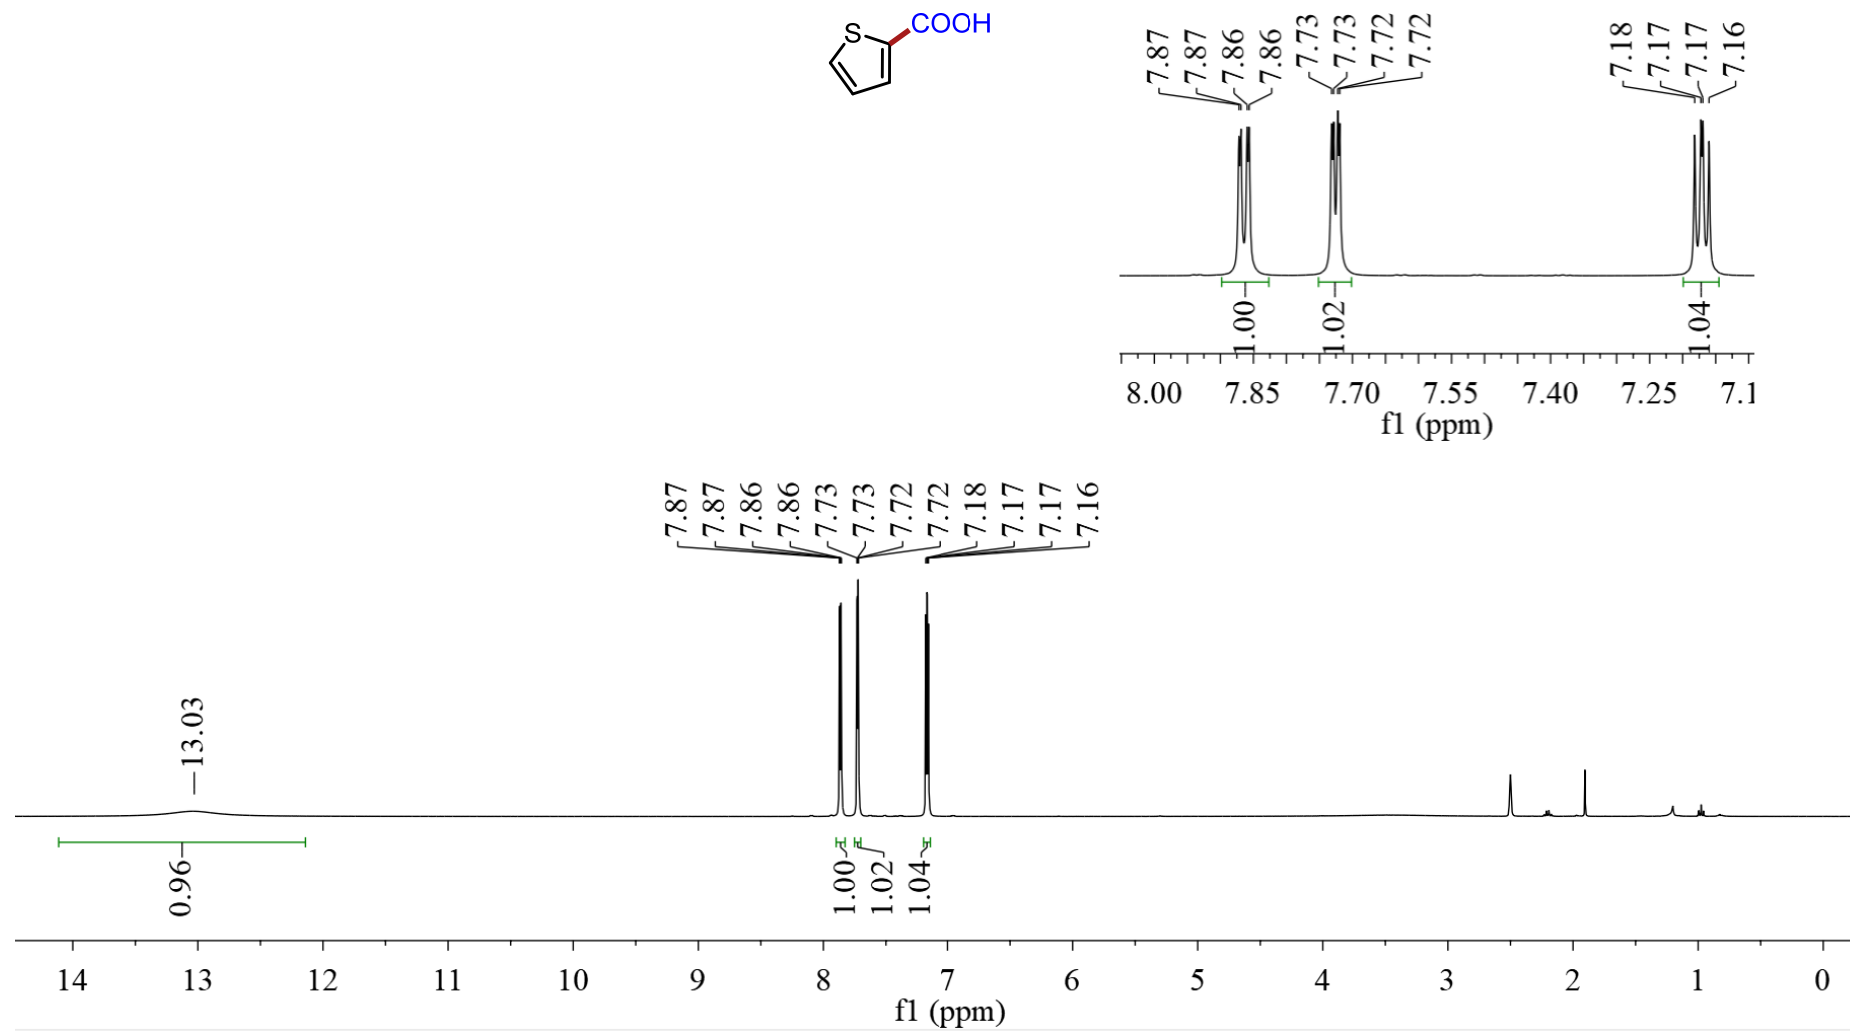

$^{13}\text{C}$  NMR (101 MHz,  $\text{DMSO-}d_6$ ) spectrum of **2ab**

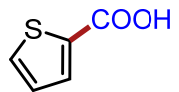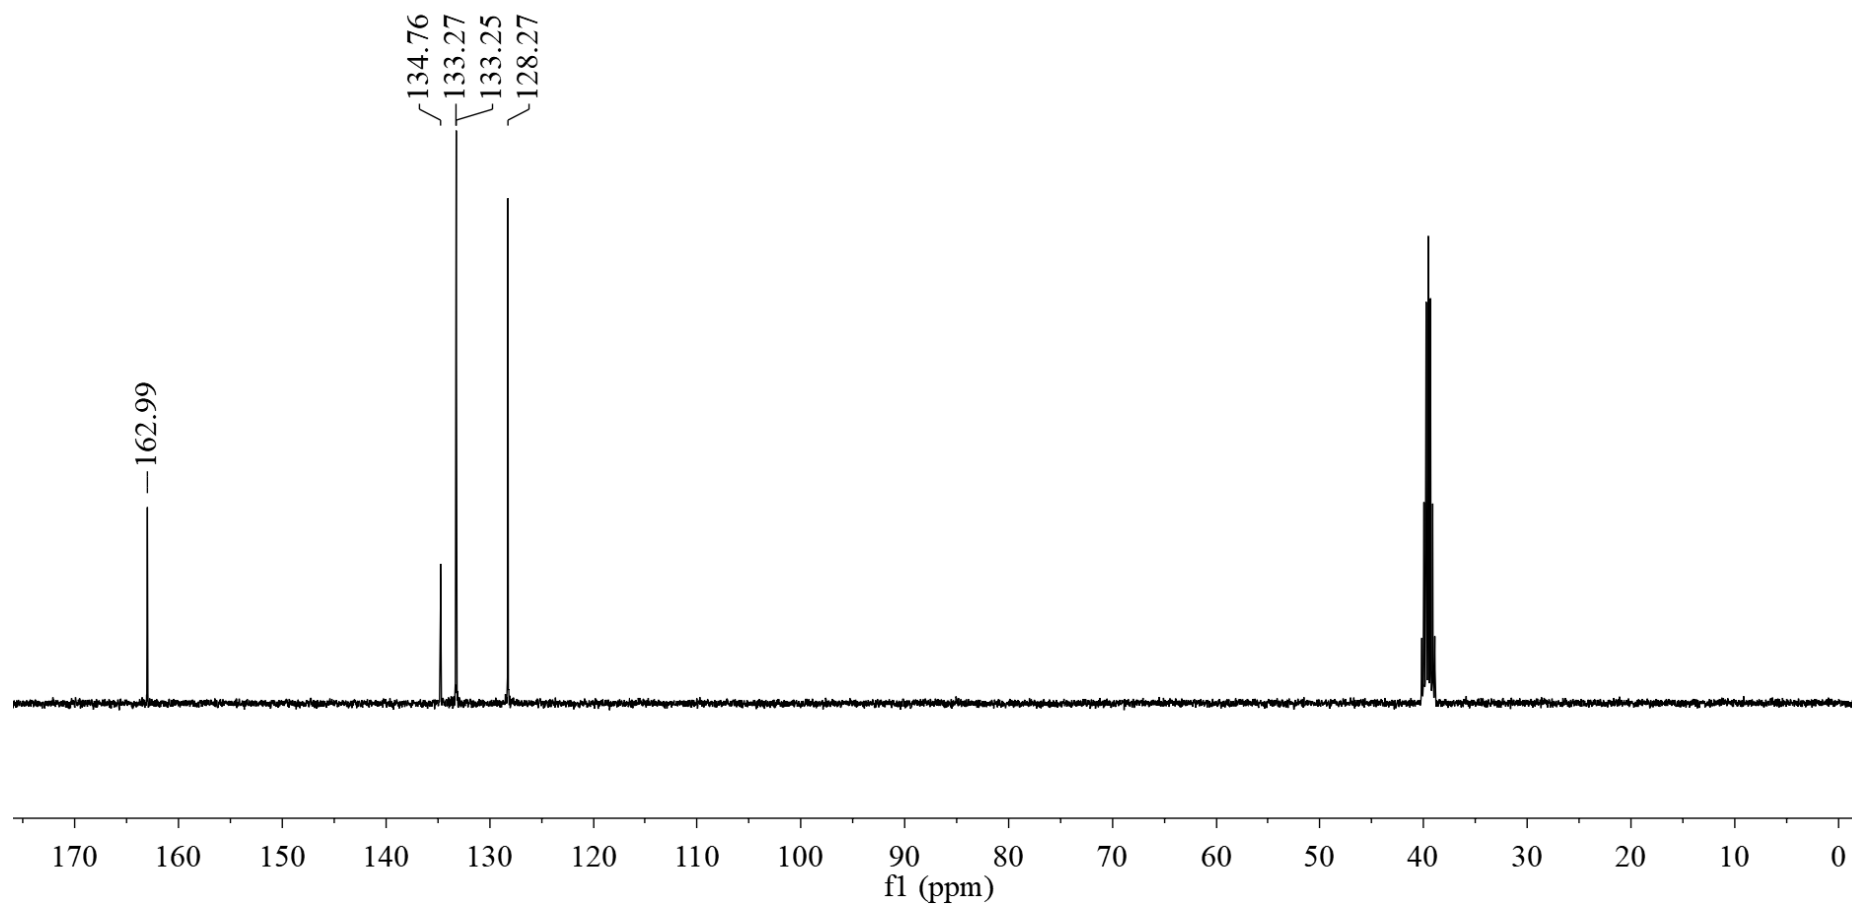



$^1\text{H}$  NMR (400 MHz,  $\text{DMSO-}d_6$ ) spectrum of **2ac**

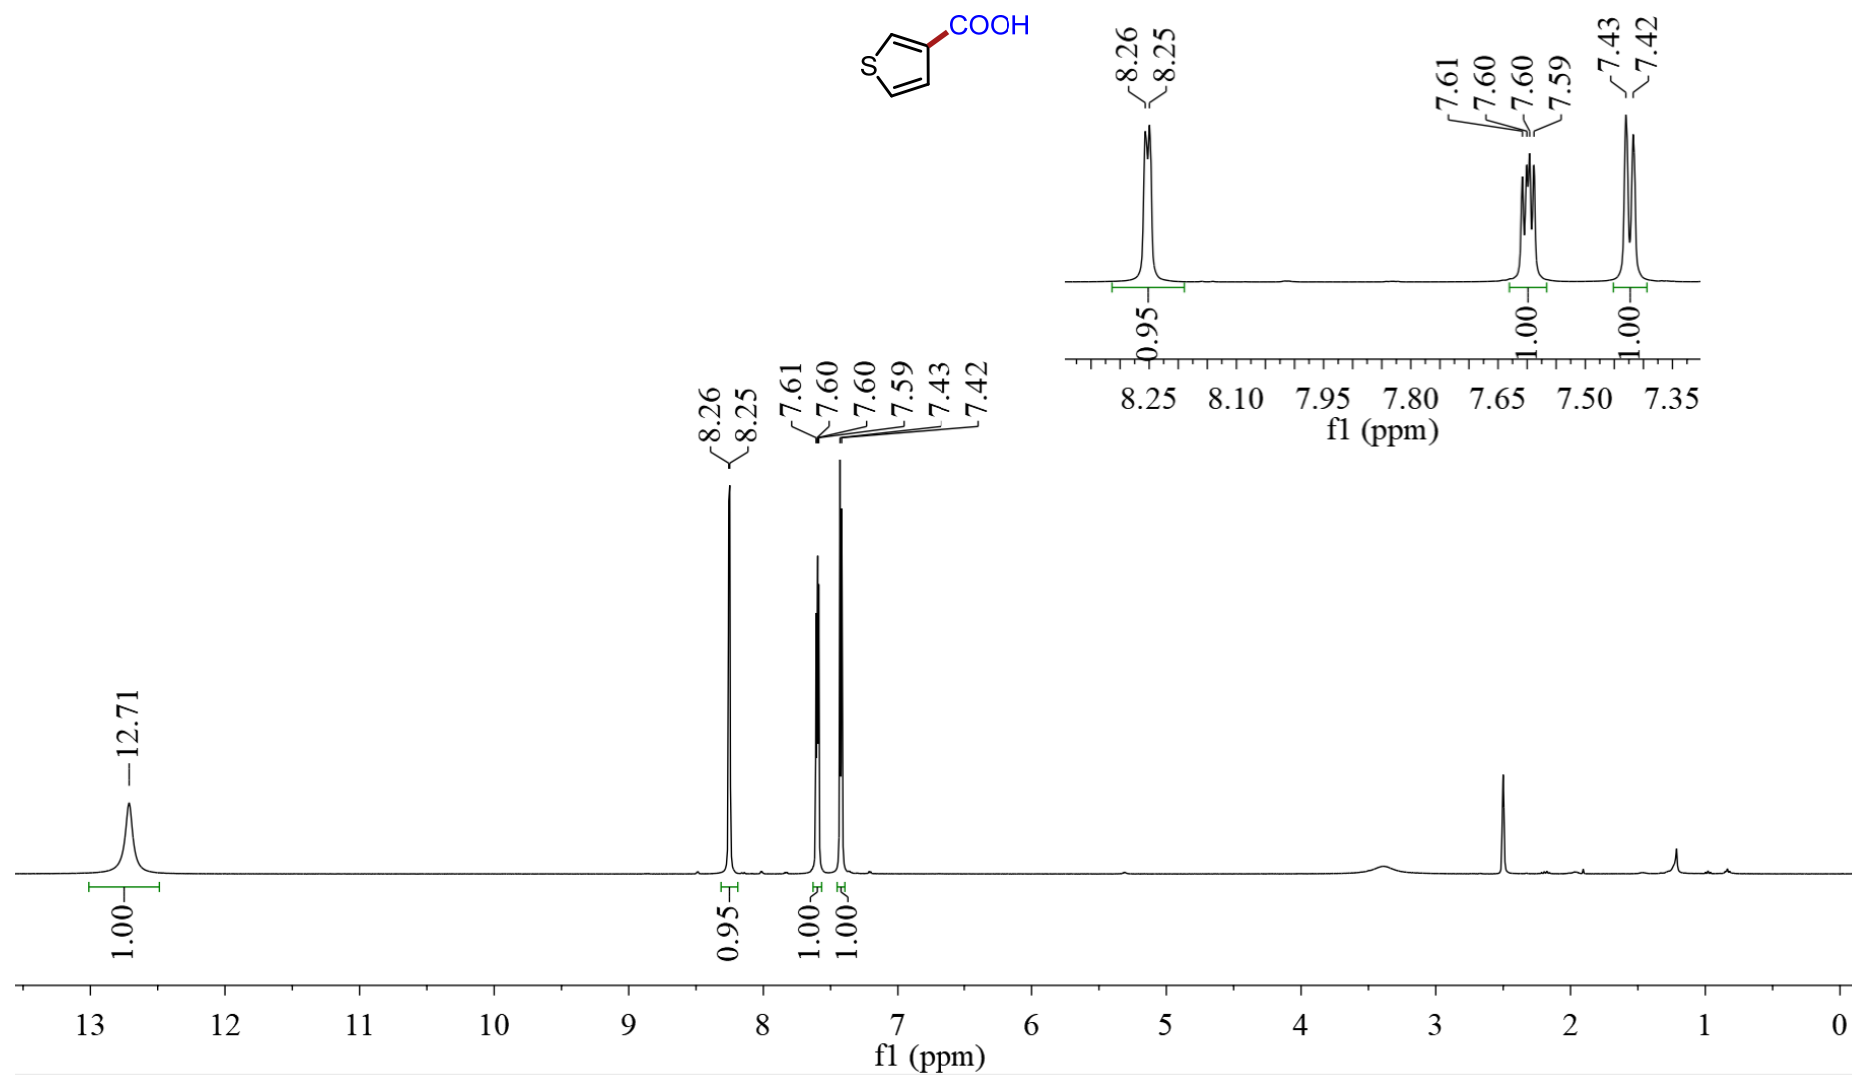

$^{13}\text{C}$  NMR (101 MHz,  $\text{DMSO-}d_6$ ) spectrum of **2ac**

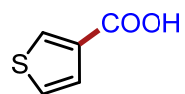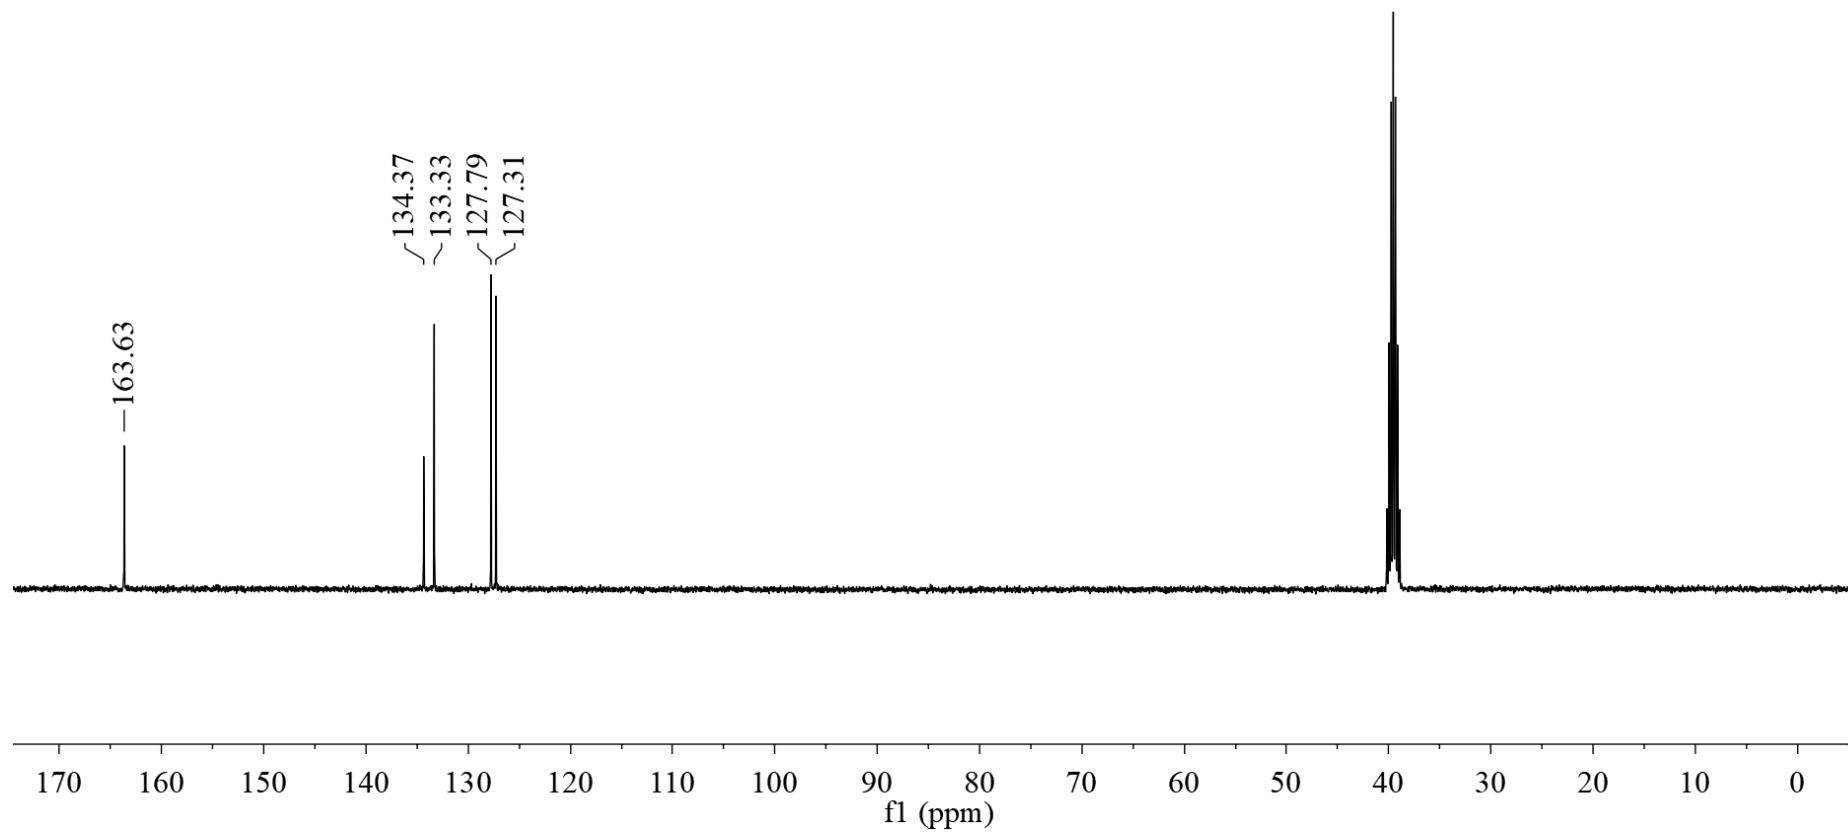

$^1\text{H}$  NMR (400 MHz,  $\text{DMSO-}d_6$ ) spectrum of **2ad**

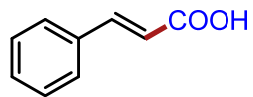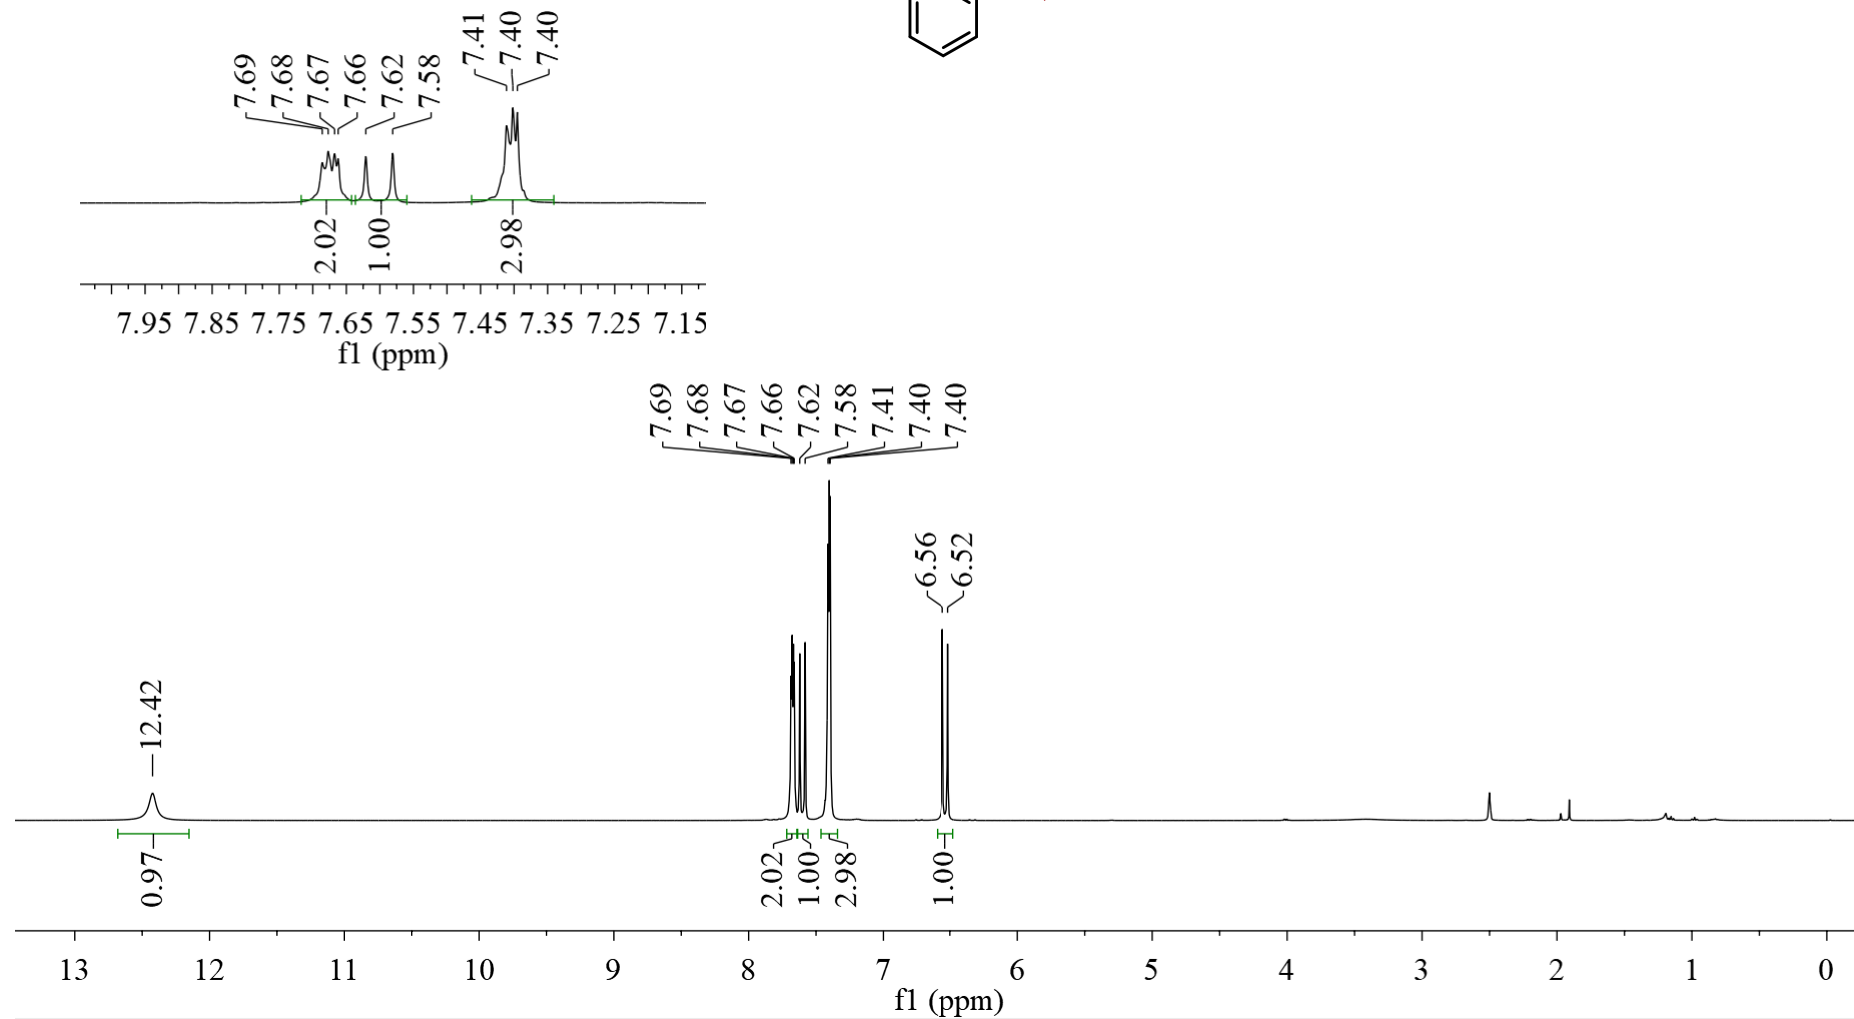

$^{13}\text{C}$  NMR (101 MHz,  $\text{DMSO-}d_6$ ) spectrum of **2ad**

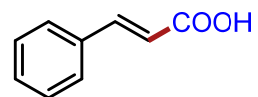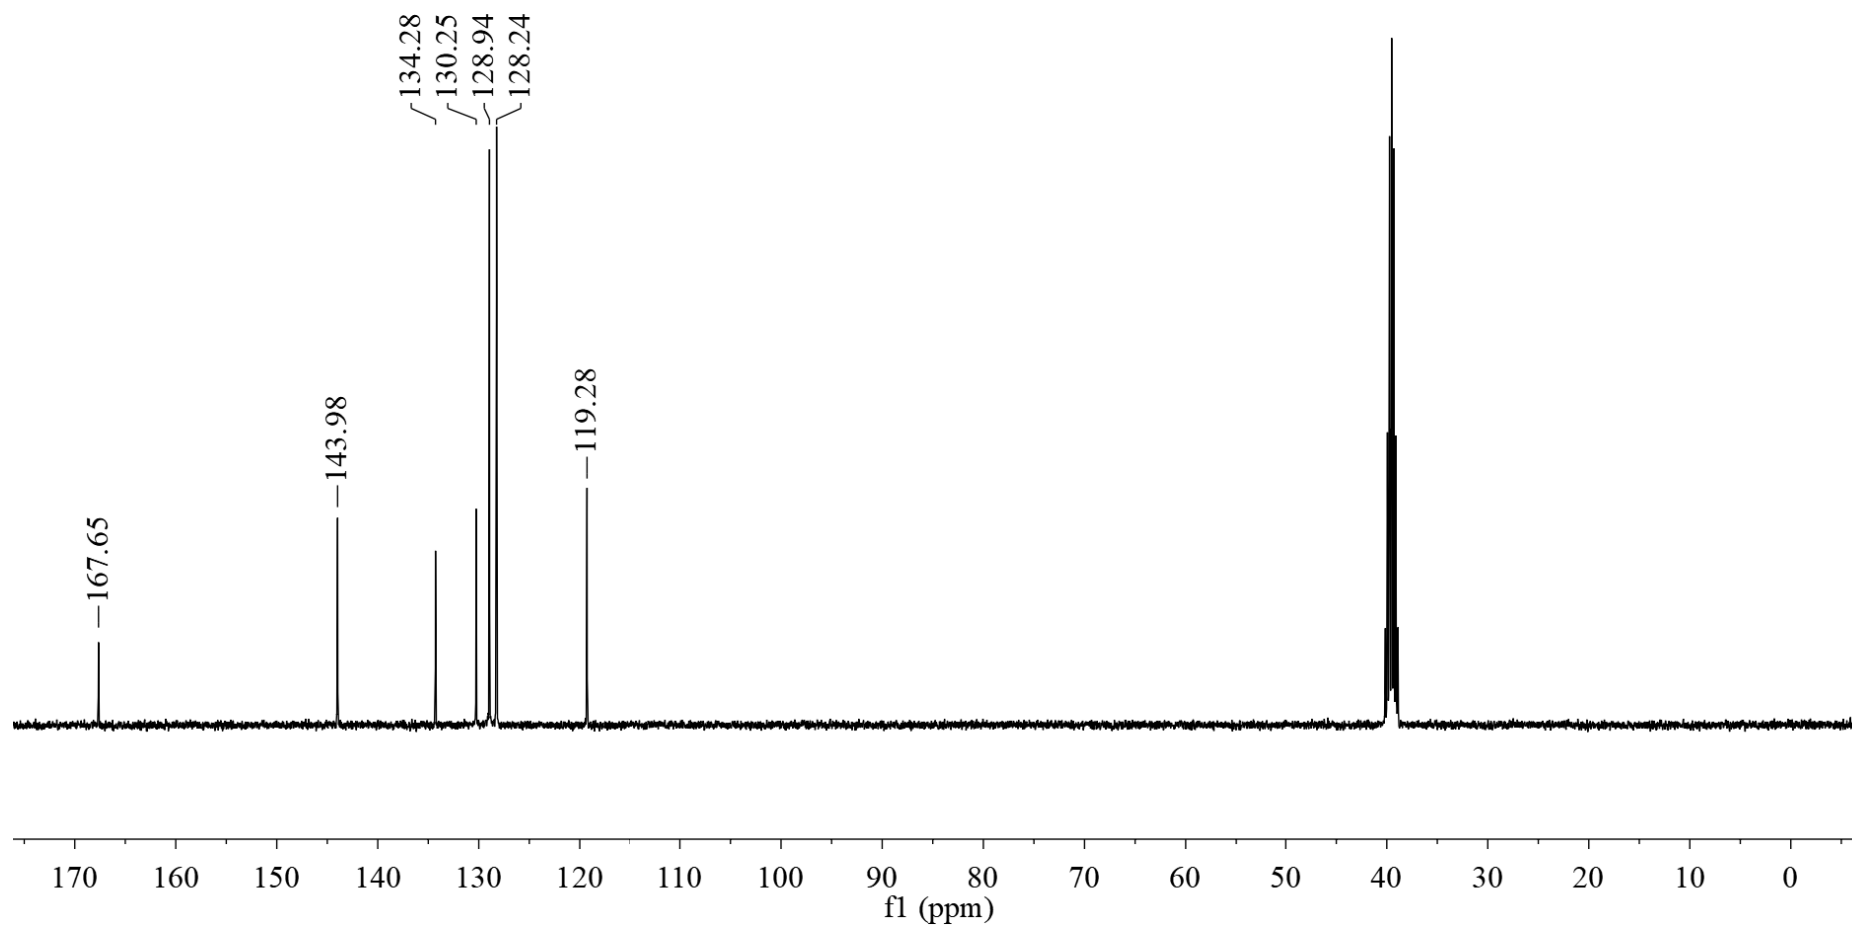

$^1\text{H}$  NMR (400 MHz,  $\text{DMSO-}d_6$ ) spectrum of **2ae**

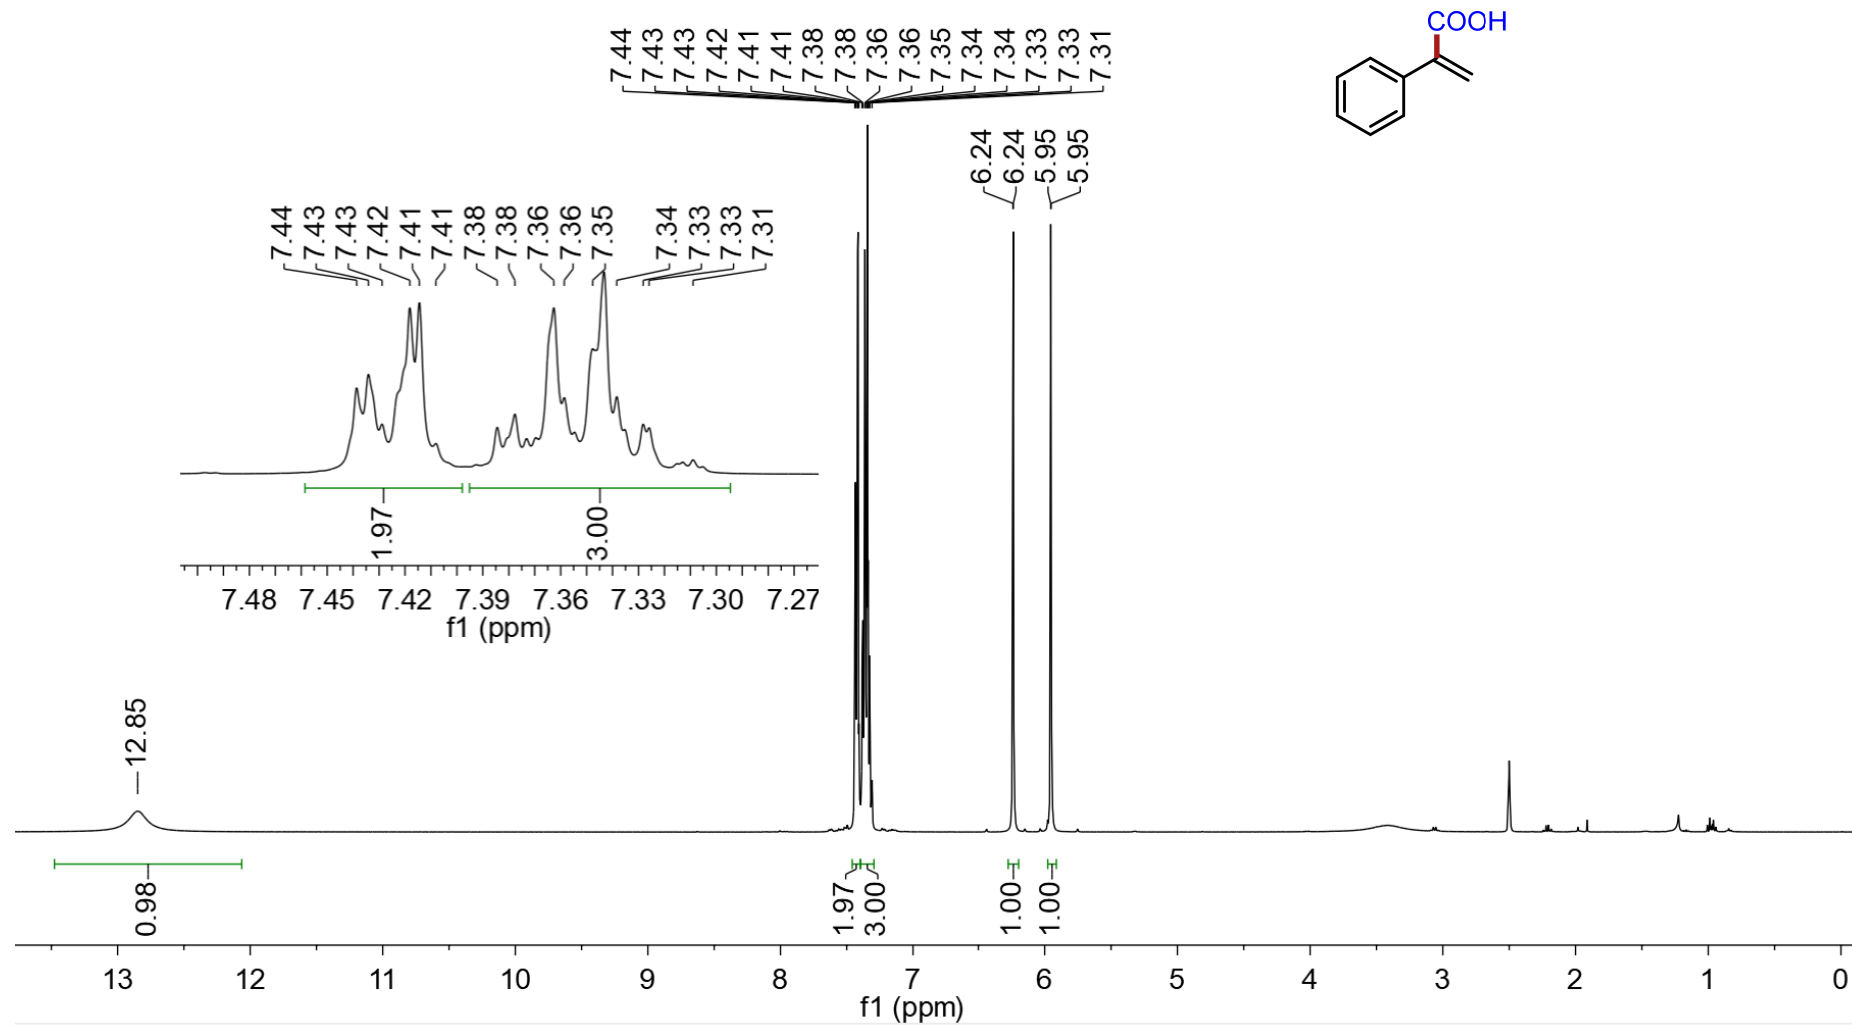

$^{13}\text{C}$  NMR (101 MHz,  $\text{DMSO-}d_6$ ) spectrum of **2ae**

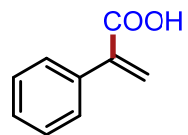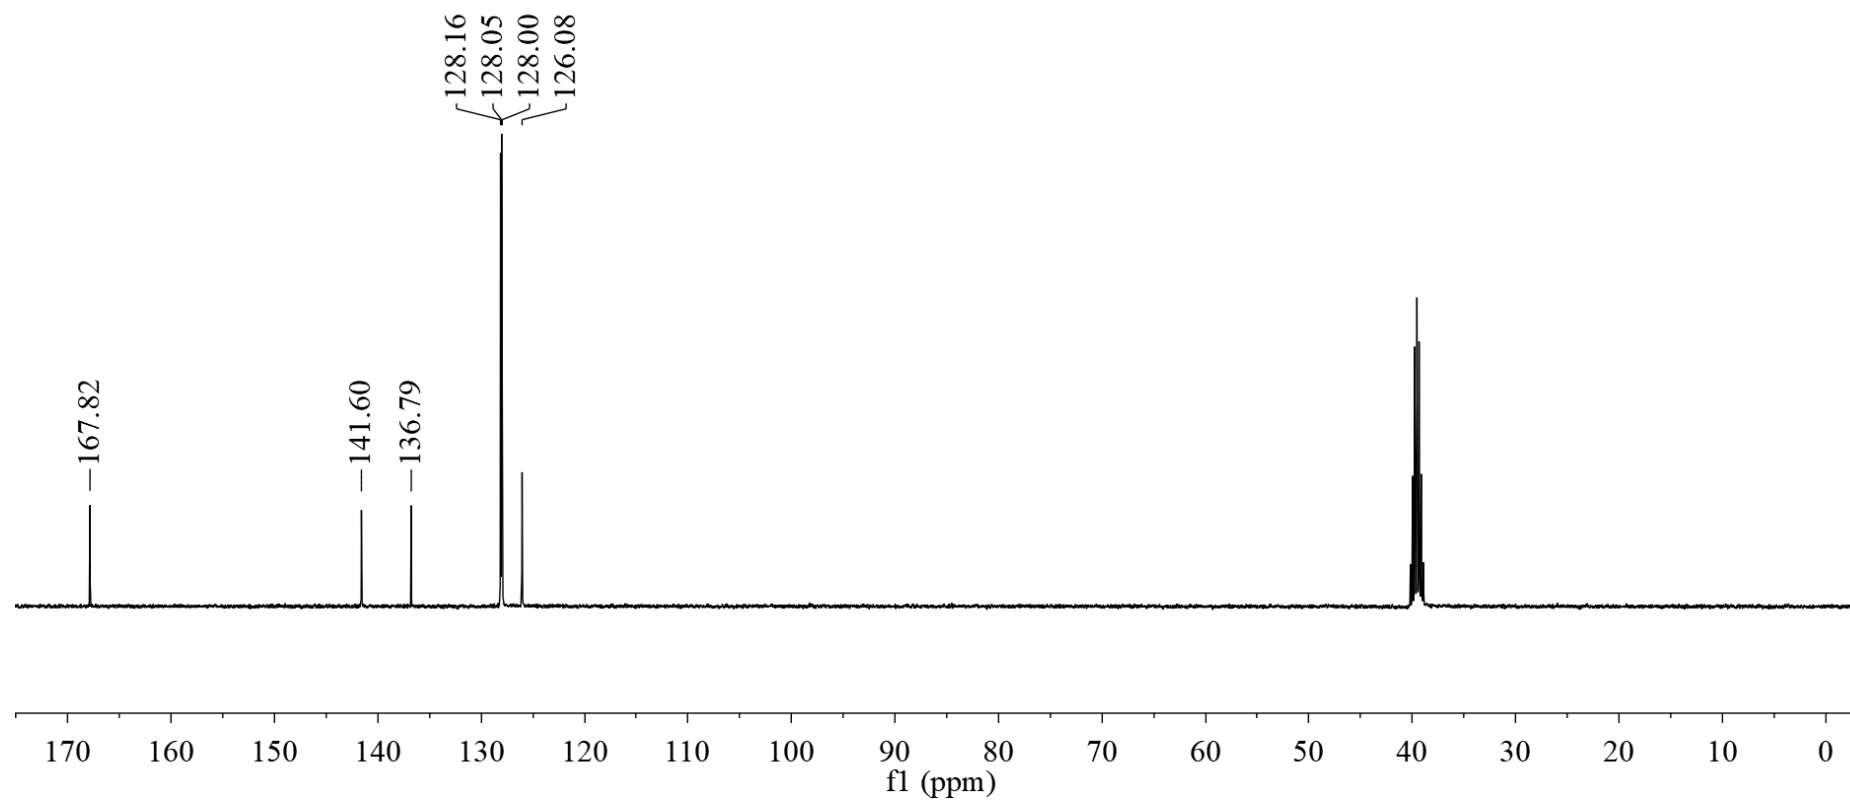

$^1\text{H}$  NMR (400 MHz,  $\text{DMSO-}d_6$ ) spectrum of **2af**

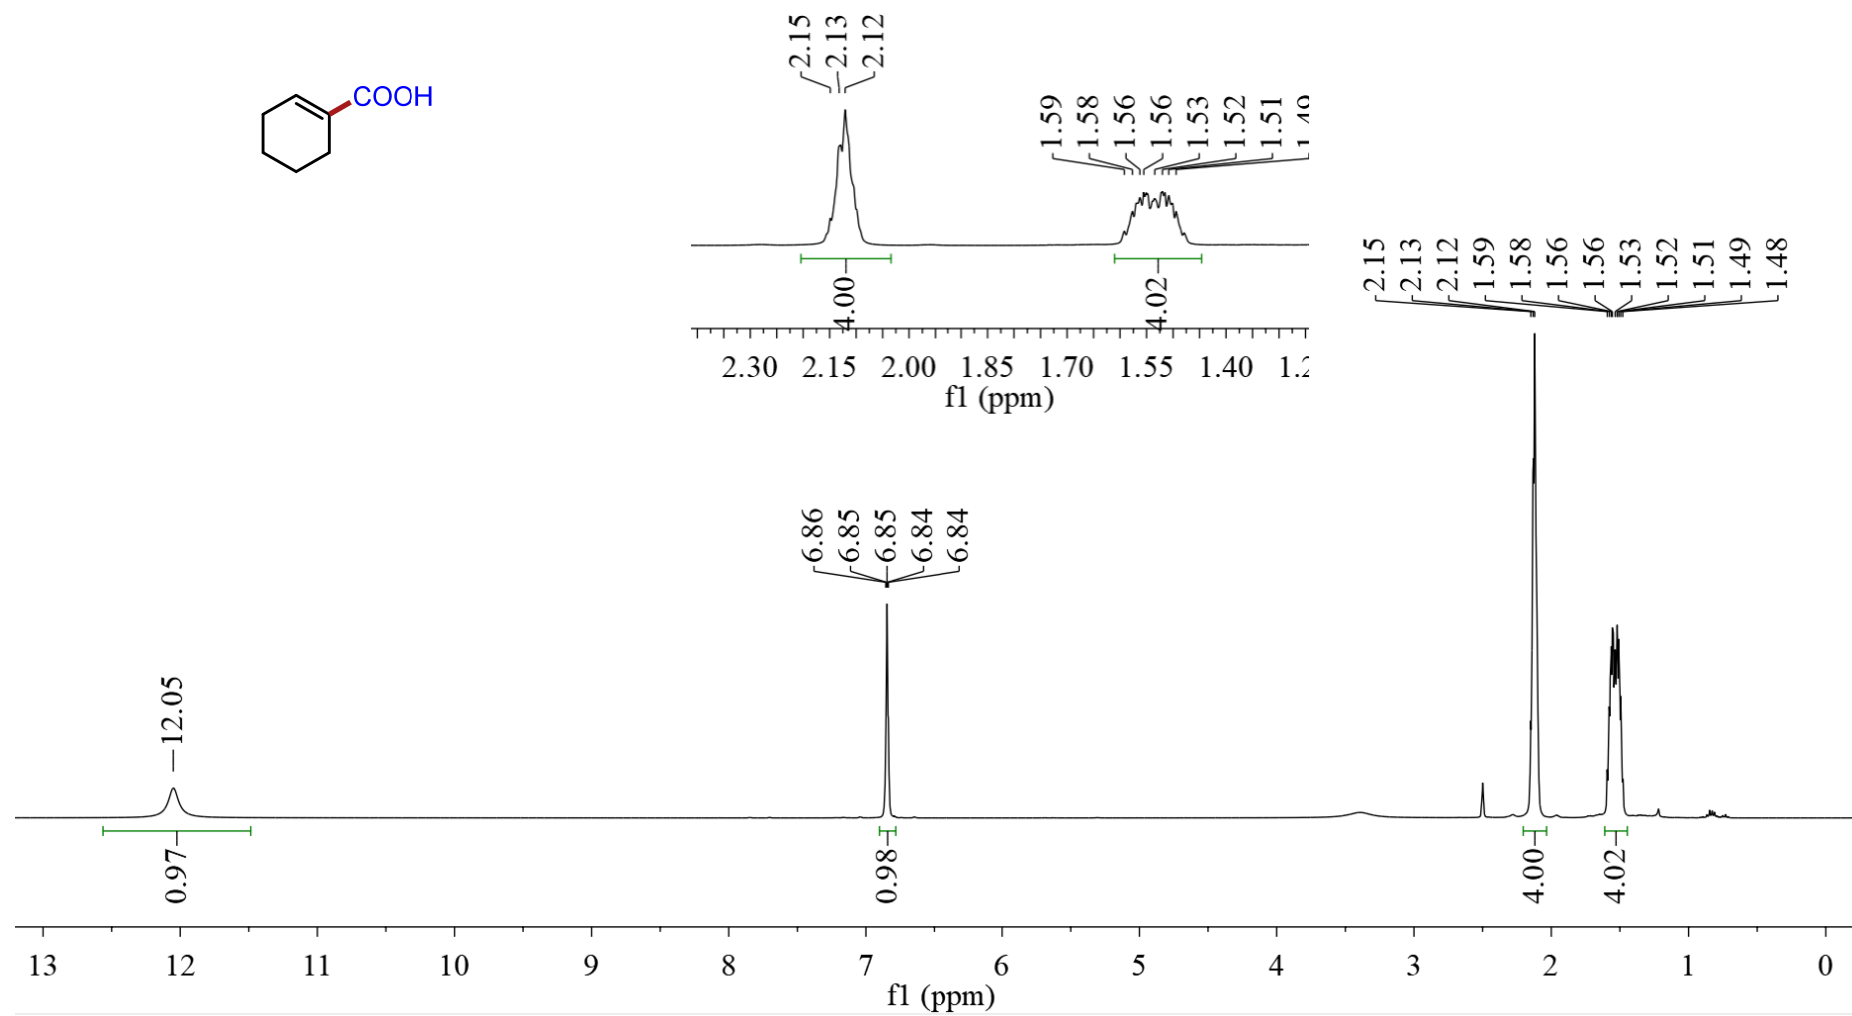

$^{13}\text{C}$  NMR (101 MHz,  $\text{DMSO-}d_6$ ) spectrum of **2af**

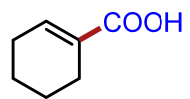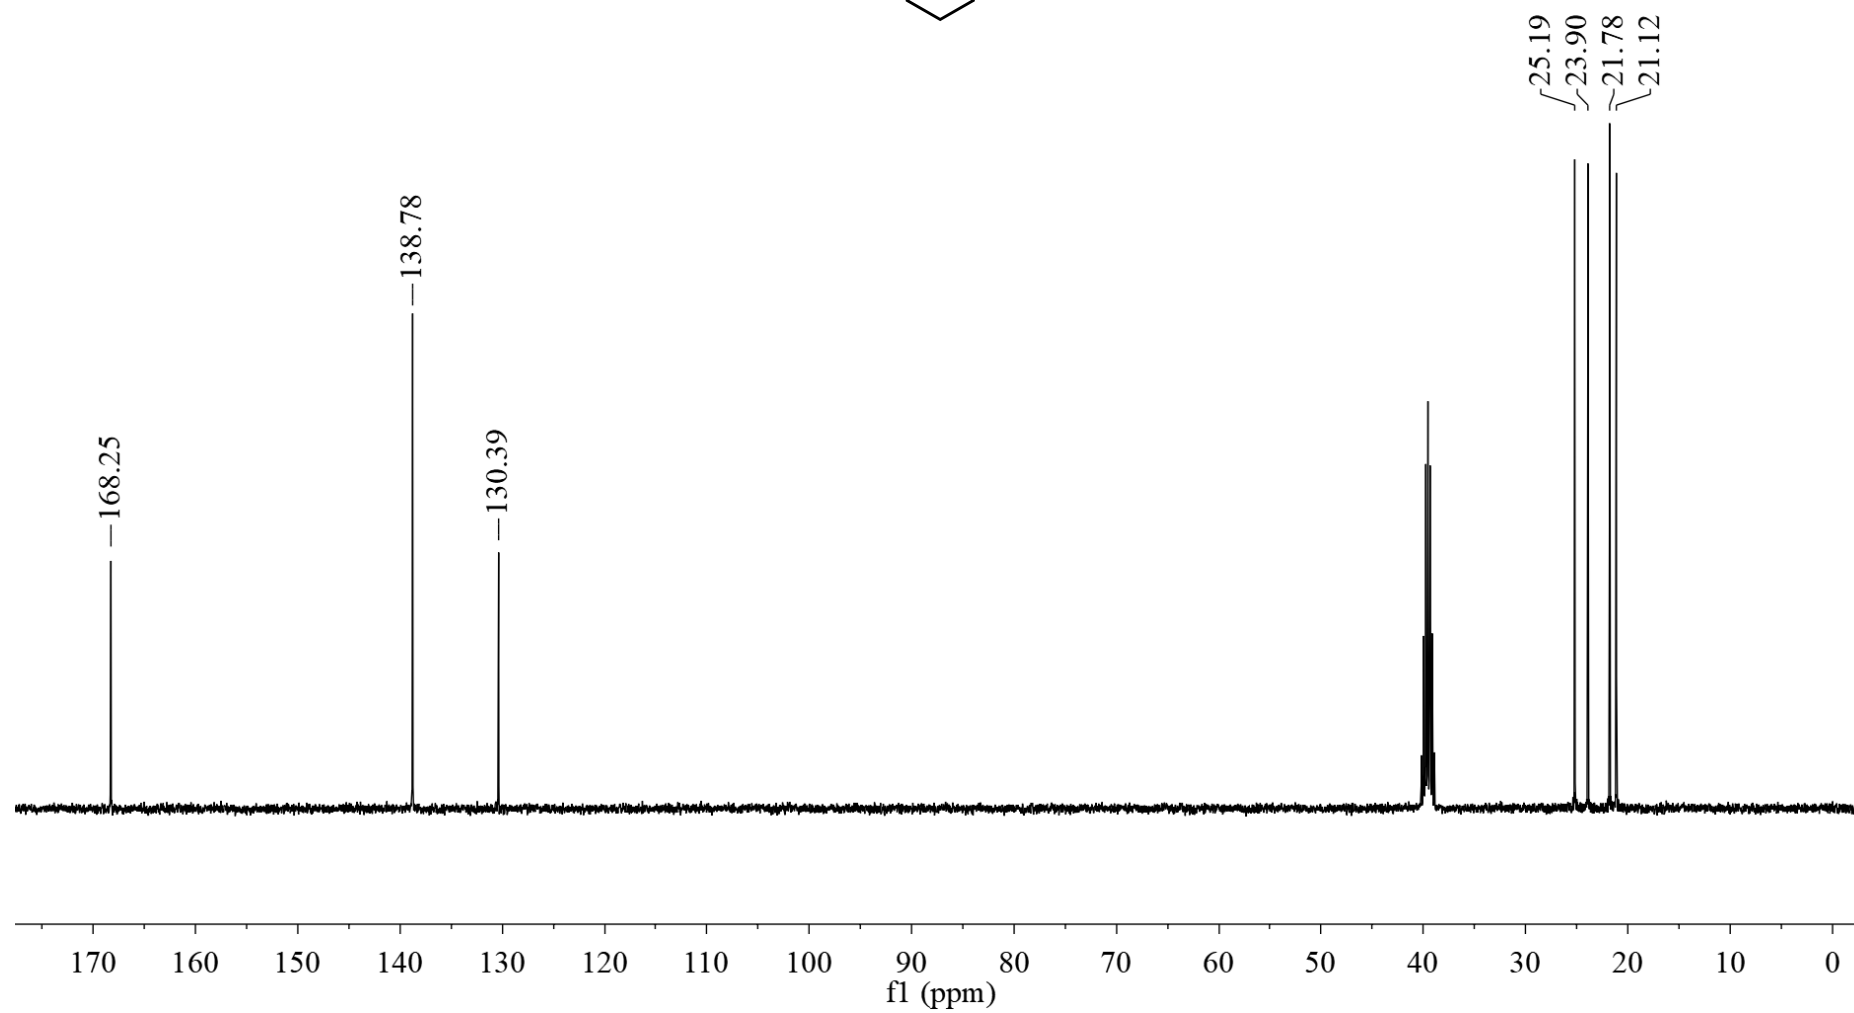



$^1\text{H}$  NMR (400 MHz,  $\text{DMSO-}d_6$ ) spectrum of **2ag**

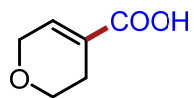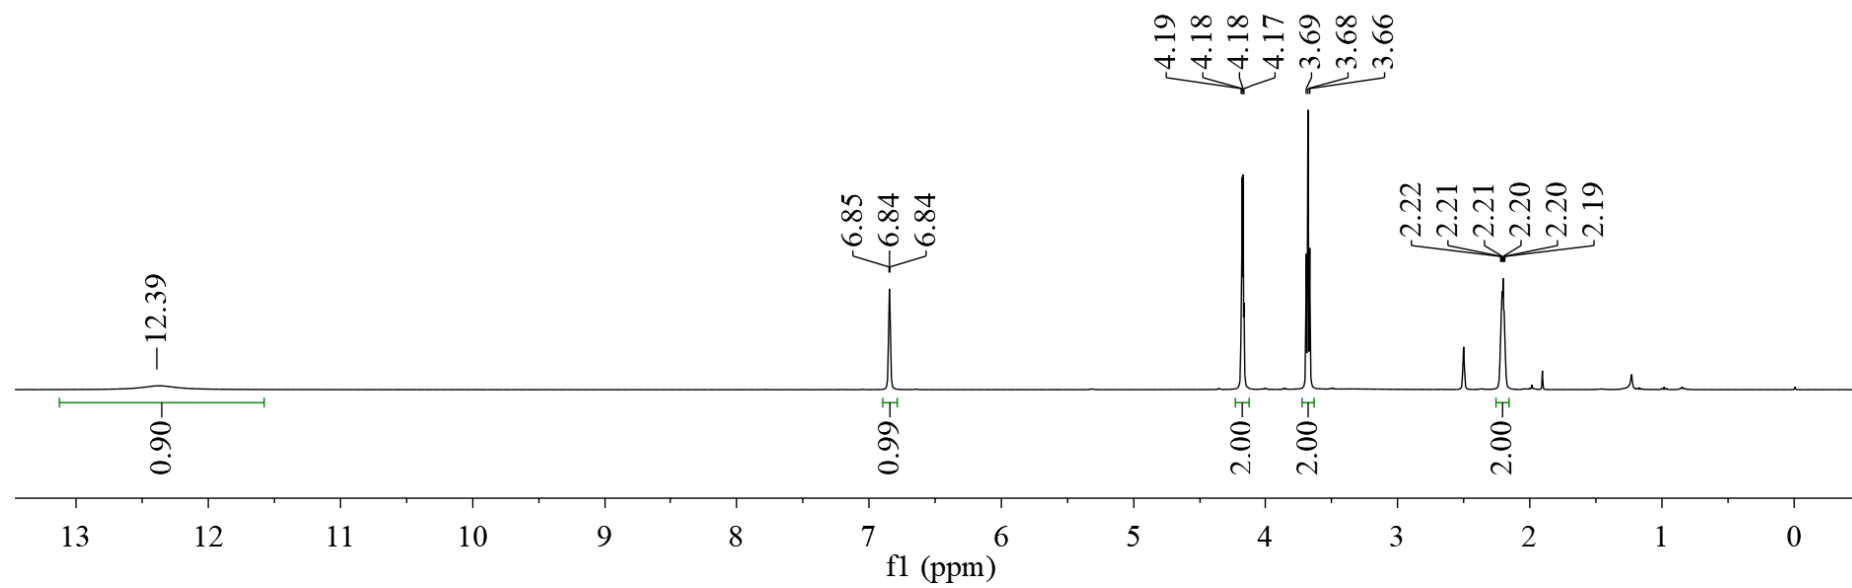

$^{13}\text{C}$  NMR (101 MHz,  $\text{DMSO-}d_6$ ) spectrum of **2ag**

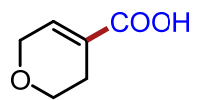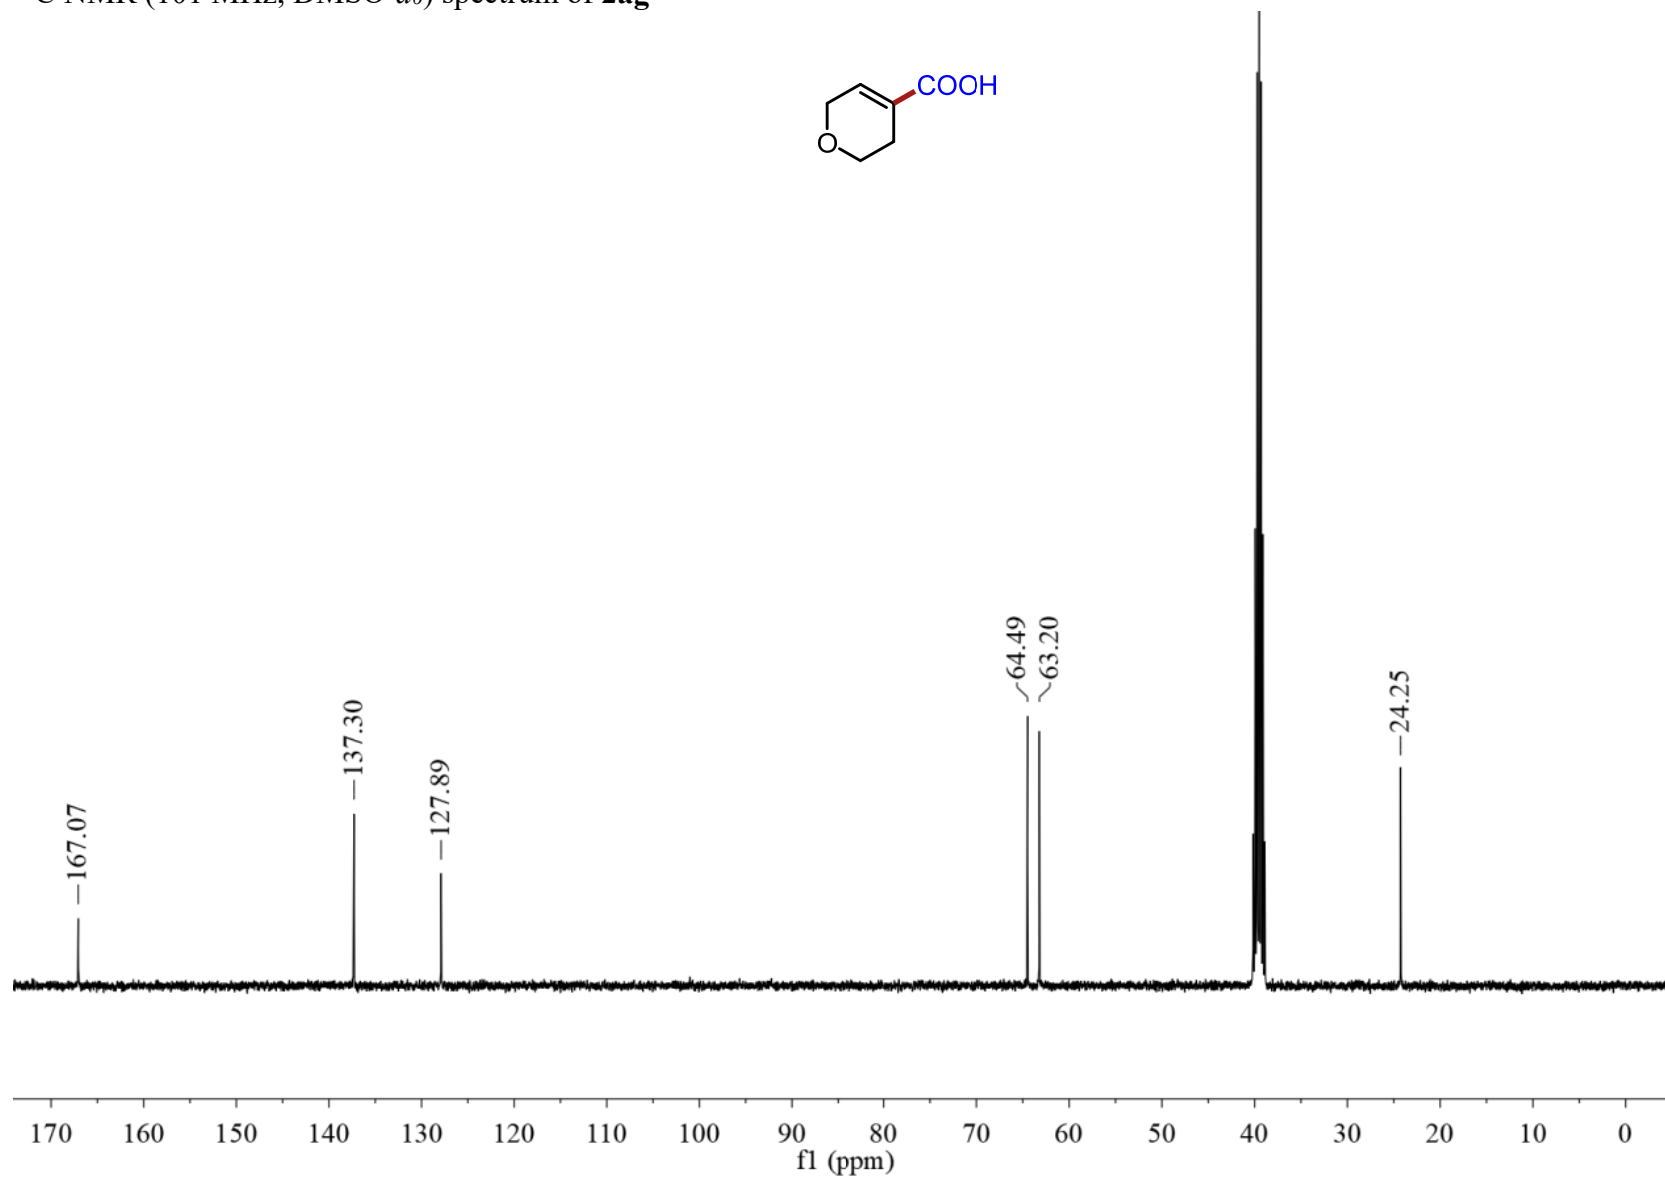

$^1\text{H}$  NMR (400 MHz,  $\text{DMSO-}d_6$ ) spectrum of **2ah**

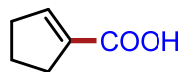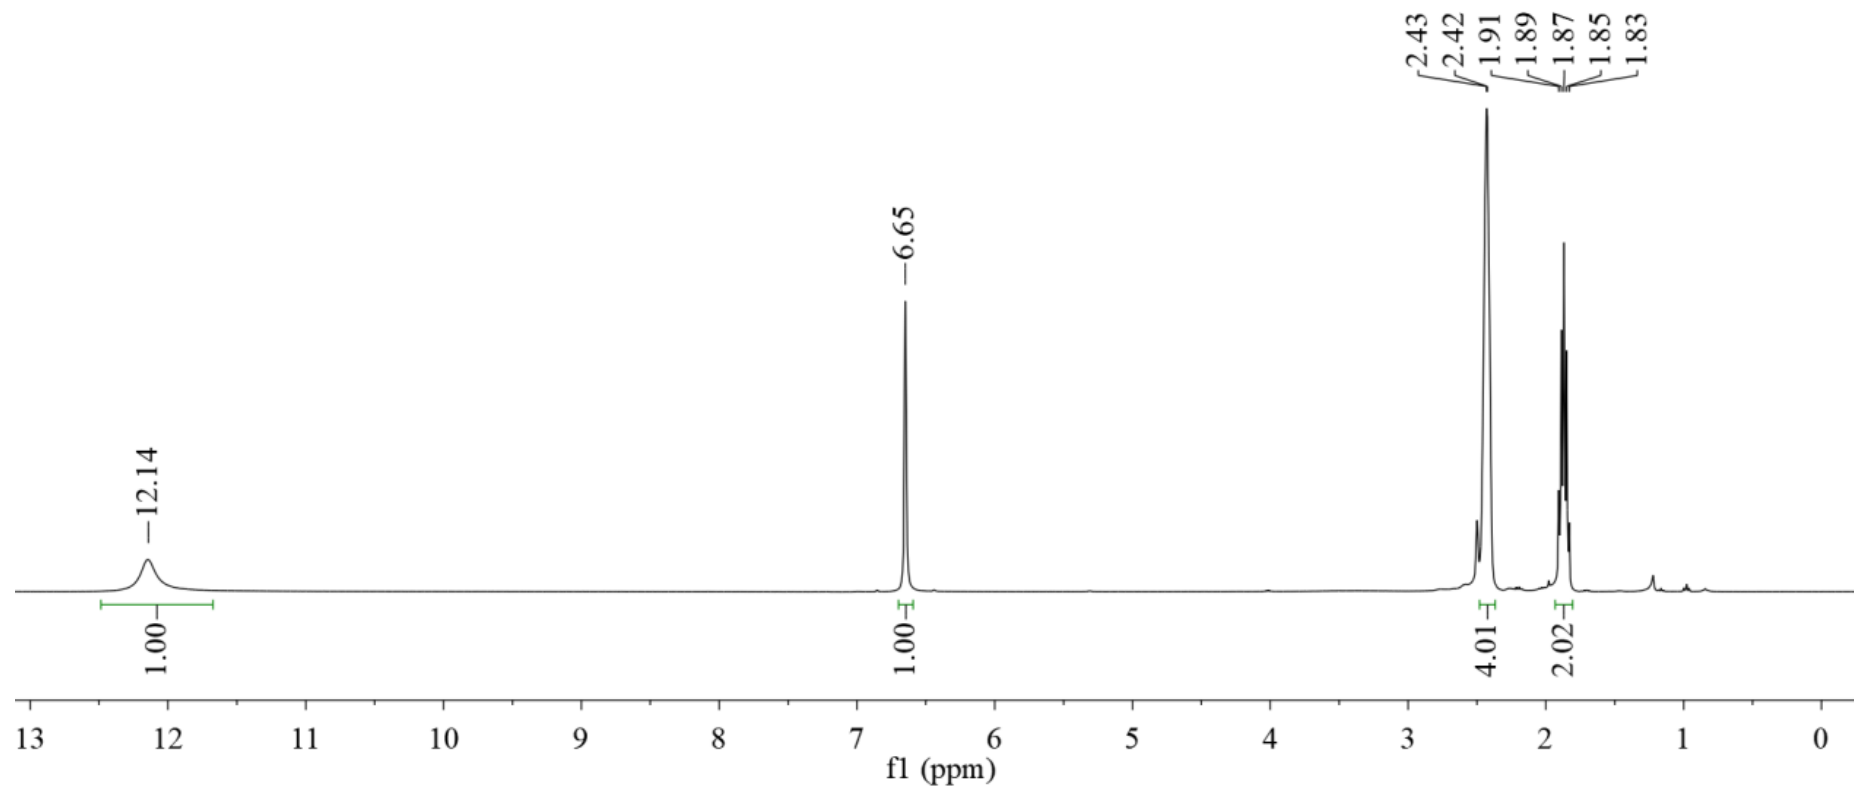

$^{13}\text{C}$  NMR (101 MHz,  $\text{DMSO-}d_6$ ) spectrum of **2ah**

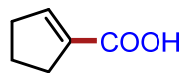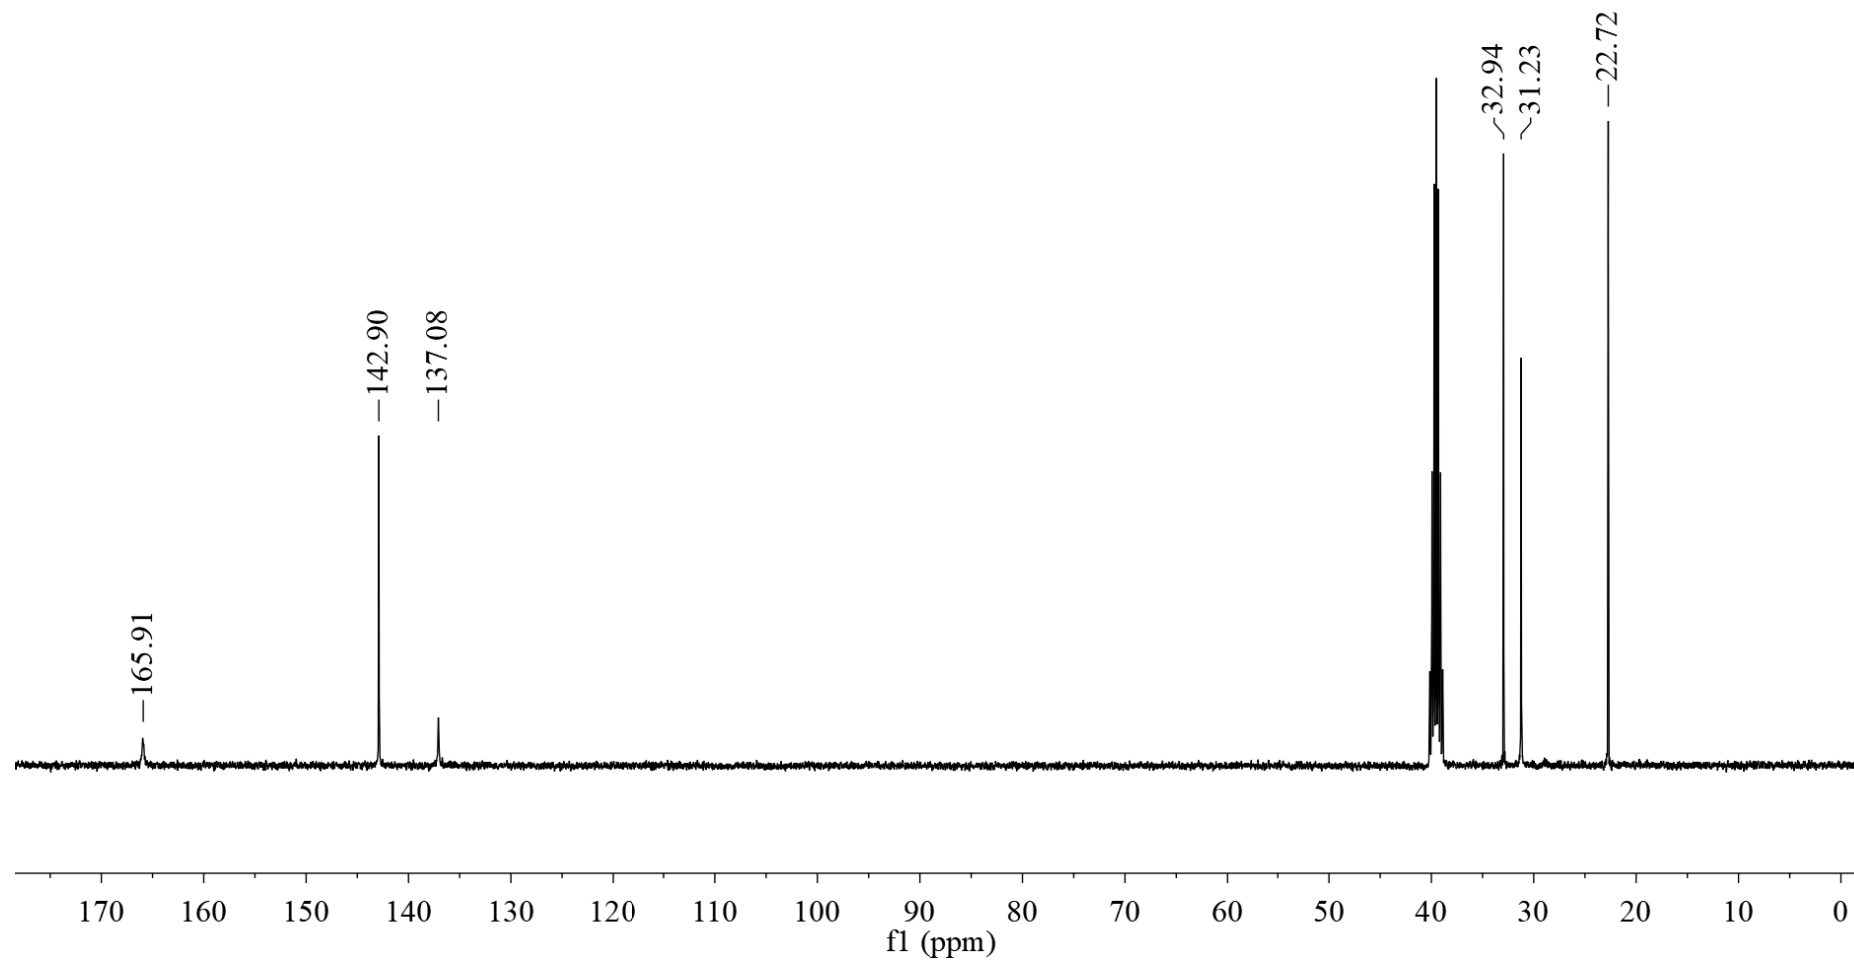

$^1\text{H}$  NMR (400 MHz,  $\text{DMSO-}d_6$ ) spectrum of **2ai**

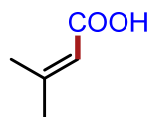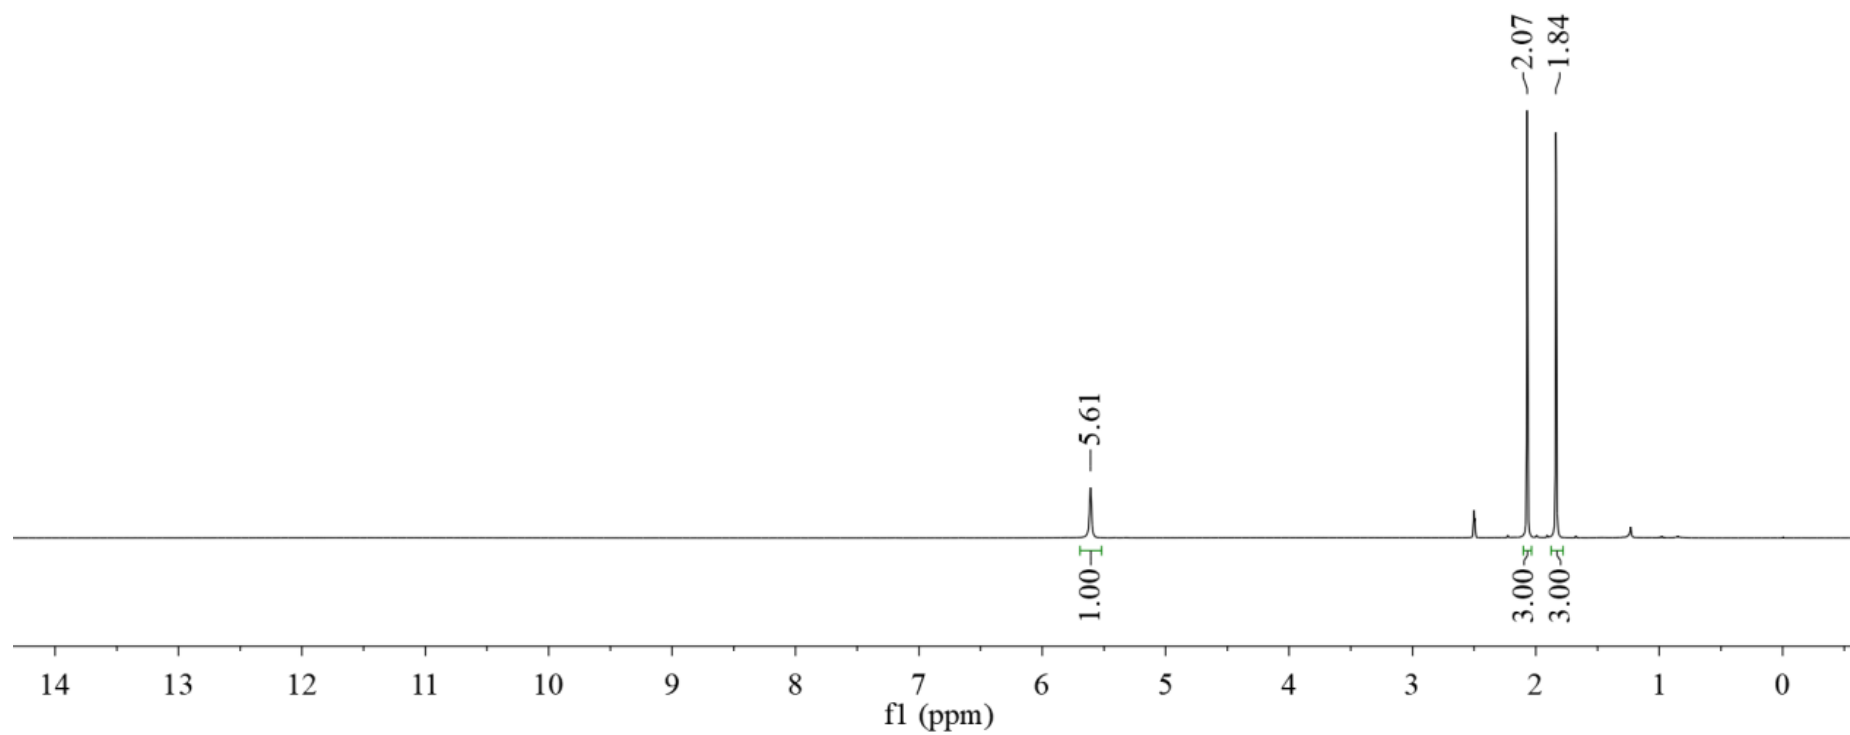

$^{13}\text{C}$  NMR (101 MHz,  $\text{DMSO-}d_6$ ) spectrum of **2ai**

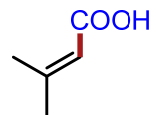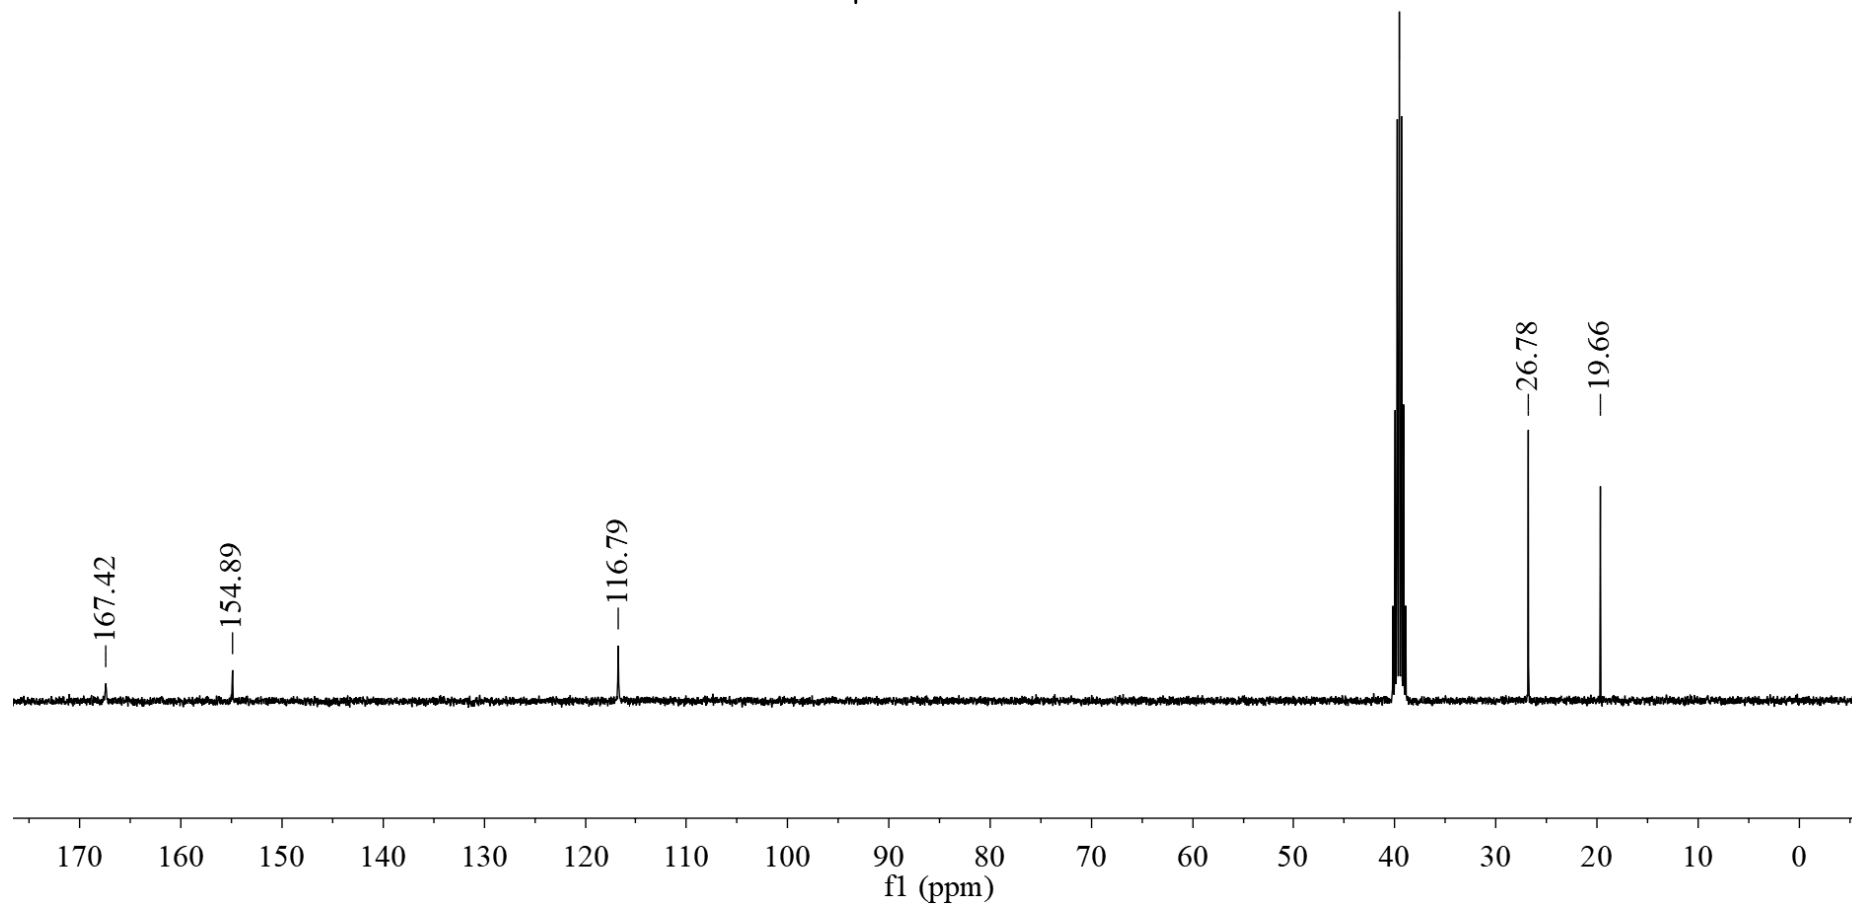

$^1\text{H}$  NMR (400 MHz,  $\text{DMSO-}d_6$ ) spectrum of **2aj**

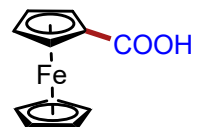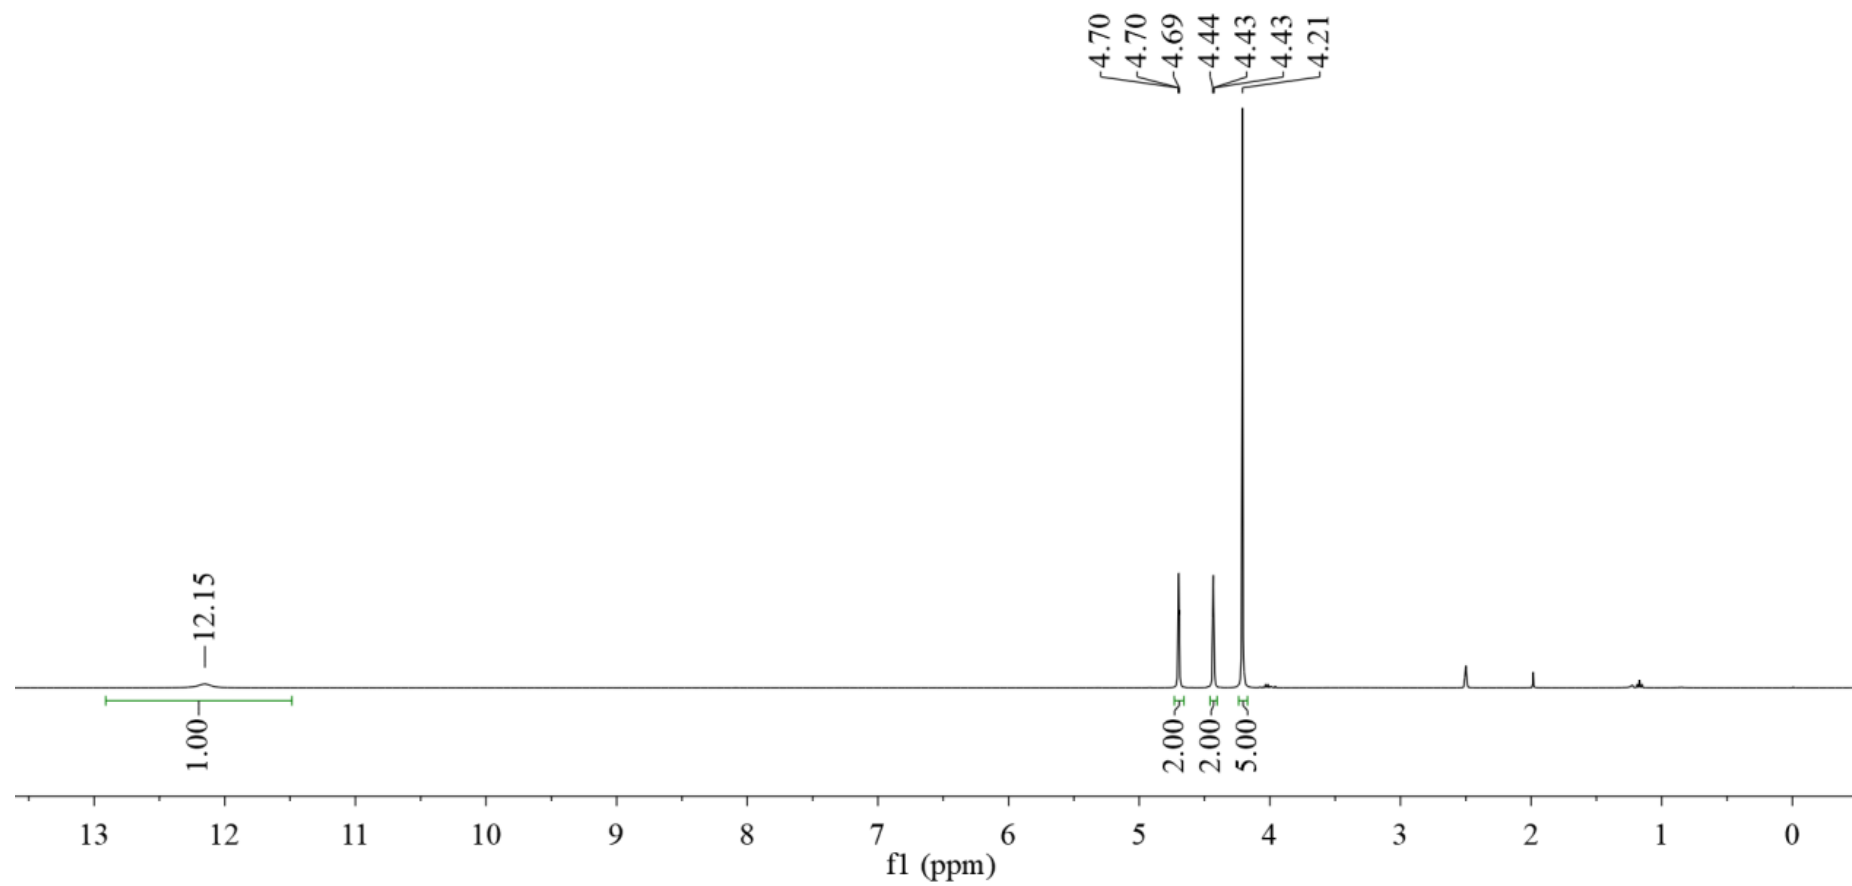

$^{13}\text{C}$  NMR (101 MHz,  $\text{DMSO-}d_6$ ) spectrum of **2aj**

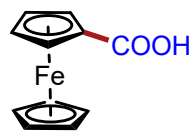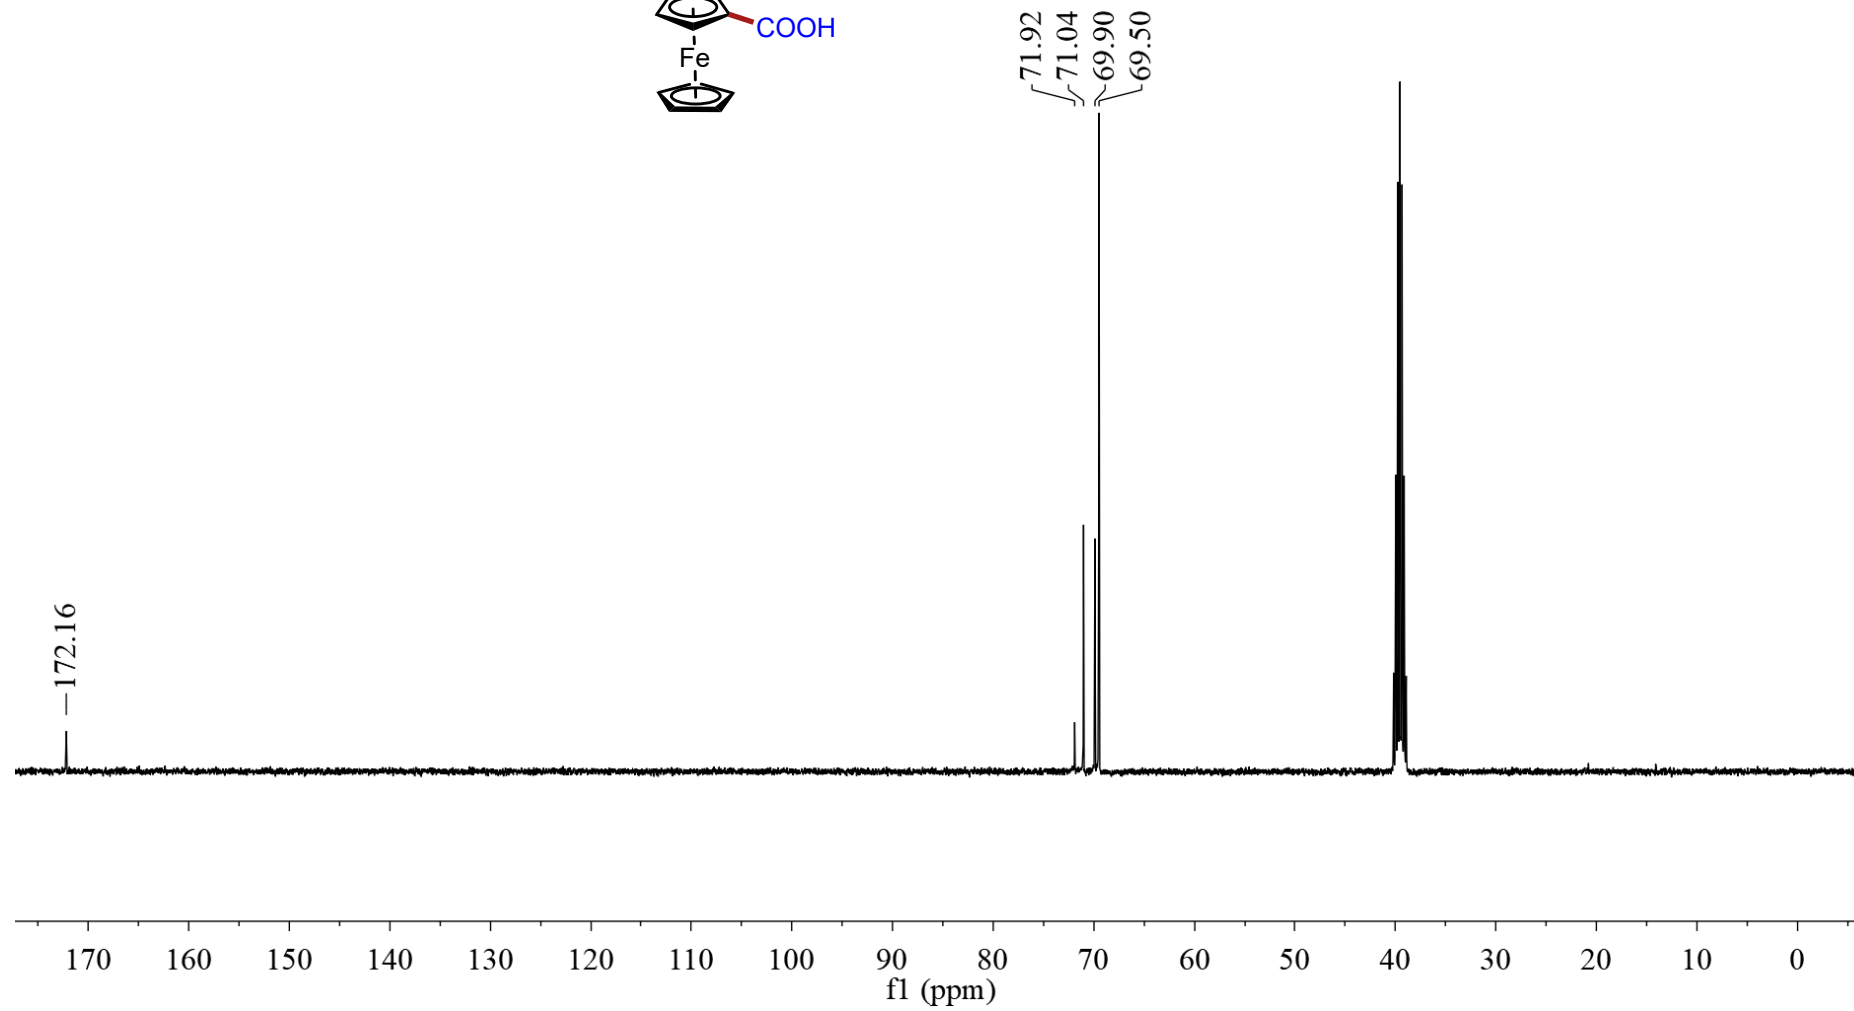



<sup>1</sup>H NMR (400 MHz, DMSO-*d*<sub>6</sub>) spectrum of **3**

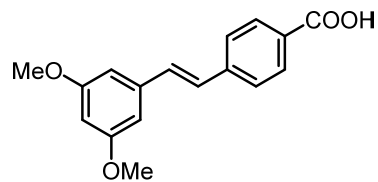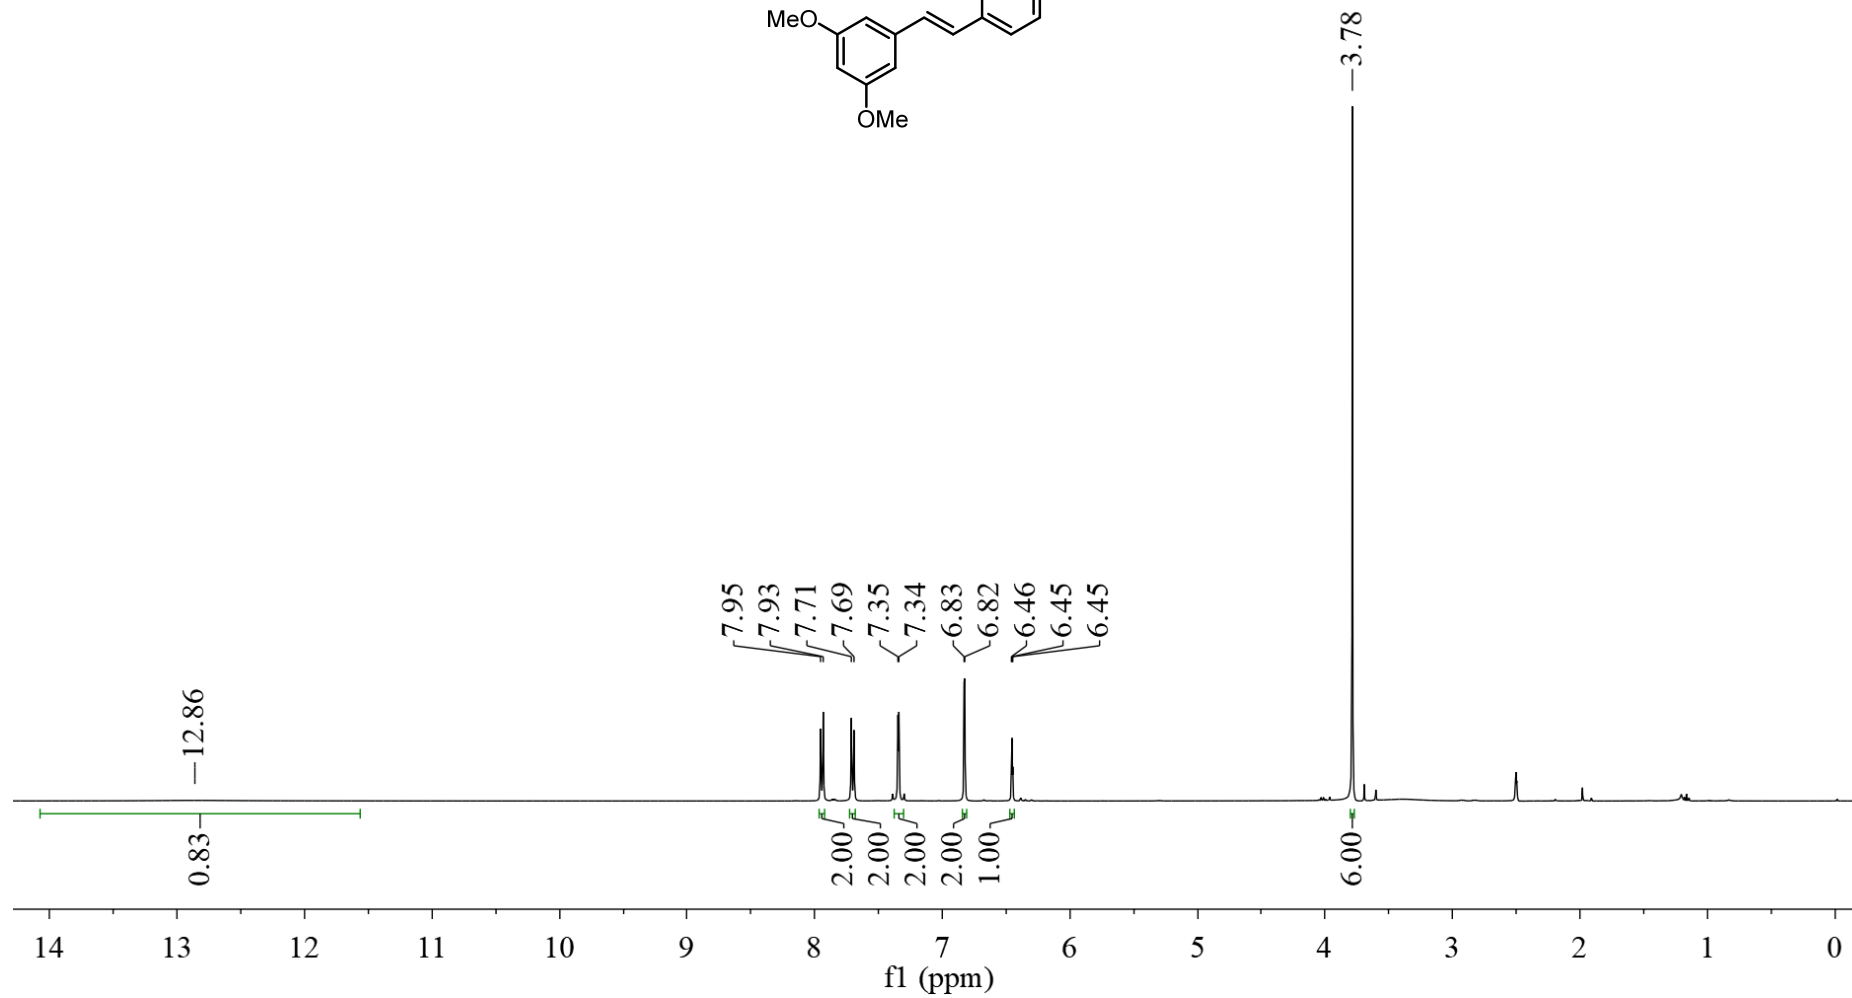

$^{13}\text{C}$  NMR (101 MHz,  $\text{DMSO-}d_6$ ) spectrum of **3**

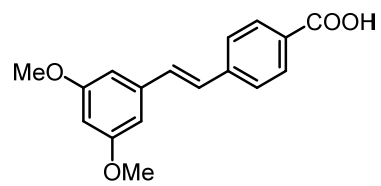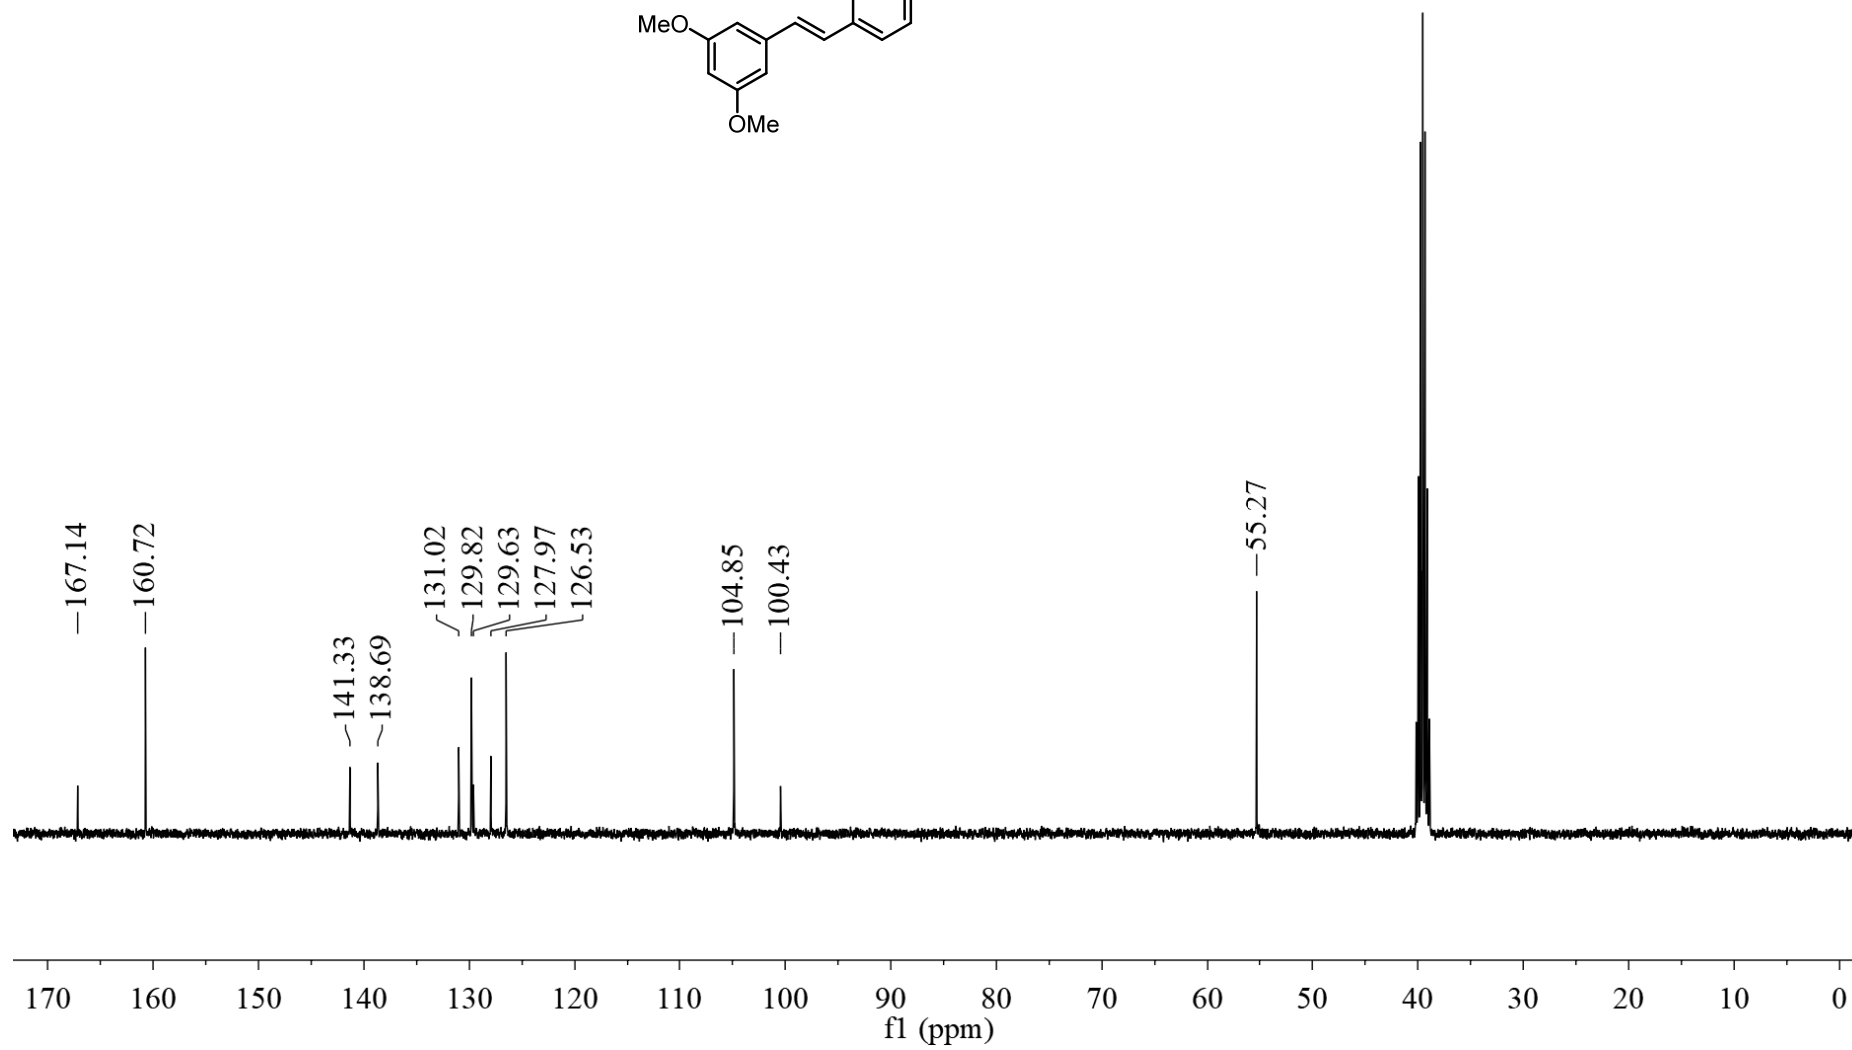

$^1\text{H}$  NMR (400 MHz,  $\text{DMSO-}d_6$ ) spectrum of **4**

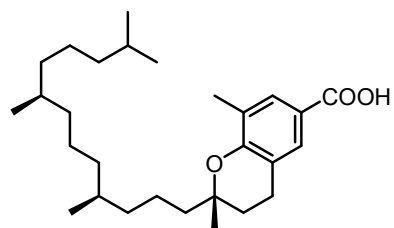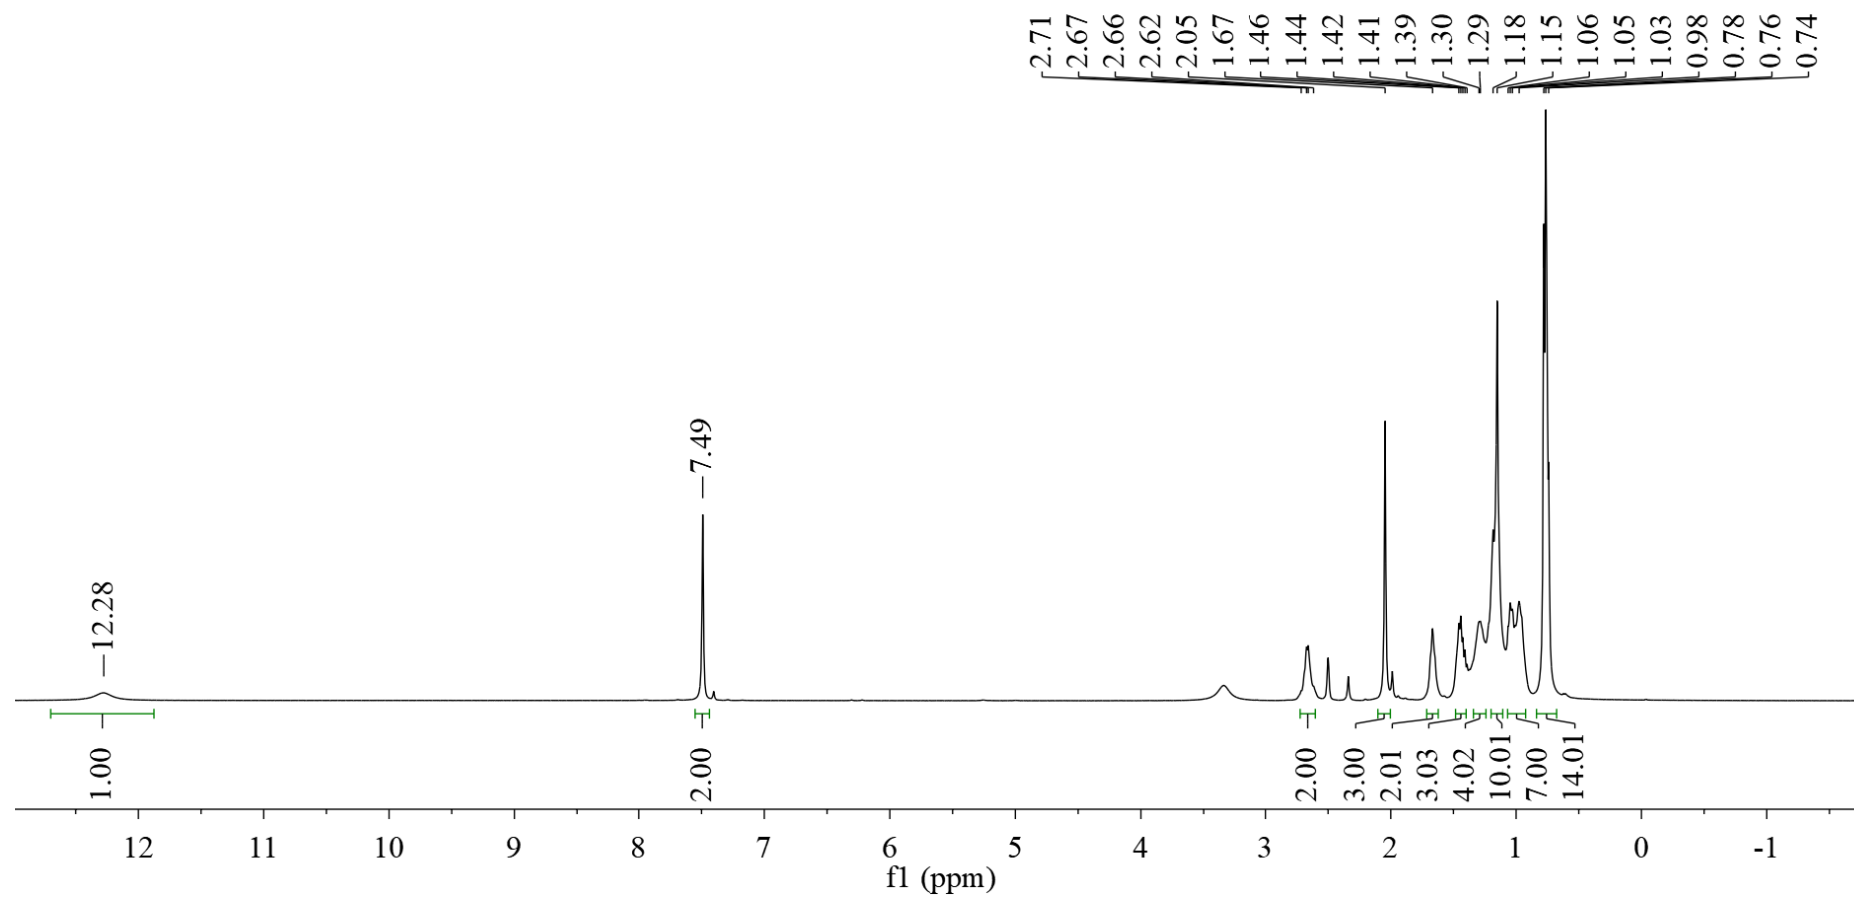

$^{13}\text{C}$  NMR (101 MHz,  $\text{DMSO-}d_6$ ) spectrum of 4

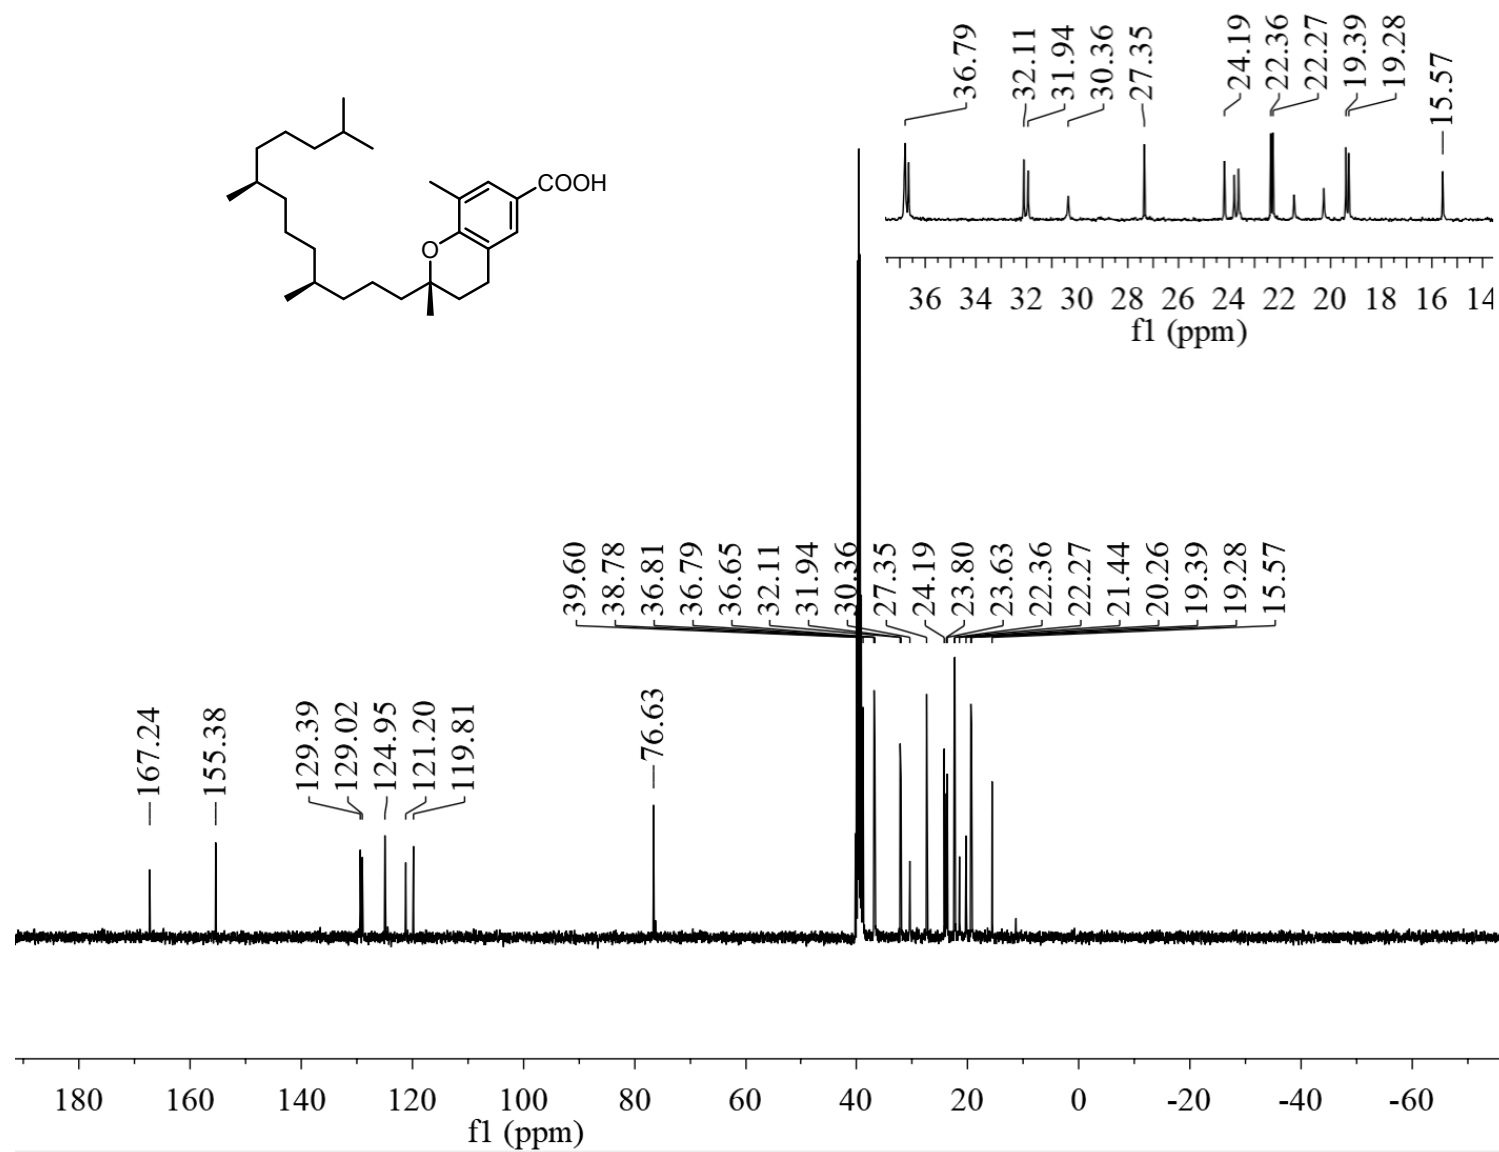

$^1\text{H}$  NMR (400 MHz,  $\text{CDCl}_3$ ) spectrum of **5**

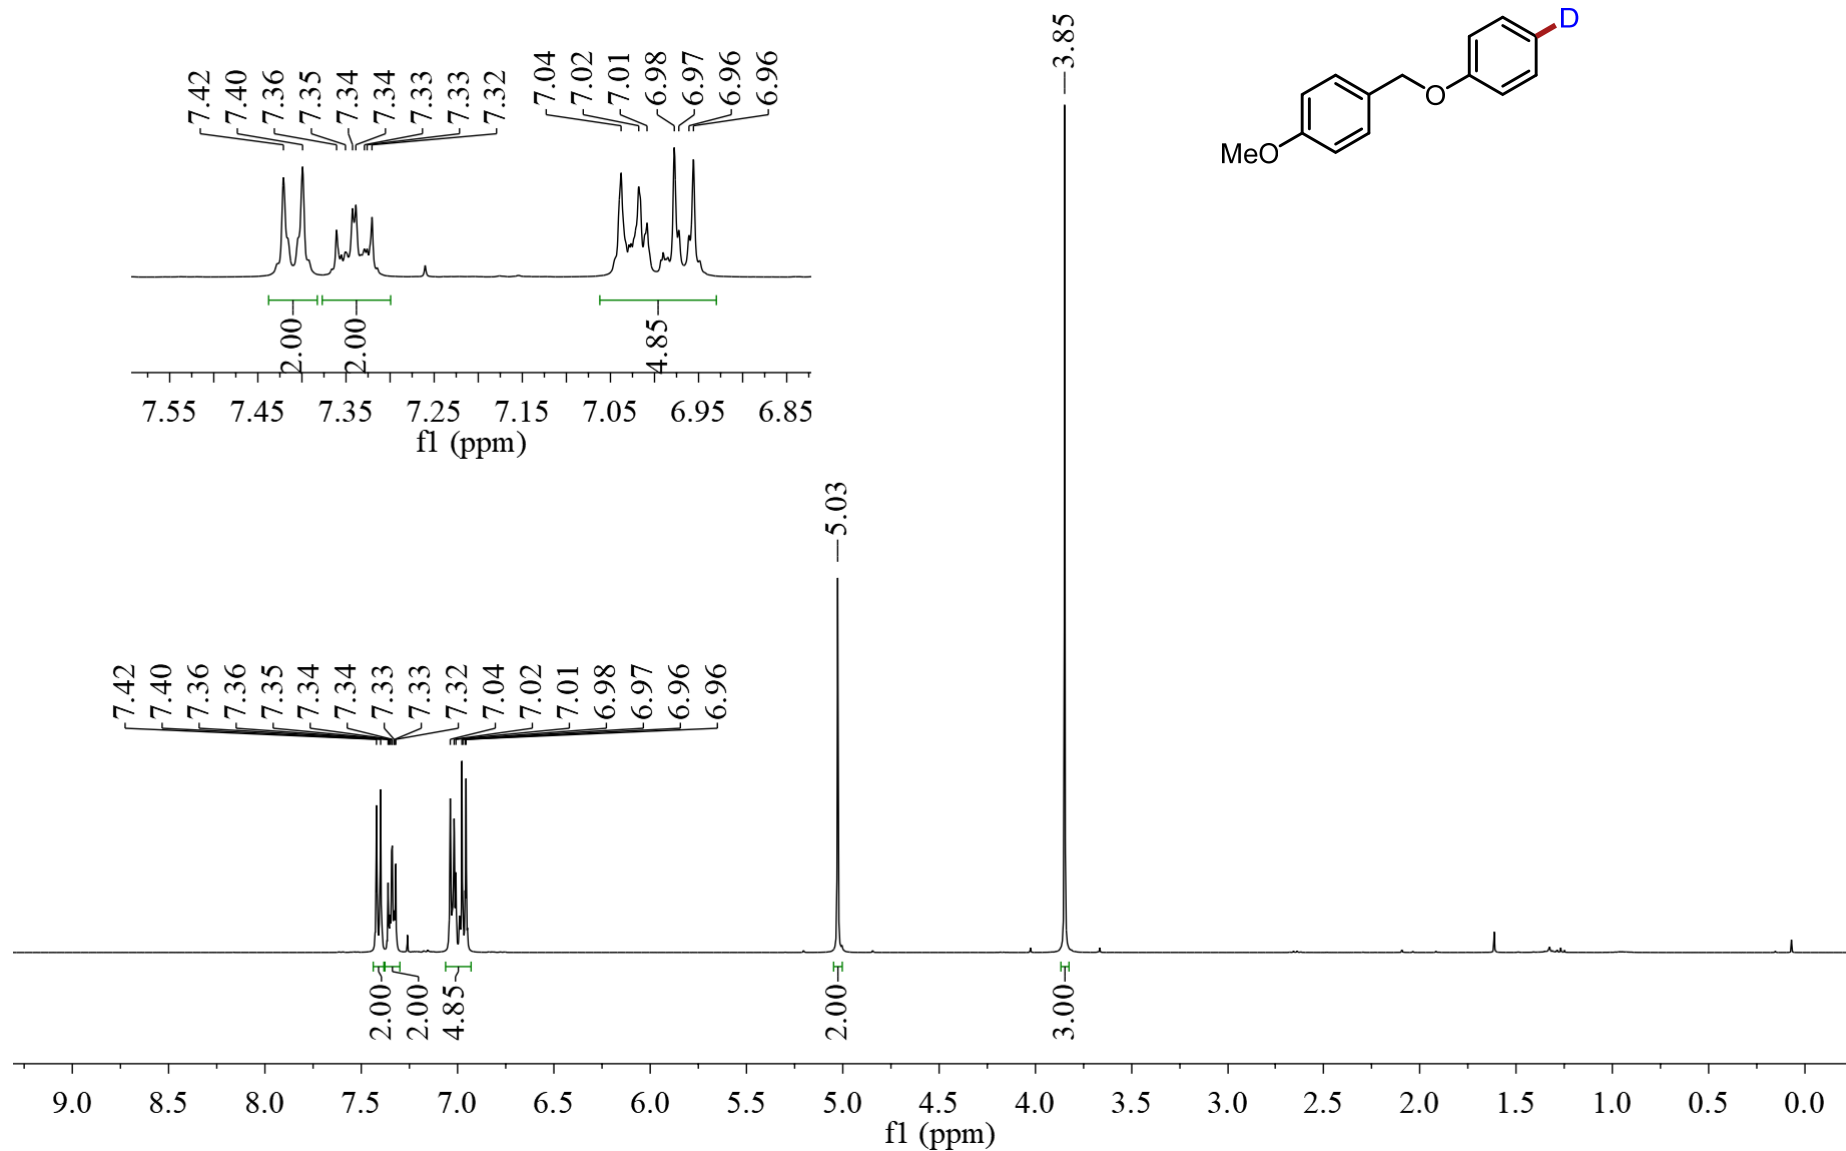

$^{13}\text{C}$  NMR (101 MHz,  $\text{CDCl}_3$ ) spectrum of **5**

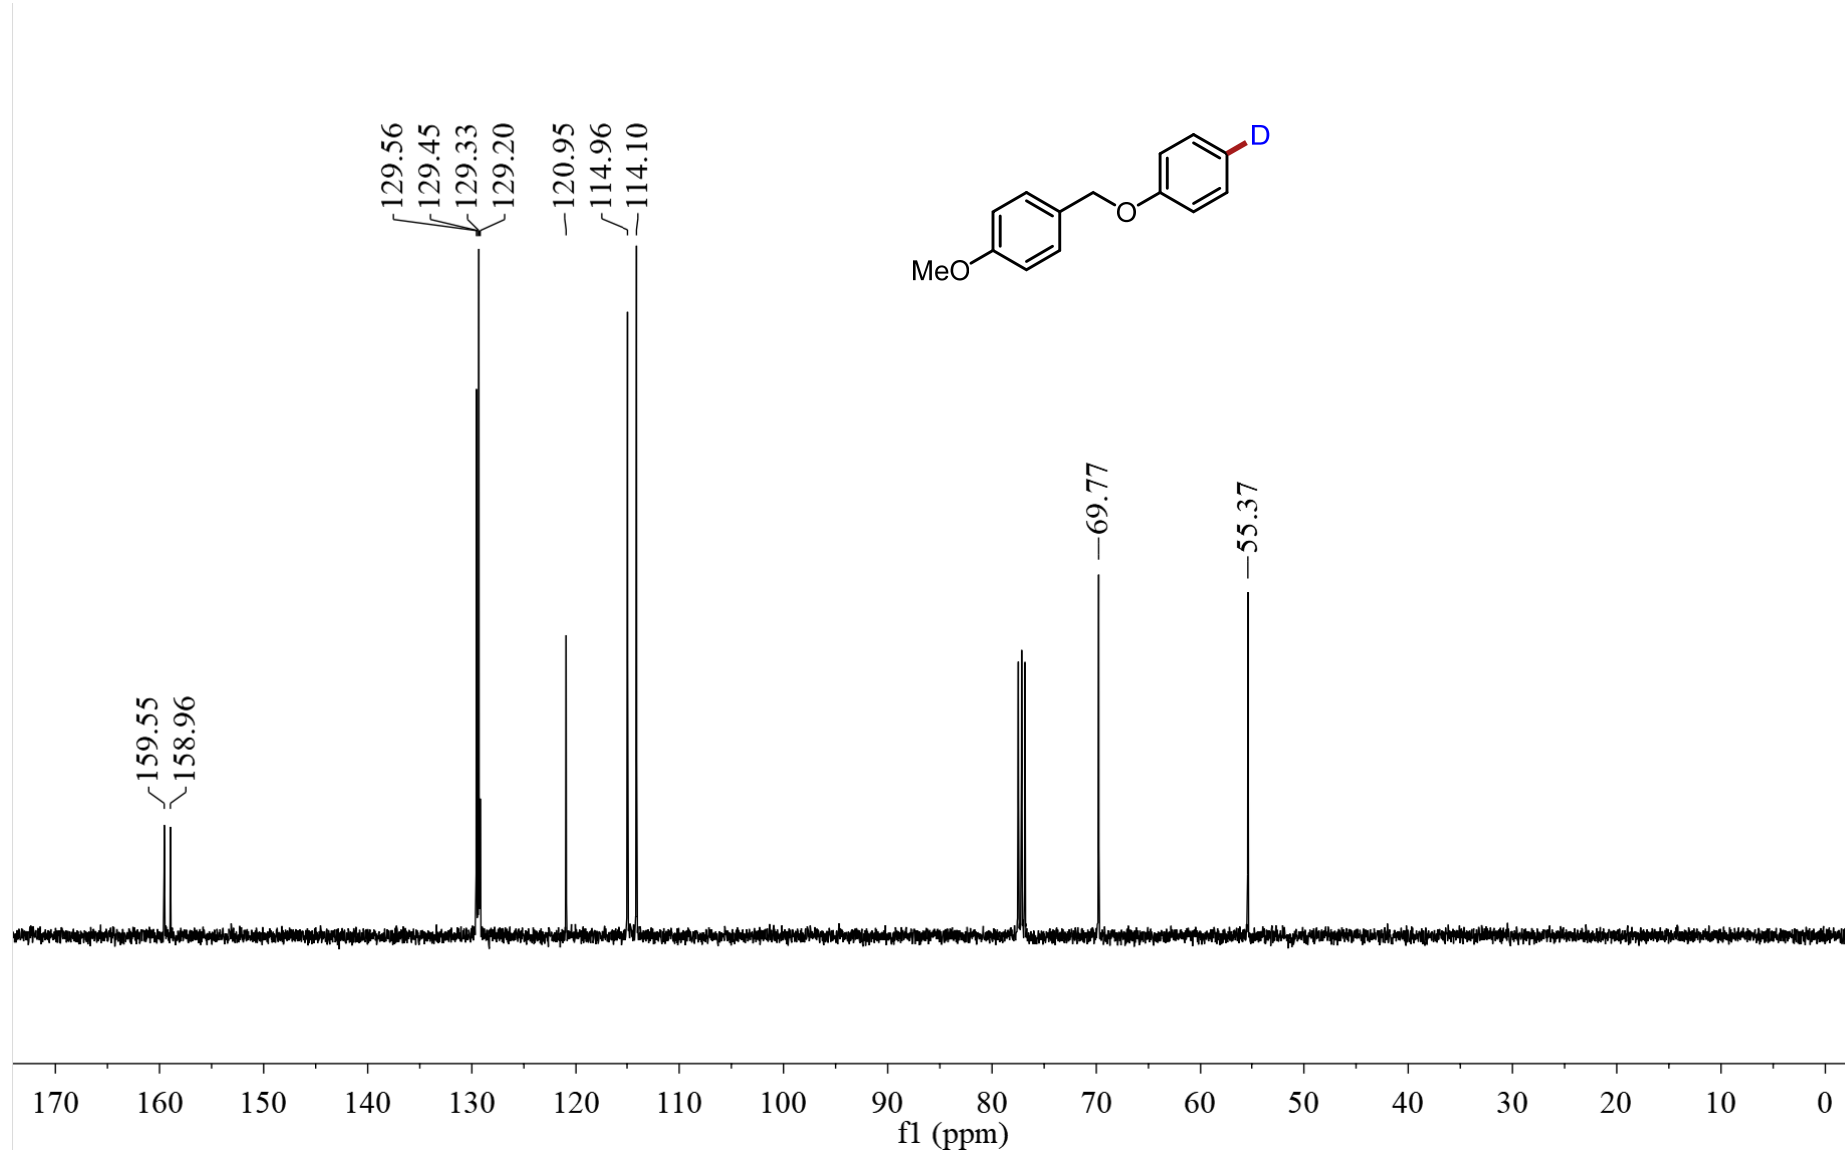

Supplement: d3ob01552a1.pdf [file d3ob01552a1.pdf]
